# Supplementary material for: Catalytic bio–chemo and bio–bio tandem oxidation reactions for amide and carboxylic acid synthesis
Source: Royal Society of Chemistry journal article supplement (doi:10.1039/c4gc01321b), 2014-01-01
Supplement: c4gc01321b1.pdf [file c4gc01321b1.pdf]

## Catalytic Bio-Chemo and Bio-Bio Tandem oxidation reactions for amide and carboxylic acid synthesis

Beatrice Bechi<sup>\*a</sup>, Susanne Herter<sup>\*a</sup>, Shane McKenna<sup>b</sup>, Christopher Riley<sup>b</sup>, Silke Leimkühler<sup>c</sup>,  
Nicholas J. Turner<sup>a</sup> and Andrew J. Carnell<sup>#b</sup>

<sup>\*</sup>The authors equally contributed to this work

<sup>[a]</sup> Prof. N. J. Turner, Dr. B. Bechi, Dr. S. Herter  
Manchester Institute of Biotechnology,  
University of Manchester,  
131 Princess Street,  
Manchester, M1 7DN, United Kingdom

<sup>[b]</sup> Dr. A. J. Carnell<sup>#</sup>, S. McKenna, C. Riley  
Department of Chemistry,  
University of Liverpool,  
Crown Street,  
Liverpool, L69 7ZD, United Kingdom  
<sup>#</sup> E-mail: acarnell@liv.ac.uk

<sup>[c]</sup> Prof. S. Leimkühler  
Institute of Biochemistry and Biology,  
University of Potsdam,  
Maulbeerallee 2,  
D-14476 Potsdam, Germany

### Electronic Supporting Information

---

---

## Table of Contents

---

|                                                                                                                                      |     |
|--------------------------------------------------------------------------------------------------------------------------------------|-----|
| 1. General experimental information and materials                                                                                    | S3  |
| 2. Preparation of biocatalysts                                                                                                       | S3  |
| 3. Cascade 1: Bio-chemo and bio-biocatalytic oxidative conversion of benzyl alcohols <b>1</b> to amides <b>3</b> and <b>4</b>        | S5  |
| 3.1. General procedure A                                                                                                             | S5  |
| 3.2. General procedure B                                                                                                             | S5  |
| 3.3. Synthesis of amide standards                                                                                                    | S6  |
| 3.4. Analytical scale reactions according to general procedures A and B                                                              | S6  |
| 3.5. Preparative scale reactions according to general procedure B                                                                    | S19 |
| 4. Cascade 2: GOase M <sub>3-5</sub> - <i>E. coli</i> XDH-catalysed oxidation of benzyl alcohols <b>1</b> to acids <b>5</b>          | S28 |
| 4.1 Screening of <i>E. coli</i> XDH towards a diverse set of selected aldehyde substrates using NBT                                  | S28 |
| 4.2. General method for bio-biocatalytic cascade reactions for synthesis of acids <b>5</b>                                           | S35 |
| 4.3. Optimisation, scale up and time course for synthesis of 3-methoxybenzoic acid <b>5s</b> from 3-methoxybenzyl alcohol <b>1s</b>  | S37 |
| 5. Cascade 3: Bio-chemo and bio-biocatalytic cascade reactions for synthesis of lactams <b>8</b> from cyclic amines <b>6</b>         | S41 |
| 5.1. Synthesis of tetrahydroisoquinolines                                                                                            | S41 |
| 5.2. Liquid phase screening of MAO-N D9 for oxidation of tetrahydroisoquinolines                                                     | S43 |
| 5.3. Optimisation of Cu(I)-catalysed imine oxidation: screening of H <sub>2</sub> O <sub>2</sub> amount                              | S43 |
| 5.4. One-pot two-step cascade reactions for synthesis of lactams <b>8</b> - General procedure C                                      | S44 |
| 5.4.1. Analytical scale method - Bio-chemo catalytic cascade reactions for synthesis of lactams <b>8</b> from cyclic amines <b>6</b> | S44 |
| 5.4.2. Preparative method - Bio-chemo catalytic cascade reactions for synthesis of lactams <b>8</b> from cyclic amines <b>6</b>      | S48 |
| 5.4.3. Analytical scale method - Bio-biocatalytic cascade reactions for synthesis of lactams <b>8</b> from cyclic amines <b>6</b>    | S51 |
| 5.5. Synthesis of 2-methyl-3,4-dihydroisoquinolin-1(2 <i>H</i> )-one <b>8c</b>                                                       | S54 |
| 5.6. Screening of electron acceptors for xanthine dehydrogenases for conversion of <b>7a</b> to <b>8a</b>                            | S57 |
| 6. References                                                                                                                        | S58 |

### List of Tables

|          |     |
|----------|-----|
| Table S1 | S17 |
| Table S2 | S18 |
| Table S3 | S28 |
| Table S4 | S35 |
| Table S5 | S37 |
| Table S6 | S43 |
| Table S7 | S43 |
| Table S8 | S57 |

---

## 1. General experimental information and materials

Competent *E. coli* BL21 (DE3) and BL21 Star<sup>TM</sup> (DE3) cells for expression of MAO-N variant D9 and GOase variant M<sub>3.5</sub>, respectively, were purchased from Invitrogen and transformed according to the manufacturer's protocol. The empty vectors pET-16b and pET-30a used for cloning of MAO-N D9 and GOase M<sub>3.5</sub> originate from Novagen. The *E. coli* TP1000 mutant strain used for XDH E232V expression is a derivative of MC4100 with a kanamycin cassette inserted in the mobAB gene region.<sup>1</sup> Cell lysis was performed by sonication using a Soniprep 150 (MSE UK Ltd.) and lysozyme from chicken egg white from Sigma. *Trametes versicolor* laccase, *E. coli* xanthine dehydrogenase,<sup>2</sup> horseradish peroxidase (HRP) and catalase were sourced from Sigma-Aldrich. Starting materials were purchased from Alfa Aesar and Sigma-Aldrich and used as received. Solvents were analytical or HPLC grade or were purchased dried over molecular sieves where necessary. Column chromatography was performed on silica gel (Sigma-Aldrich, 220-440 mesh). <sup>1</sup>H and <sup>13</sup>C NMR spectra were recorded on a Bruker Avance 400,500 or 800 without additional internal standard. Chemical shifts are reported in  $\delta$  values (ppm) and are calibrated against residual solvent signal. The following abbreviations were used to define the multiplicities: s, singlet; d, doublet; t, triplet; q, quartet; m, multiplet; b, broad. HPLC analysis was performed on an Agilent system equipped with a G1379A degasser, G1312A binary pump, a G1329 autosampler unit, a G1315B diode array detector and a G1316A temperature controlled column compartment. The columns used were CHIRALPAK<sup>®</sup> IC (5  $\mu$ m particle size, 4.6 mm diameter x 250 mm), CHIRALPAK<sup>®</sup> IA (5  $\mu$ m particle size, 4.6 mm diameter x 250 mm) and CHIRALPAK<sup>®</sup> OJH (5  $\mu$ m particle size, 4.6 mm diameter x 250 mm). Conditions are indicated separately for each compound.

## 2. Preparation of biocatalysts

### Monoamine oxidase variant D9 (MAO-N D9)

MAO-N D9 mutant<sup>3</sup> was transformed into *E. coli* BL21 (DE3) cells (Invitrogen) according to the manufacturer's instructions. A single colony was used to inoculate a pre-culture (5 mL) which was grown in LB with ampicillin (100 mg/L) at 37 °C and 250 rpm until an OD<sub>600nm</sub> between 0.6-1.0 was reached. 2-L-Erlenmeyer flasks containing 600 mL LB with ampicillin (100 mg/L) were inoculated with 5 mL of pre-culture and incubated at 37 °C and 250 rpm for 24 h. The cells were harvested by centrifugation at 8000 rpm and 4 °C for 20 min. The cell pellet was stored at -20°C until needed. Typically, 4 g of cells were obtained from a 600-mL culture.

### Galactose oxidase variant M<sub>3.5</sub> (GOaseM<sub>3.5</sub>)

GOase mutant M<sub>3.5</sub><sup>4</sup> was transformed into *E. coli* BL21 Star<sup>TM</sup> (DE3) cells (Invitrogen) according to manufacturer's specifications. A single colony was picked from an overnight LB plate containing 1  $\mu$ L of kanamycin of a 30 mg/mL stock solution per mL of agar and used to inoculate 5 mL LB medium supplemented with 5  $\mu$ L kanamycin and grown overnight at 37 °C and 250 rpm. 500  $\mu$ L of the overnight culture was used to inoculate 250 mL of an autoinduction medium (8ZY-4LAC) as described by Deacon and McPherson<sup>5</sup> and supplemented with 250  $\mu$ L of kanamycin in a 2-L-baffled Erlenmeyer flask. The cells were grown at 26 °C and 250 rpm for 60 h. Cells were harvested by centrifugation at 6000 rpm and 4 °C for 20 min and subsequently prepared for protein purification.

---

### **Xanthine dehydrogenase variant E232V (XDH E232V)**

For XDH mutant E232V expression,<sup>6,7</sup> the plasmid pSL207 derived from pTrcHisA (Invitrogen), containing the *xdh* E232V genes with a His6 tag fused to the N terminus of XDHA, was used. For heterologous expression in *E. coli*, pSL207 was transformed into *E. coli* TP1000 cells, containing a deletion in the *mobAB* genes responsible for Moco dinucleotide formation. The enzyme was expressed in 500-mL-cultures of TP1000 cells carrying plasmid pSL207 grown at 30 °C in LB medium supplemented with 150 µg/mL ampicillin, 1 mM molybdate, and 0.02 mM isopropyl-D-thiogalactopyranoside until the OD<sub>600nm</sub> = 1. This culture was then transferred to a bottle containing 8 liters of supplemented LB medium and subsequently grown at 30 °C for 18 - 20 h. Cells were harvested by centrifugation at 5000 x *g* at 4 °C and subsequently prepared for protein purification.

### **Purification of MAO-N D9**

5 g of frozen cell paste were thawed on ice and resuspended in 25 mL of phosphate buffer (100 mM KPi, pH 7.7; containing 1 mg/mL of lysozyme from chicken egg white) and incubated at 30 °C for 30 min. The suspension was cooled to 4 °C and cells were lysed by ultrasonication (30 s on, 30 s off; 20 cycles). Cell debris was removed by centrifugation (15000 x *g*, 40 min, 4 °C). Subsequently, the cell-free extracts were filtered through a syringe filter with a 0.22 µm pore size. The cell-free extracts, after filtration, were loaded onto a HisTrap Ni-sepharose column (1 mL, GEHealthcare) pre-equilibrated with buffer A (100 mM KPi, pH 7.7, 300 mM NaCl). The protein was eluted with a stepped gradient using an Äkta explorer system from GE Healthcare with the following profile collecting 1 mL fractions. Step 1, 10 mL buffer A; Step 2, 10 mL 80:20 buffer A : buffer B; Step 3, 30 mL 65:35 buffer A : buffer B. Buffer B contained 100 mM KPi, pH 7.7, 300 mM NaCl, 1 M imidazole. The MAO-N containing fractions (from step 3) were pooled and concentrated using a Sartorius Vivaspin 6 spin column (30 kDa mass cut-off), and the volume adjusted to 2.5 mL. The concentrated fractions were desalted using a PD-10 Sephadex column and buffer A.

### **Purification of GOase M<sub>3,5</sub>**

The cell pellet from a 250-mL-culture was resuspended in 30 mL lysis buffer containing 50 mM piperazine-*N,N'*-bis(2-ethanesulfonic acid) (PIPES), 25 % sucrose (w/v), 1 mg/mL lysozyme, 5 mM MnCl<sub>2</sub> and 1 % Triton X-100 (v/v). The suspension was gently shaken at 4 °C for 20 min. Afterwards, cells were mechanically disrupted *via* ultrasonication (30 s on, 30 s off; 20 cycles) followed by ultracentrifugation (20000 x *g*, 30 min, 4 °C). The cleared crude extract was transferred into a flexible tubing (30 kDa cut-off), dialysed into buffer C (50 mM NaPi buffer, 300 mM NaCl, pH 8.0) for 12 h at 4 °C and subsequently passed through a syringe filter with a 0.22 µm pore size. Protein purification was accomplished with a peristaltic tubing pump (Thermo Scientific) equipped with a 5-mL-Strep-Tag®-II column (GE Healthcare) pre-equilibrated with buffer C. After loading with crude extract, the column was washed with 5 column volumes of buffer C followed by protein elution with 70 mL of buffer D (50 mM NaPi buffer, 300 mM NaCl, 5 mM desthiobiotin, pH 8.0).

For copper-loading, GOase M<sub>3,5</sub>-containing fractions were pooled and subsequently transferred into flexible dialysis tubing (30 kDa cut-off) and dialysed for 12 h into buffer E (50 mM NaPi buffer saturated with CuSO<sub>4</sub>, pH 7.4) at 4 °C. Removal of excess CuSO<sub>4</sub> was attained by two cycles of dialysis into buffer E (without CuSO<sub>4</sub>) for 12 h at 4 °C and protein samples concentrated to approximately 3 mg/mL using a Sartorius Vivaspin 6 spin column (30 kDa mass cut-off). The protein samples were aliquoted and aliquots were frozen in liquid nitrogen prior to storage at -80 °C.

---

### Purification of XDH E232V

The cell pellet was resuspended in 8 volumes of 50 mM sodium phosphate, 300 mM NaCl, pH 8.0, and cell lysis was achieved by several passages through a French press. After addition of DNase I, the lysate was incubated for 30 min. After centrifugation at 17000 x g for 25 min, imidazole was added to the supernatant to a final concentration of 10 mM. The supernatant was mixed with 2 mL of Ni<sub>2</sub>-nitrilotriacetic agarose (Qiagen) per liter of cell growth, and the slurry was equilibrated with gentle stirring at 4 °C for 30 min. The slurry was poured into a column, and the resin was washed with 2 column volumes of 10 mM imidazole, 50 mM sodium phosphate, 300 mM NaCl, pH 8.0, followed by a wash with 10 column volumes of the same buffer with 20 mM imidazole. His-tagged XDH E232V was eluted with 100 mM imidazole in 50 mM sodium phosphate, 300 mM NaCl, pH 8.0. Fractions containing XDH were combined and dialyzed against 50 mM Tris, 1 mM EDTA, 2.5 mM dithiothreitol, pH 7.5. The dialyzed sample was applied to a Q-Sepharose fast protein liquid chromatography column and eluted with a linear gradient of 0-250 mM NaCl. To the pool of fractions containing XDH, 15 % ammonium sulfate was added, and the protein was then applied to a phenyl-Sepharose column equilibrated with 50 mM Tris, 1 mM EDTA, 2.5 mM dithiothreitol, 15 % ammonium sulfate, pH 7.5. XDH E232V was eluted from the column with a linear gradient of 15 to 0 % ammonium sulfate. During purification, fractions were monitored using SDS-PAGE, whereas enzyme activity was measured spectrophotometrically as described earlier. The yield of protein was about 12.5 mg/L of *E. coli* culture.

### 3. Cascade 1

#### 3.1 GOase M<sub>3.5</sub>-catalysed oxidation of benzyl alcohols and amide formation reactions - General procedure A

For analytical scale reactions, the primary alcohol dissolved in MeCN (500 mM stock solution) and applied in 5, 7 and 10 mM final concentrations with pure GOase M<sub>3.5</sub> (7.25 µM final concentration) were transferred to a solution of NaPi buffer (50 mM, pH 7.4) supplemented with HRP (75 U/mL) reaching a final volume of 500 µL in a 2-mL-Eppendorf tube. The tube was placed in a shaking incubator and incubated at 25 °C and 250 rpm. After 24 h of reaction (1<sup>st</sup> step for aldehyde formation), 5 eq. of amine with respect to the concentration of alcohol and TBHP (6 %, v/v) were directly applied to the reaction mixture followed by incubation at 37 °C and 250 rpm for 24 h (2<sup>nd</sup> step for amide formation). The reaction was monitored by HPLC and samples were prepared as follows: 500 µL DCM was added to 100 µL of sample of the reaction mixture in a 1.5-mL-Eppendorf tube. After vigorous mixing by means of a vortex mixer, the sample was centrifuged at 13200 rpm for 5 min. The organic phase was collected, dried with MgSO<sub>4</sub> and analysed by normal phase HPLC.

For preparative scale reactions, primary alcohol dissolved in MeCN (500 mM stock solution) at a 10 mM final concentration and pure GOase M<sub>3.5</sub> (7.25 µM final concentration) were transferred to a solution of NaPi buffer (50 mM, pH 7.4) supplemented with HRP (75 U/mL) reaching a final volume of 3 mL in a 15-mL-Falcon tube. Subsequent steps were identical to analytical scale experiments.

#### 3.2 Laccase/TEMPO-mediated oxidation of benzyl alcohols and amide formation reactions - General procedure B

For analytical and preparative scale reactions, primary alcohol dissolved in MeCN (1 M stock solution) and used at 20, 50 and 80 mM final concentrations and a solution of *Trametes versicolor* laccase (TvL; 3.0, 7.5 and 12.0 U/mL final concentration) were transferred to a solution of sodium citrate buffer (100 mM, pH 5.0) supplemented with 6, 15 or 24 mM TEMPO reaching a final volume

of 3 mL in a 15-mL-Falcon tube. The tube was placed in a shaking incubator and incubated at 20 °C and 250 rpm for 24 h (1<sup>st</sup> step for aldehyde formation). Afterwards, 5 eq. of amine with respect to the concentration of the primary alcohol and 1.2 eq of TBHP were directly applied to the reaction mixture followed by incubation at 37 °C and 250 rpm for 24 h (2<sup>nd</sup> step for amide formation). The reaction was monitored by HPLC and samples were prepared as described in general procedure A.

### 3.3 Synthesis of amide standards

The standards for the amides **3a-d**, **3f** and **3h-k**, were synthesised using general procedure B, while **3e** was purchased from Sigma Aldrich. Conversions for reactions yielding **3g** were determined by comparison of the new formed peak and the similar halogenated amides.

### 3.4 Analytical scale reactions according to general procedures A and B

#### (4-Nitrophenyl)(piperidin-1-yl)methanone

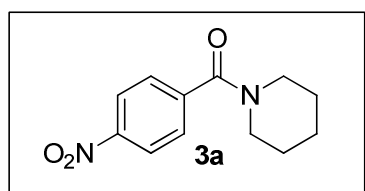

The reaction was performed following general procedures A and B, respectively. Procedure A: 7.25  $\mu$ M GOase M<sub>3-5</sub>, 10 mM *para*-nitrobenzyl alcohol (**1a**), 24 h of reaction (aldehyde formation) followed by addition of 5 eq. piperidine and 6 % TBHP (v/v) and reaction for further 24 h. Procedure B: 12 U mL<sup>-1</sup> TvL/24 mM TEMPO, 80 mM *para*-nitrobenzyl alcohol (**1a**), 24 h of reaction (aldehyde formation) followed by addition of 5 eq. piperidine and 1.2 eq TBHP and reaction for further 24 h.

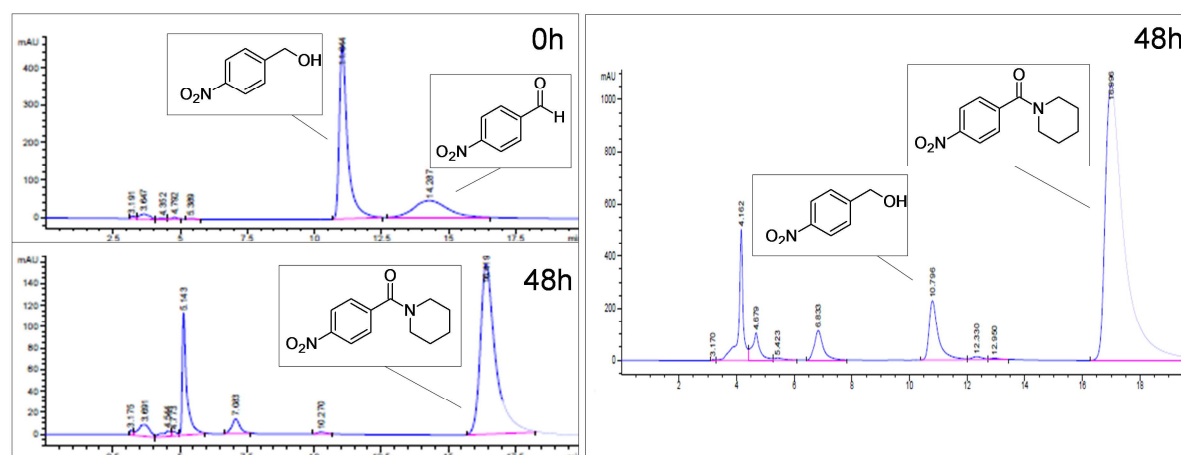

**Figure S1.** HPLC traces of *para*-nitrobenzyl alcohol (**1a**) oxidation using GOase M<sub>3-5</sub> (left images) and TvL/TEMPO (right images) and subsequent amide formation reaction yielding (4-nitrophenyl)(piperidin-1-yl)methanone **3a** (respective 48-h-images at the bottom). HPLC conditions: CHIRALPAK<sup>®</sup> IA column; flow rate 1.0 mL/min; UV 254 nm; eluent= hexane/iPrOH 90:10. Peak at 5.143 (48-h-image, left) is an unknown UV-active substance derived from TBHP, whereas peak at 4.162 min (48-h-image, right) is an unknown UV-active substance derived from TEMPO.

## Piperidin-1-yl[4-(trifluoromethyl)phenyl]methanone

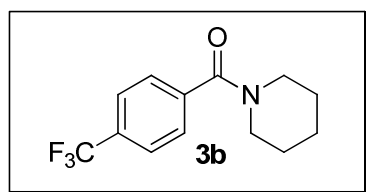

The reaction was performed following general procedures A and B, respectively. Procedure A: 7.25  $\mu\text{M}$  GOase M<sub>3-5</sub>, 10 mM *para*-trifluorobenzyl alcohol (**1b**), 24 h of reaction (aldehyde formation) followed by addition of 5 eq. piperidine and 6 % TBHP (v/v) and reaction for further 24 h. Procedure B: 12 U mL<sup>-1</sup> TvL/24 mM TEMPO, 80 mM *para*-trifluorobenzyl alcohol (**1b**), 24 h of reaction (aldehyde formation) followed by addition of 5 eq. piperidine and 1.2 eq TBHP and reaction for further 24 h.

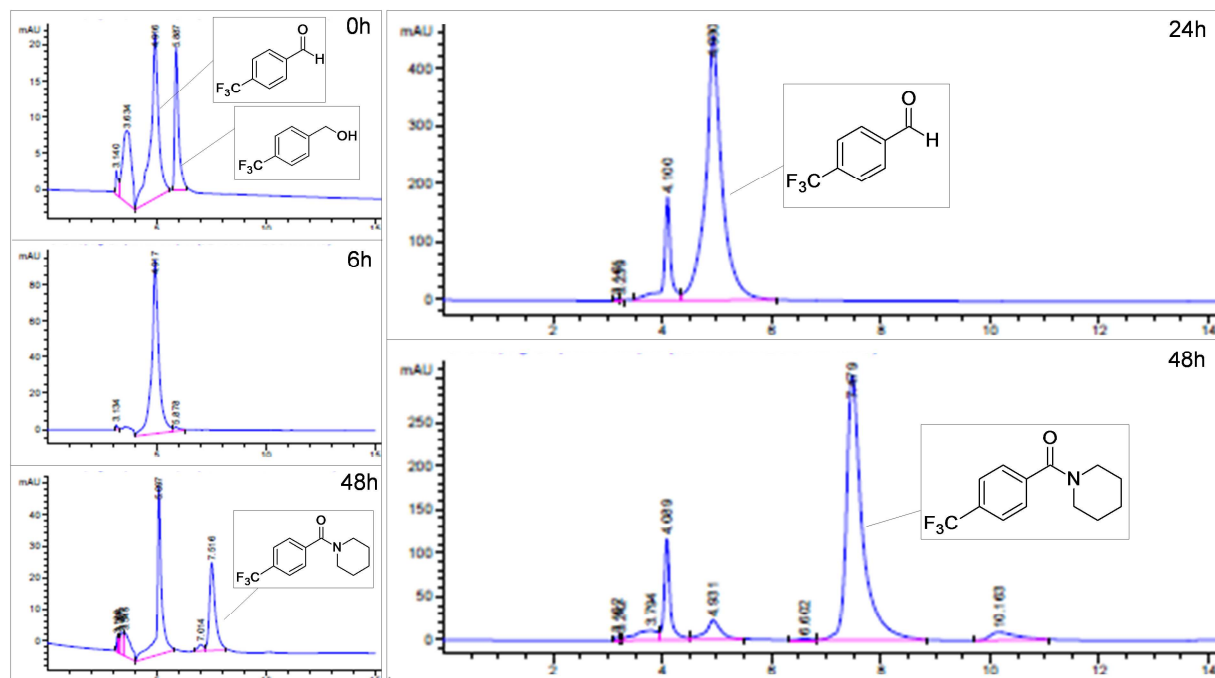

**Figure S2.** HPLC traces of *para*-trifluorobenzyl alcohol (**1b**) oxidation using GOase M<sub>3-5</sub> (left images) and TvL/TEMPO (right images) and subsequent amide formation reaction yielding piperidin-1-yl[4-(trifluoromethyl)phenyl]methanone **3b** (respective 48-h-images at the bottom). HPLC conditions: CHIRALPAK<sup>®</sup> IA column; flow rate 1.0 mL/min; UV 254 nm; eluent= hexane/iPrOH 90:10. Peak at 5.097 (48-h-image, left) is an unknown UV-active substance derived from TBHP, whereas peak at 4.100/4.089 min (24- and 48-h-image, right) is an unknown UV-active substance derived from TEMPO.

### (4-Iodophenyl)(piperidin-1-yl)methanone

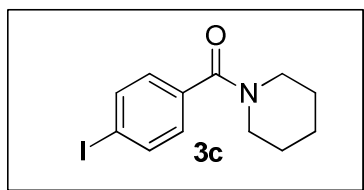

The reaction was performed following general procedures A and B, respectively. Procedure A: 7.25  $\mu\text{M}$  GOase M<sub>3-5</sub>, 10 mM *para*-iodobenzyl alcohol (**1c**), 24 h of reaction (aldehyde formation) followed by addition of 5 eq. piperidine and 6 % TBHP (v/v) and reaction for further 24 h. Procedure B: 12 U mL<sup>-1</sup> TvL/24 mM TEMPO, 80 mM *para*-iodobenzyl alcohol (**1c**), 24 h of reaction (aldehyde formation) followed by addition of 5 eq. piperidine and 1.2 eq TBHP and reaction for further 24 h.

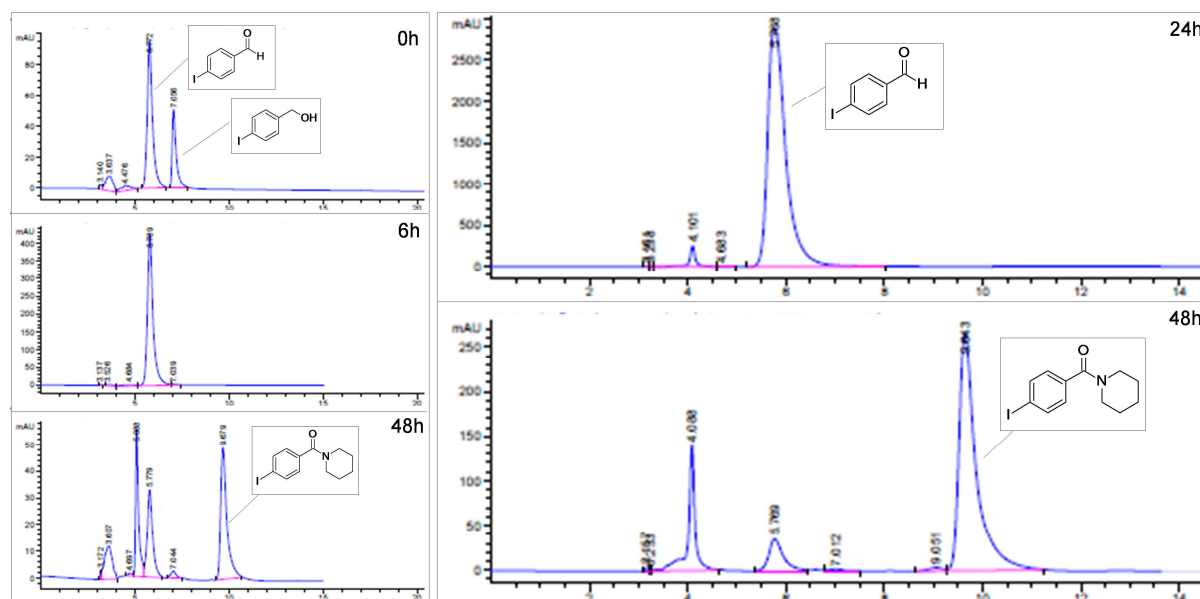

**Figure S3.** HPLC traces of *para*-iodobenzyl alcohol (**1c**) oxidation using GOase M<sub>3-5</sub> (left images) and TvL/TEMPO (right images) and subsequent amide formation reaction yielding (4-iodophenyl)(piperidin-1-yl)methanone **3c** (respective 48-h-images at the bottom). HPLC conditions: CHIRALPAK<sup>®</sup> IA column; flow rate 1.0 mL/min; UV 254 nm; eluent= hexane/iPrOH 90:10. Peak at 5.008 (48-h-image, left) is an unknown UV-active substance derived from TBHP, whereas peak at 4.101/4.088 min (24- and 48-h-image, right) is an unknown UV-active substance derived from TEMPO.



### (4-Bromophenyl)(piperidin-1-yl)methanone

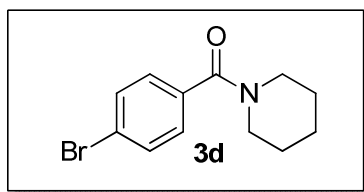

The reaction was performed following general procedures A and B, respectively. Procedure A: 7.25  $\mu$ M GOase M<sub>3-5</sub>, 10 mM *para*-bromobenzyl alcohol (**1d**), 24 h of reaction (aldehyde formation) followed by addition of 5 eq. piperidine and 6 % TBHP (v/v) and reaction for further 24 h. Procedure B: 12 U mL<sup>-1</sup> TvL/24 mM TEMPO, 80 mM *para*-bromobenzyl alcohol (**1d**), 24 h of reaction (aldehyde formation) followed by addition of 5 eq. piperidine and 1.2 eq TBHP and reaction for further 24 h.

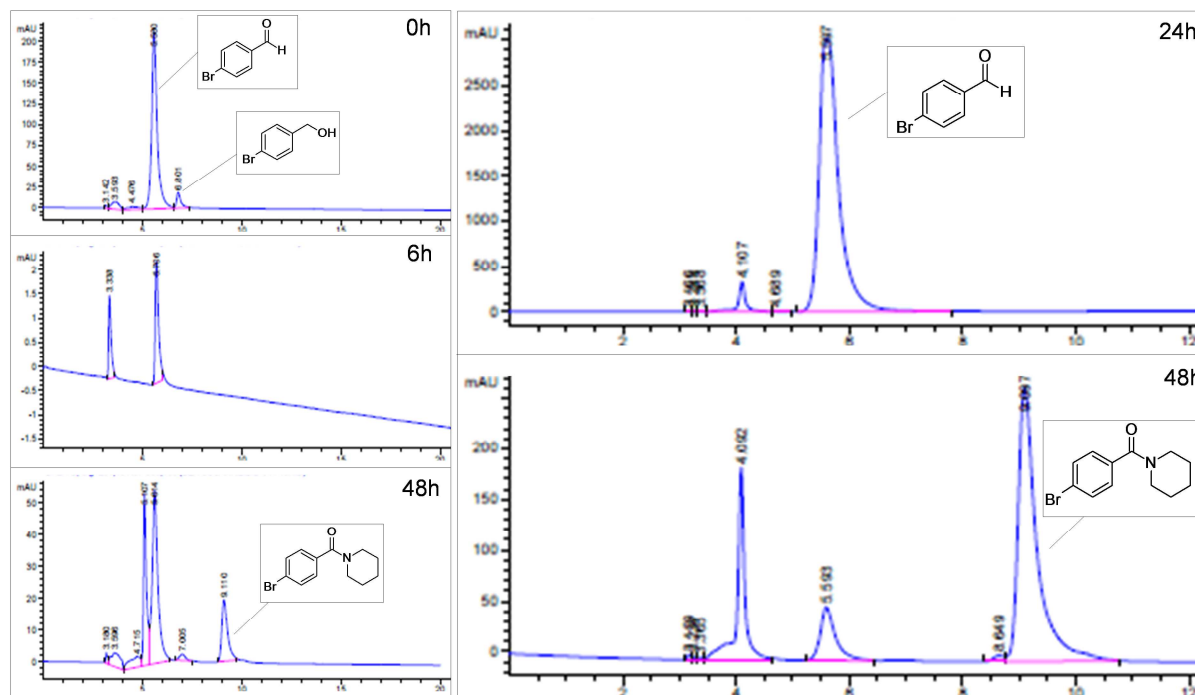

**Figure S4.** HPLC traces of *para*-bromobenzyl alcohol (**1d**) oxidation using GOase M<sub>3-5</sub> (left images) and TvL/TEMPO (right images) and subsequent amide formation reaction yielding (4-bromophenyl)(piperidin-1-yl)methanone **3d** (respective 48-h-images at the bottom). HPLC conditions: CHIRALPAK<sup>®</sup> IA column; flow rate 1.0 mL/min; UV 254 nm; eluent= hexane/iPrOH 90:10. Peak at 5.107 (48-h-image, left) is an unknown UV-active substance derived from TBHP, whereas peak at 4.092 min (24- and 48-h-image, right) is an unknown UV-active substance derived from TEMPO.

## Phenyl(piperidin-1-yl)methanone

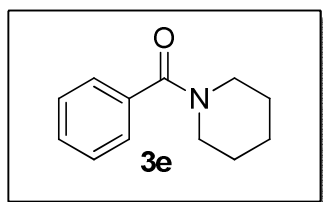

The reaction was performed following general procedures A and B, respectively. Procedure A: 7.25  $\mu\text{M}$  GOase M<sub>3-5</sub>, 7 mM benzyl alcohol (**1e**), 24 h of reaction (aldehyde formation) followed by addition of 5 eq. piperidine and 6 % TBHP (v/v) and reaction for further 24 h. Procedure B: 7.5 U mL<sup>-1</sup> TvL/15 mM TEMPO, 50 mM benzyl alcohol (**1e**), 24 h of reaction (aldehyde formation) followed by addition of 5 eq. piperidine and 1.2 eq TBHP and reaction for further 24 h.

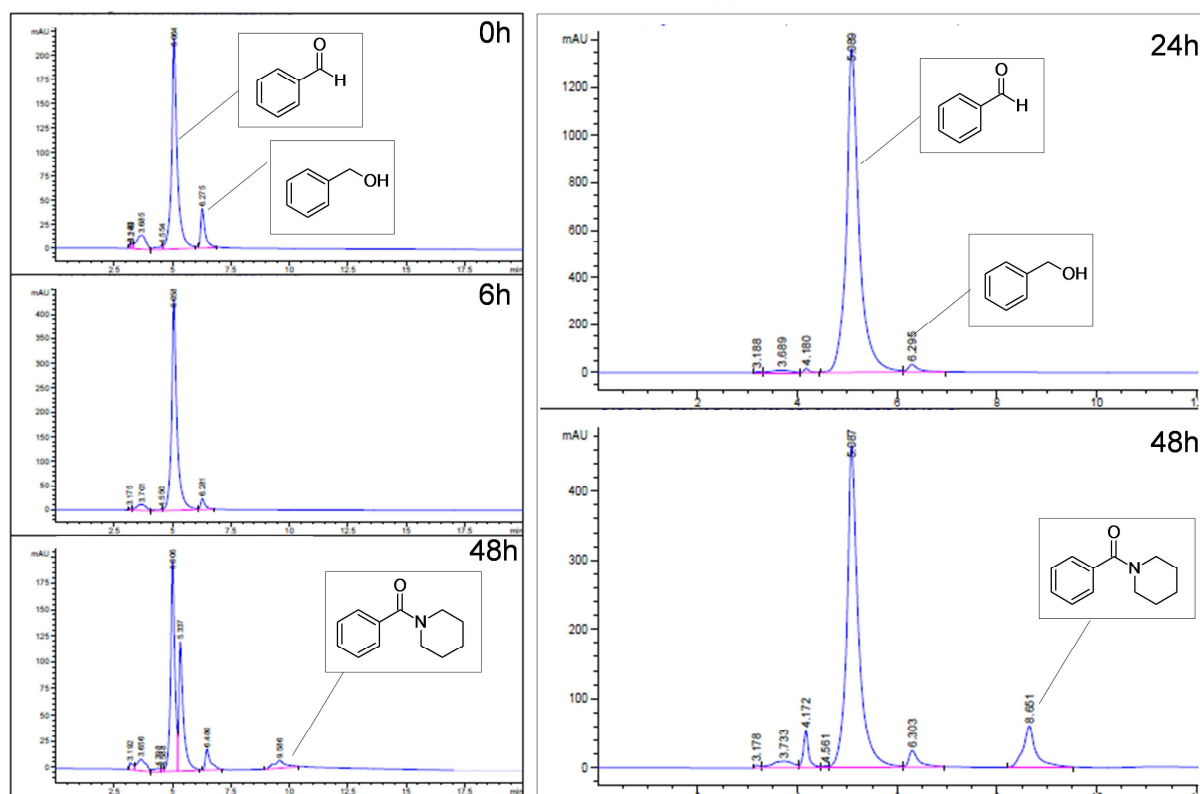

**Figure S5.** HPLC traces of benzyl alcohol (**1e**) oxidation using GOase M<sub>3-5</sub> (left images) and TvL/TEMPO (right images) and subsequent amide formation reaction yielding phenyl(piperidin-1-yl)methanone **3a** (respective 48-h-images at the bottom). HPLC conditions: CHIRALPAK<sup>®</sup> IA column; flow rate 1.0 mL/min; UV 254 nm; eluent= hexane/iPrOH 90:10. Peak at 5.008 (48-h-image, left) is an unknown UV-active substance derived from TBHP, whereas peak at 4.172 min (24- and 48-h-image, right) is an unknown UV-active substance derived from TEMPO.

### (4-Chlorophenyl)(piperidin-1-yl)methanone

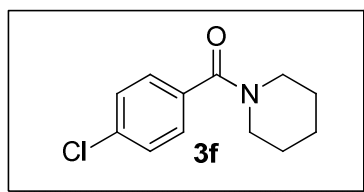

The reaction was performed following general procedures A and B, respectively. Procedure A: 7.25  $\mu\text{M}$  GOase  $\text{M}_{3-5}$ , 10 mM *para*-chlorobenzyl alcohol (**1f**), 24 h of reaction (aldehyde formation) followed by addition of 5 eq. piperidine and 6 % TBHP (v/v) and reaction for further 24 h. Procedure B: 12 U  $\text{mL}^{-1}$  TvL/24 mM TEMPO, 80 mM *para*-chlorobenzyl alcohol (**1f**), 24 h of reaction (aldehyde formation) followed by addition of 5 eq. piperidine and 1.2 eq TBHP and reaction for further 24 h.

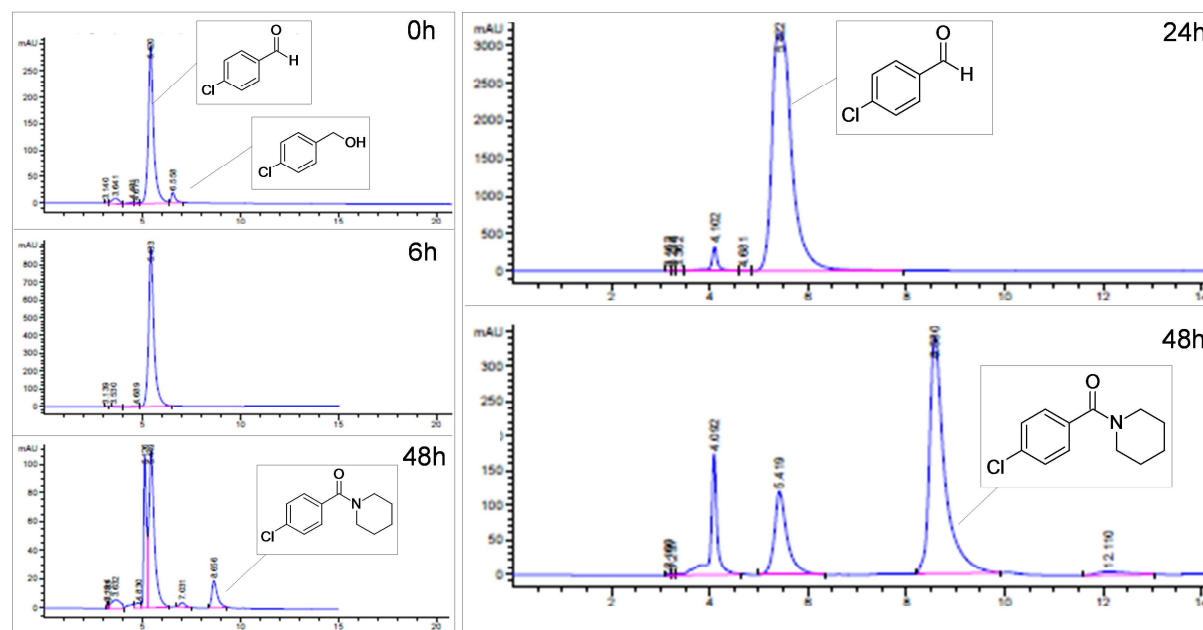

**Figure S6.** HPLC traces of *para*-chlorobenzyl alcohol (**1f**) oxidation using GOase  $\text{M}_{3-5}$  (left images) and TvL/TEMPO (right images) and subsequent amide formation reaction yielding (4-chlorophenyl)(piperidin-1-yl)methanone **3f** (respective 48-h-images at the bottom). HPLC conditions: CHIRALPAK<sup>®</sup> IA column; flow rate 1.0 mL/min; UV 254 nm; eluent= hexane/iPrOH 90:10. Peak at 5.126 (48-h-image, left) is an unknown UV-active substance derived from TBHP, whereas peak at 4.092 min (24- and 48-h-image, right) is an unknown UV-active substance derived from TEMPO.

### (4-Fluorophenyl)(piperidin-1-yl)methanone

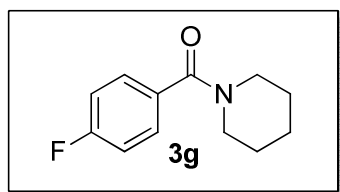

The reaction was performed following general procedures A and B, respectively. Procedure A: 7.25  $\mu$ M GOase M<sub>3-5</sub>, 10mM *para*-fluorobenzyl alcohol (**1g**), 24 h of reaction (aldehyde formation) followed by addition of 5 eq. piperidine and 6 % TBHP (v/v) and reaction for further 24 h. Procedure B: 12 U mL<sup>-1</sup> TvL/24 mM TEMPO, 80 mM *para*-fluorobenzyl alcohol (**1g**), 24 h of reaction (aldehyde formation) followed by addition of 5 eq. piperidine and 1.2 eq TBHP and reaction for further 24 h.

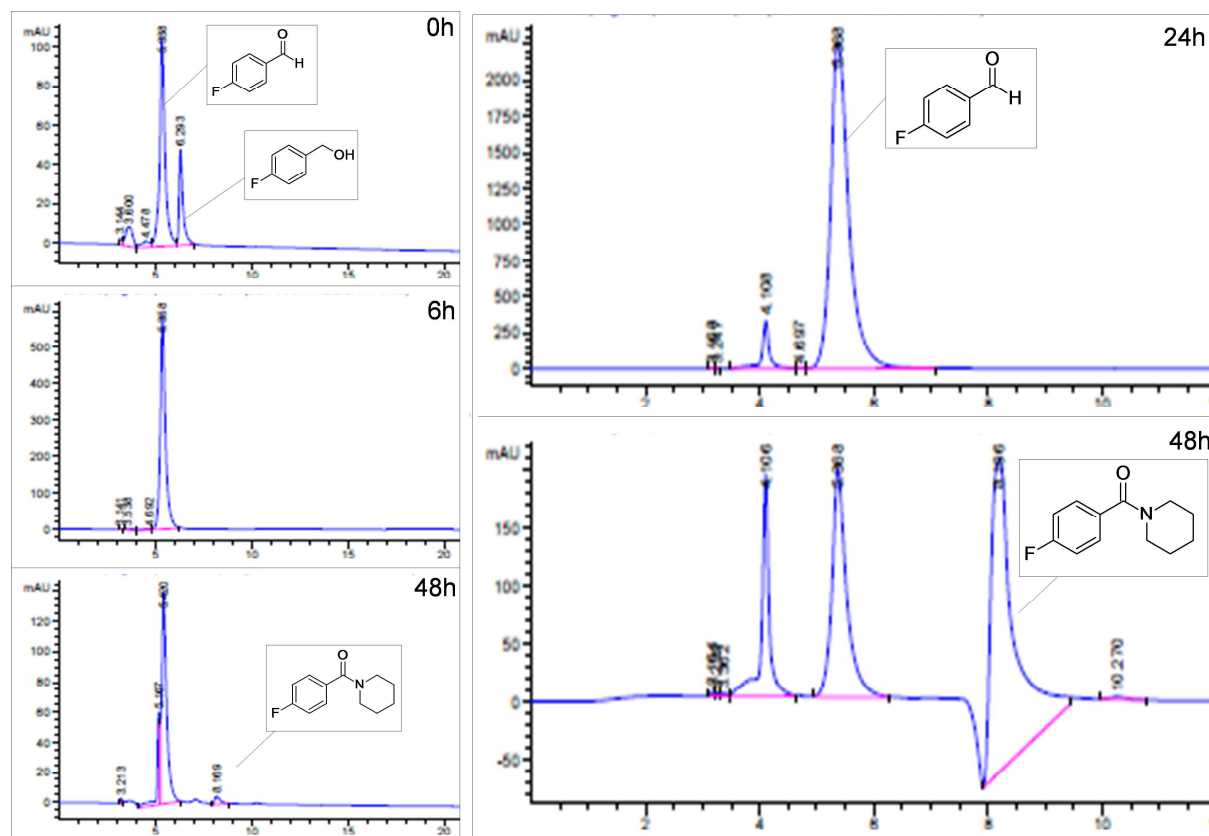

### (4-Methoxyphenyl)(piperidin-1-yl)methanone

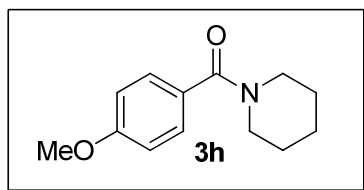

The reaction was performed following general procedure B, using 12 U mL<sup>-1</sup> TvL/24 mM TEMPO, 80 mM 4-methoxybenzyl alcohol (**1h**), 24 h of reaction (aldehyde formation) followed by addition of 5 eq. piperidine and 1.2 eq TBHP and reaction for further 24 h.

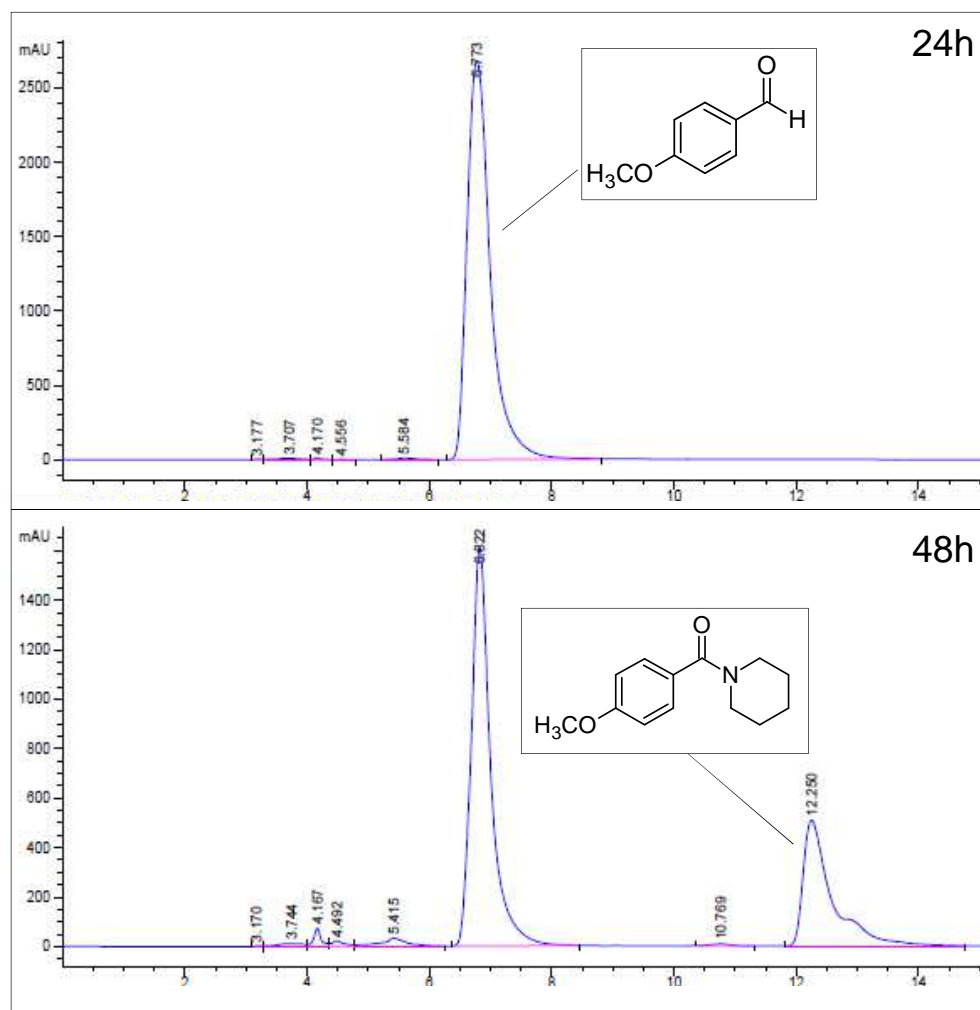

**Figure S8** HPLC traces of 4-methoxybenzyl alcohol (**1h**) oxidation using TvL/TEMPO (upper image) and subsequent amide formation reaction yielding (4-methoxy phenyl)(piperidin-1-yl)methanone **3h** (lower image). HPLC conditions: CHIRALPAK<sup>®</sup> IA column; flow rate 1.0 mL/min; UV 254 nm; eluent= hexane/iPrOH 90:10.

### (2-Methoxyphenyl)(piperidin-1-yl)methanone

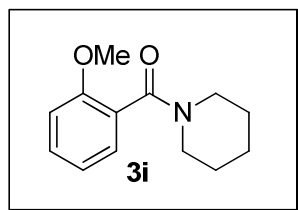

The reaction was performed following general procedure B, using 12 U mL<sup>-1</sup> TvL/24 mM TEMPO, 80 mM 2-methoxybenzyl alcohol (**1i**), 24 h of reaction (aldehyde formation) followed by addition of 5 eq. piperidine and 1.2 eq TBHP and reaction for further 24 h.

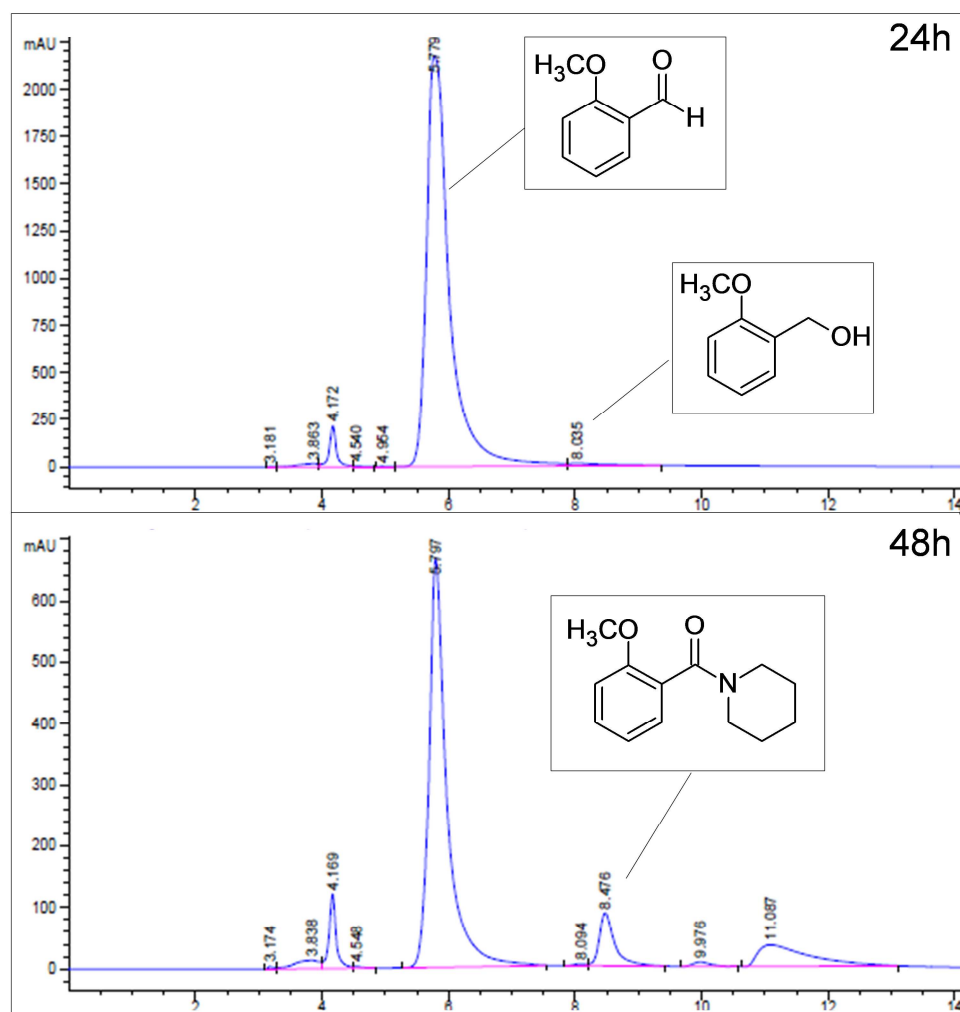

**Figure S9.** HPLC traces of 2-methoxybenzyl alcohol (**1i**) oxidation using TvL/TEMPO (upper image) and subsequent amide formation reaction yielding (2-methoxyphenyl)(piperidin-1-yl)methanone **3i** (lower image). HPLC conditions: CHIRALPAK<sup>®</sup> IA column; flow rate 1.0 mL/min; UV 254 nm; eluent= hexane/iPrOH 90:10. Peak at 4.169 min (24- and 48-h-image, right) is an unknown UV-active substance derived from TEMPO.

### (3-Chlorophenyl)(piperidin-1-yl)methanone

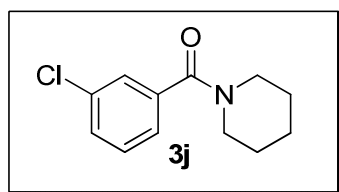

The reaction was performed following general procedures A and B, respectively. Procedure A: 7.25  $\mu$ M GOase M<sub>3-5</sub>, 10 mM 3-chlorobenzyl alcohol (**1j**), 24 h of reaction (aldehyde formation) followed by addition of 5 eq. piperidine and 6 % TBHP (v/v) and reaction for further 24 h. Procedure B: 12 U mL<sup>-1</sup> TvL/24 mM TEMPO, 80 mM 3-chlorobenzyl alcohol (**1j**), 24 h of reaction (aldehyde formation) followed by addition of 5 eq. piperidine and 1.2 eq TBHP and reaction for further 24 h.

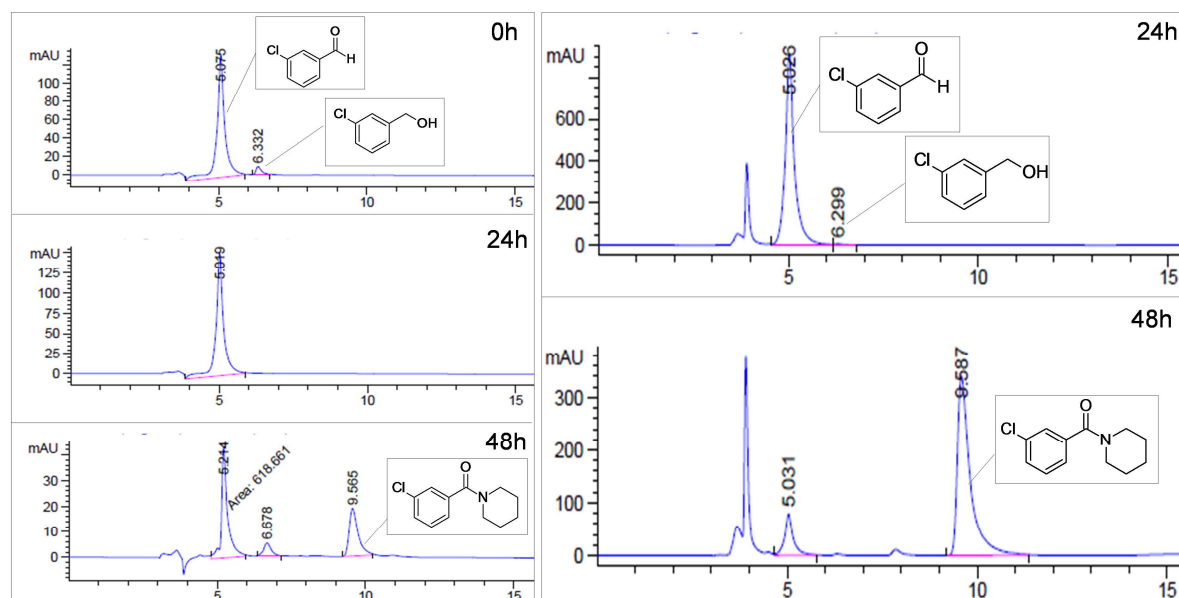

**Figure S10.** HPLC traces of 3-chlorobenzyl alcohol (**1j**) oxidation using GOase M<sub>3-5</sub> (left images) and TvL/TEMPO (right images) and subsequent amide formation reaction yielding (4-fluorophenyl)(piperidin-1-yl)methanone **3j** (respective 48-h-images at the bottom). HPLC conditions: CHIRALPAK<sup>®</sup> IA column; flow rate 1.0 mL/min; UV 254 nm; eluent= hexane/iPrOH 90:10.

## Naphthalen-2-yl(piperidin-1-yl)methanone

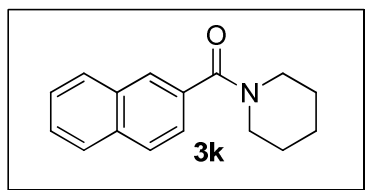

The reaction was performed following general procedures A and B, respectively. Procedure A: 7.25  $\mu\text{M}$  GOase M<sub>3-5</sub>, 10 mM 2-naphthalenemethanol (**1k**), 24 h of reaction (aldehyde formation) followed by addition of 5 eq. piperidine and 6 % TBHP (v/v) and reaction for further 24 h. Procedure B: 12 U mL<sup>-1</sup> TvL/24 mM TEMPO, 80 mM 2-naphthalenemethanol (**1k**), 24 h of reaction (aldehyde formation) followed by addition of 5 eq. piperidine and 1.2 eq TBHP and reaction for further 24 h.

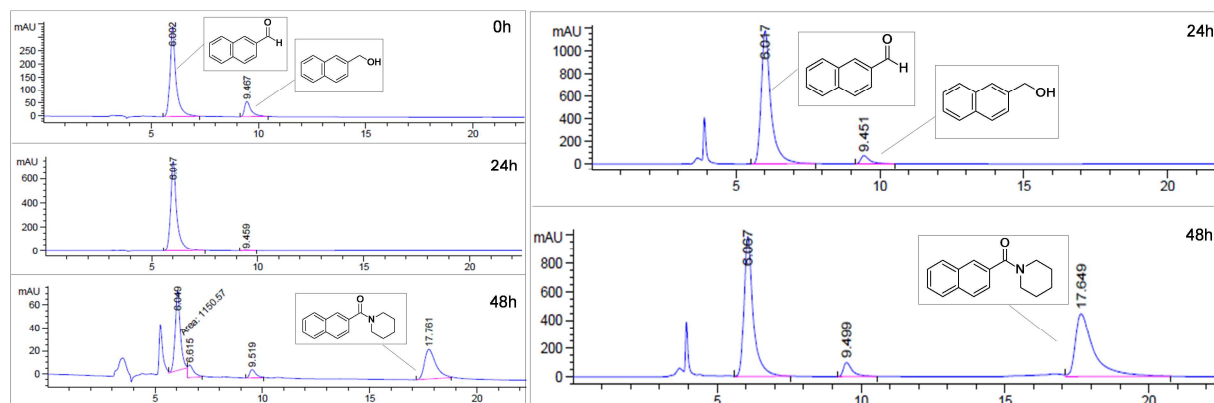

**Figure S11.** HPLC traces of 2-naphthalenemethanol (**1k**) oxidation using GOase M<sub>3-5</sub> (left images) and TvL/TEMPO (right images) and subsequent amide formation reaction yielding naphthalen-2-yl(piperidin-1-yl)methanone **3k** (respective 48-h-images at the bottom). HPLC conditions: CHIRALPAK® IA column; flow rate 1.0 mL/min; UV 254 nm; eluent= hexane/iPrOH 90:10. Peak at 5.167 (48-h-image, left) is an unknown UV-active substance derived from TBHP, whereas peak at 4.106 min (24- and 48-h-image, right) is an unknown UV-active substance derived from TEMPO.



**Table S1:** Conversions of benzyl alcohols **1a-k** to respective amides **3a-k** in GOase-catalysed reactions after 24 h of reaction in presence of 5 eq. amine and 6 % TBHP (general procedure A; percentages reported are based on HPLC peak areas at  $\lambda = 254$  nm).

| Reaction  | Concentration alcohols<br>1a-k [mM] | Alcohol [%] | Aldehyde [%] | Amide [%] |
|-----------|-------------------------------------|-------------|--------------|-----------|
| <b>3a</b> | 5                                   | 0           | 0            | 100       |
|           | 7.5                                 | 0           | 0            | 100       |
|           | 10                                  | 0           | 0            | 100       |
| <b>3b</b> | 5                                   | 0           | 81           | 19        |
|           | 7.5                                 | 0           | 14           | 86        |
|           | 10                                  | 0           | 13           | 87        |
| <b>3c</b> | 5                                   | 0           | 85           | 15        |
|           | 7.5                                 | 0           | 65           | 35        |
|           | 10                                  | 0           | 37           | 63        |
| <b>3d</b> | 5                                   | 0           | 97           | 3         |
|           | 7.5                                 | 0           | 91           | 9         |
|           | 10                                  | 0           | 74           | 26        |
| <b>3e</b> | 7                                   | 0           | 94           | 6         |
|           | 10                                  | 0           | 79           | 21        |
| <b>3f</b> | 5                                   | 0           | 98           | 2         |
|           | 7.5                                 | 0           | 93           | 7         |
|           | 10                                  | 0           | 86           | 14        |
| <b>3g</b> | 5                                   | 1           | 99           | 1         |
|           | 7.5                                 | 0           | 98           | 2         |
|           | 10                                  | 0           | 96           | 4         |
| <b>3h</b> | 5                                   | 0           | 100          | 0         |
|           | 7.5                                 | 2           | 98           | 0         |
|           | 10                                  | 6           | 94           | 0         |
| <b>3i</b> | 5                                   | 4           | 96           | 0         |
|           | 7.5                                 | 5           | 95           | 0         |
|           | 10                                  | 7           | 93           | 0         |
| <b>3j</b> | 10                                  | 8           | 56           | 36        |
| <b>3k</b> | 10                                  | 6           | 56           | 38        |

HPLC conditions: CHIRALPAK<sup>®</sup> IA column, flow rate 1.0 mL/min, UV 254 nm, eluent= hexane/iPrOH 90:10.

**Table S2:** Conversions of benzyl alcohols **1a-k** to respective amides **3a-k** in *T. versicolor*/TEMPO-mediated reactions after 24 h of reaction in presence of 5 eq. amine and 1.2 eq. % TBHP (general procedure B; percentages reported are based on HPLC peak areas at  $\lambda = 254$  nm).

| Reaction  | Concentration alcohols<br>1a-k [mM] | Alcohol [%] | Aldehyde [%] | Amide [%] |
|-----------|-------------------------------------|-------------|--------------|-----------|
| <b>3a</b> | 20                                  | 94          | 0            | 6         |
|           | 50                                  | 38          | 0            | 62        |
|           | 80                                  | 9           | 0            | 91        |
| <b>3b</b> | 20                                  | 0           | 45           | 47        |
|           | 50                                  | 0           | 1            | 93        |
|           | 80                                  | 0           | 6            | 89        |
| <b>3c</b> | 20                                  | 11          | 39           | 22        |
|           | 50                                  | 0           | 7            | 93        |
|           | 80                                  | 0           | 10           | 90        |
| <b>3d</b> | 20                                  | 0           | 94           | 6         |
|           | 50                                  | 0           | 22           | 76        |
|           | 80                                  | 0           | 14           | 86        |
| <b>3e</b> | 20                                  | 2           | 98           | 0         |
|           | 50                                  | 4           | 84           | 12        |
|           | 80                                  | 6           | 62           | 32        |
| <b>3f</b> | 20                                  | 1           | 95           | 4         |
|           | 50                                  | 0           | 35           | 53        |
|           | 80                                  | 0           | 23           | 75        |
| <b>3g</b> | 20                                  | 1           | 96           | 3         |
|           | 50                                  | 0           | 61           | 39        |
|           | 80                                  | 0           | 31           | 69        |
| <b>3h</b> | 20                                  | 7           | 94           | 0         |
|           | 50                                  | 0           | 90           | 7         |
|           | 80                                  | 0           | 68           | 26        |
| <b>3i</b> | 20                                  | 0           | 95           | 2         |
|           | 50                                  | 0           | 76           | 9         |
|           | 80                                  | 0           | 78           | 9         |
| <b>3j</b> | 80                                  | 0           | 13           | 87        |
| <b>3k</b> | 80                                  | 5           | 50           | 45        |

HPLC conditions: CHIRALPAK<sup>®</sup> IA column, flow rate 1.0 mL/min, UV 254 nm, eluent = hexane/iPrOH 90:10.

### 3.5 Preparative scale reactions according to general procedures B

All the reactions were performed following general procedure B: 12 U mL<sup>-1</sup> TvL/24 mM TEMPO, 80 mM of the respective alcohol, 24 h of reaction (aldehyde formation) followed by addition of 5 eq. piperidine or methylpiperazine and 1.2 eq TBHP and then reaction for further 24 h (amide formation). The reaction mixture was extracted with CH<sub>2</sub>Cl<sub>2</sub> (1 x 5 mL). The organic phase was dried over MgSO<sub>4</sub> and concentrated under vacuum. Purification conditions and yields are reported for each amide.

#### (4-Nitrophenyl)(piperidin-1-yl)methanone

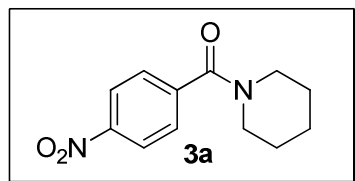

Purification with silica gel chromatography (eluent EtOAc) led to desired amide **3a**<sup>8</sup> (yellow solid) in 92 % yield.

#### HPLC analysis of purified **3a**

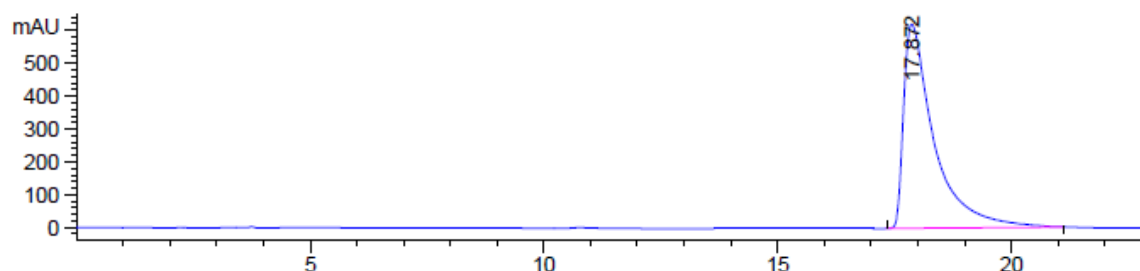

**Figure S12.** HPLC trace. HPLC conditions: CHIRALPAK® IA column; flow rate 1.0 mL/min; UV 254 nm; eluent= hexane/iPrOH 90:10.

#### <sup>1</sup>H-NMR analysis of purified **3a**

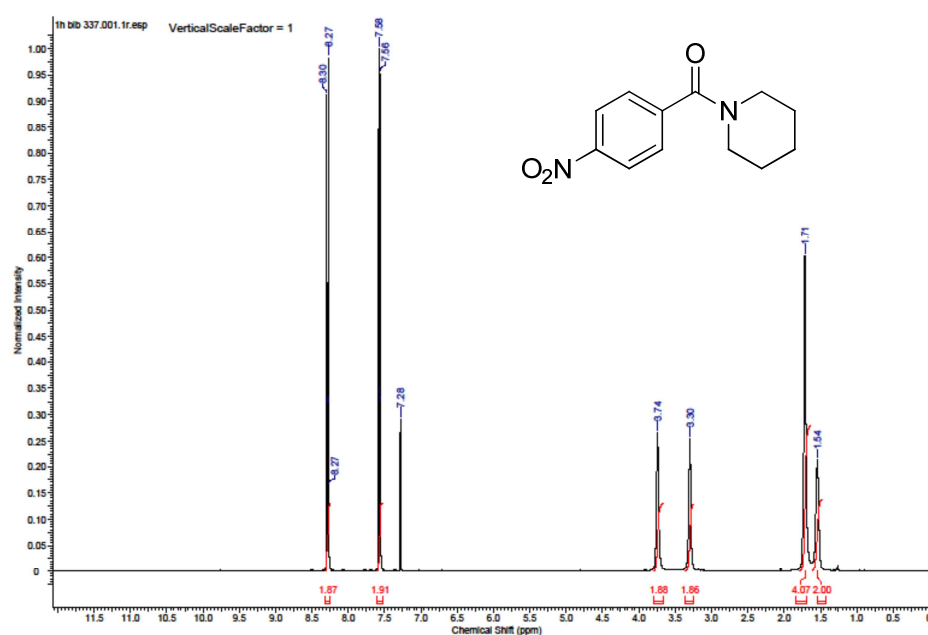

**Figure S13.** <sup>1</sup>H-NMR spectrum (400 MHz, CDCl<sub>3</sub>) of compound **3a**.

### Piperidin-1-yl[4-(trifluoromethyl)phenyl]methanone

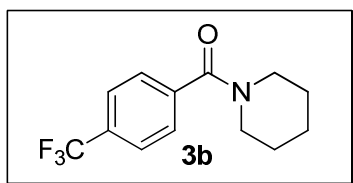

Purification with silica gel chromatography (eluent EtOAc 9:1 MeOH) led to desired amide **3b**<sup>9</sup> (colourless oil) in 57 % yield.

### HPLC analysis of purified **3b**

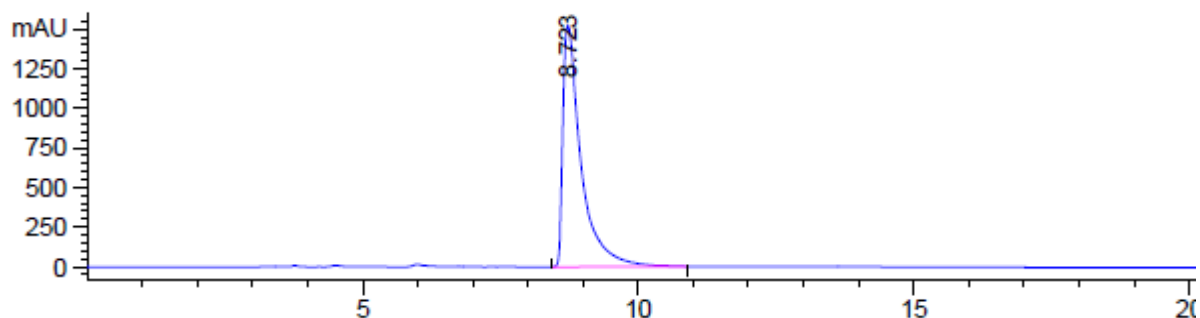

**Figure S14.** HPLC trace. HPLC conditions: CHIRALPAK<sup>®</sup> IA column; flow rate 1.0 mL/min; UV 254 nm; eluent= hexane/iPrOH 90:10.

### <sup>1</sup>H-NMR analysis of purified **3b**

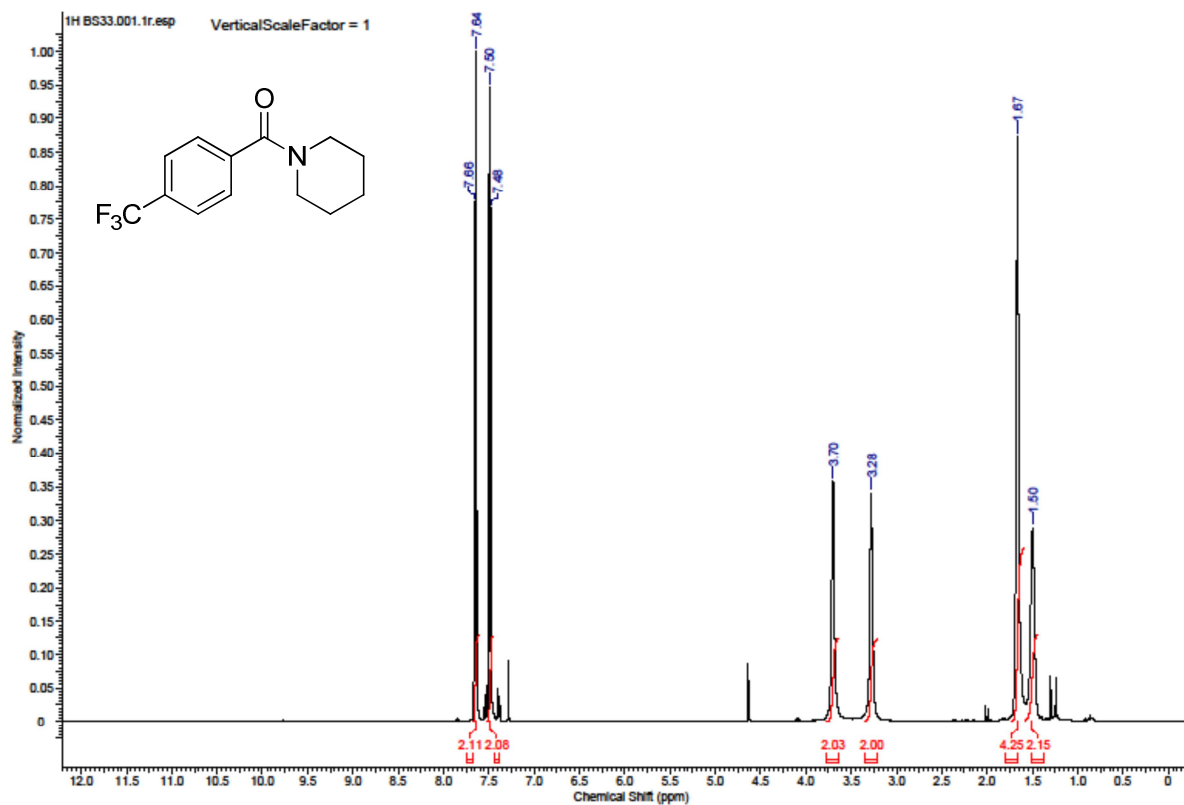

**Figure S15.** <sup>1</sup>H-NMR spectrum (400 MHz, CDCl<sub>3</sub>) of compound **3b**.

### (4-Iodophenyl)(piperidin-1-yl)methanone

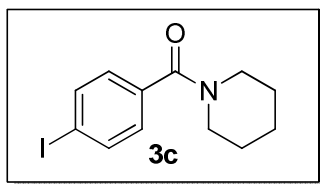

Purification with silica gel chromatography (eluent EtOAc 8:2 cyclohexane) led to desired amide **3c**<sup>10</sup> (white solid) in 60 % yield.

### HPLC analysis of purified **3c**

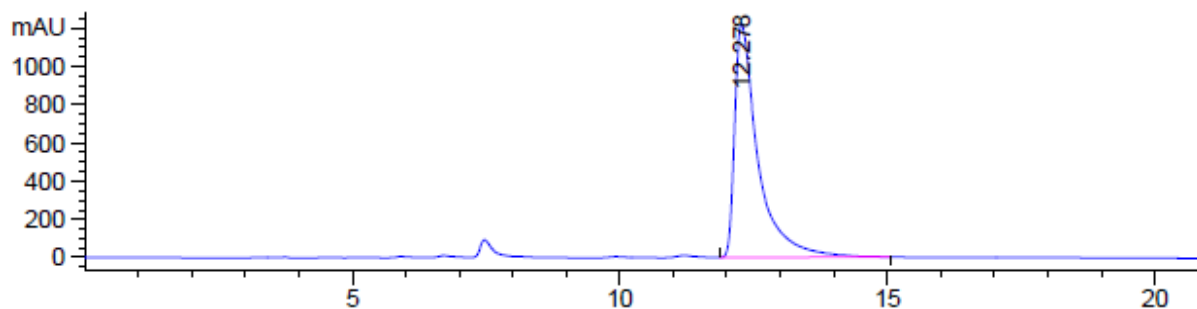

**Figure S16.** HPLC trace. HPLC conditions: CHIRALPAK® IA column; flow rate 1.0 mL/min; UV 254 nm; eluent= hexane/iPrOH 90:10.

### <sup>1</sup>H-NMR analysis of purified **3c**

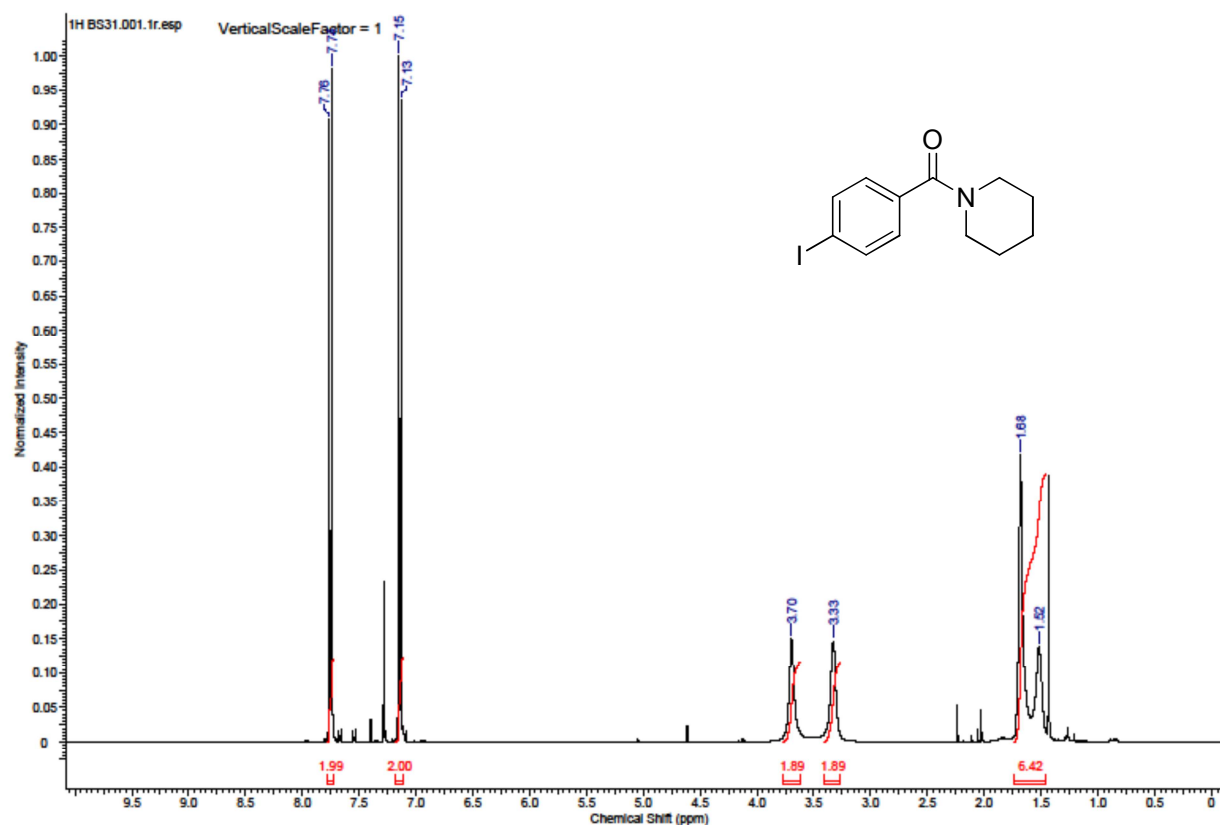

**Figure S17.** <sup>1</sup>H-NMR spectrum (400 MHz, CDCl<sub>3</sub>) of compound **3c**.

### (4-Bromophenyl)(piperidin-1-yl)methanone

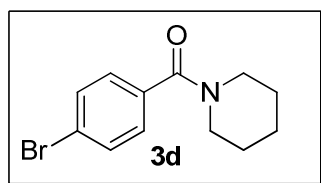

Purification with silica gel chromatography (eluent EtOAc 7:3 cyclohexane) led to desired amide **3d**<sup>11</sup> (white solid) in 73 % yield.

### HPLC analysis of purified **3d**

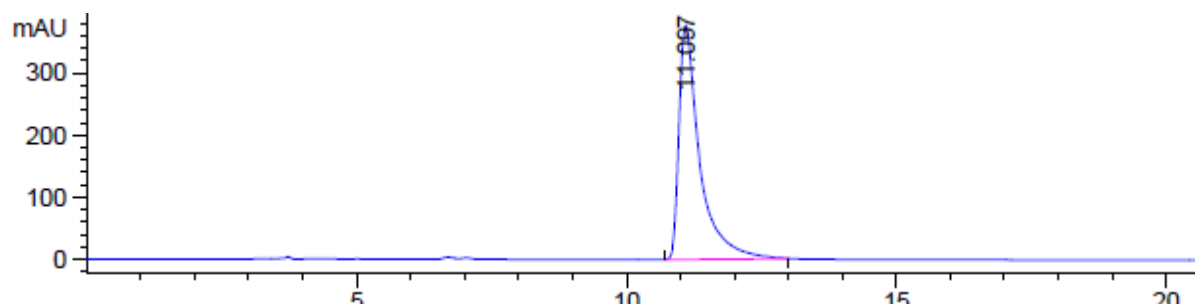

**Figure S18.** HPLC trace. HPLC conditions: CHIRALPAK<sup>®</sup> IA column; flow rate 1.0 mL/min; UV 254 nm; eluent= hexane/iPrOH 90:10.

### <sup>1</sup>H-NMR analysis of purified **3d**

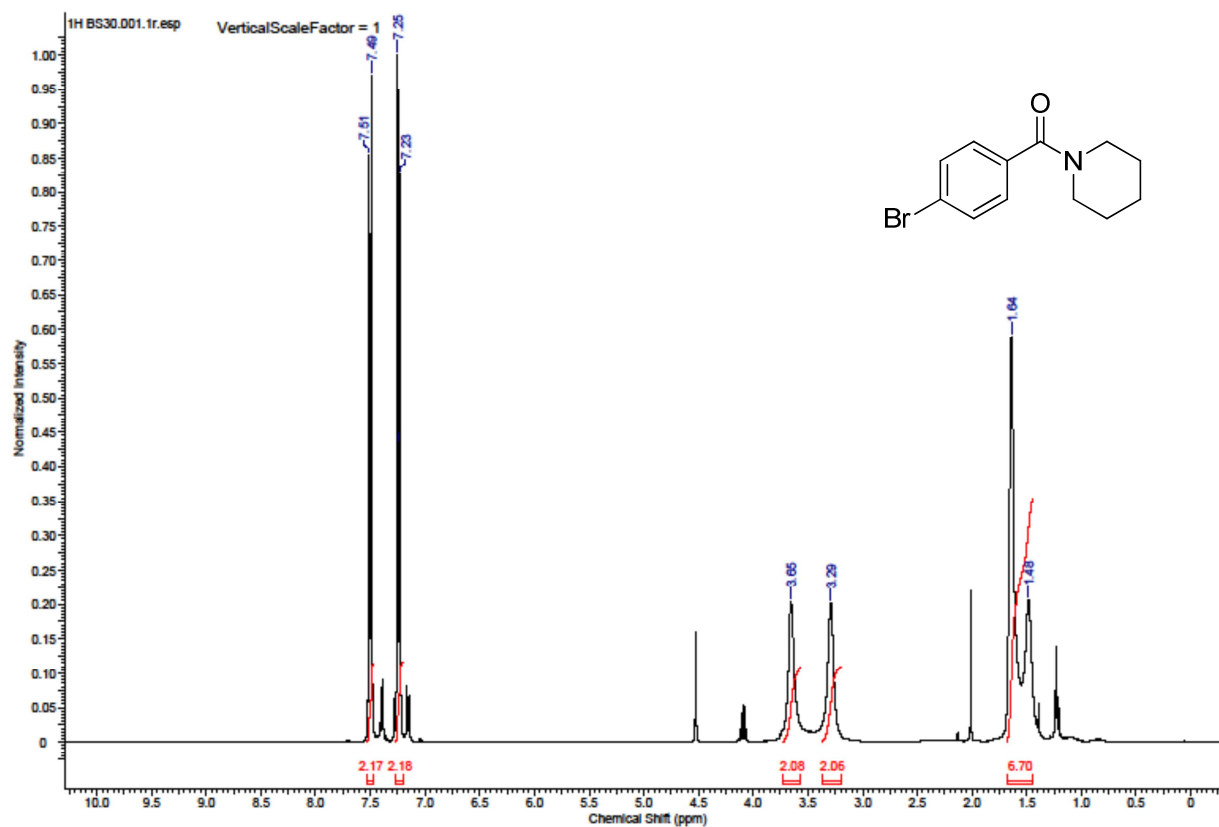

**Figure S19.** <sup>1</sup>H-NMR spectrum (400 MHz, CDCl<sub>3</sub>) of compound **3d**.

### (4-Chlorophenyl)(piperidin-1-yl)methanone

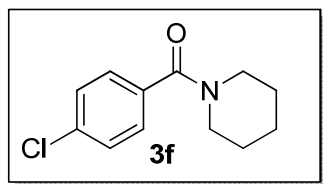

Purification with silica gel chromatography (eluent EtOAc 7:3 cyclohexane) led to desired amide **3f**<sup>12</sup> (colourless oil) in 53 % yield.

### HPLC analysis of purified **3f**

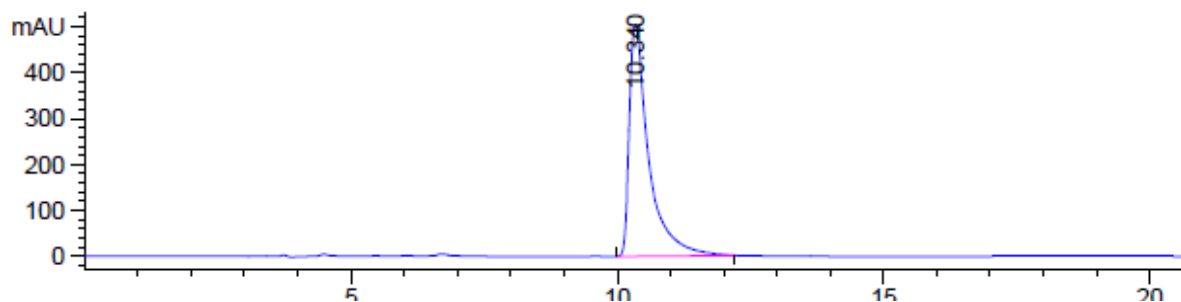

**Figure S20.** HPLC trace. HPLC conditions: CHIRALPAK<sup>®</sup> IA column; flow rate 1.0 mL/min; UV 254 nm; eluent= hexane/iPrOH 90:10.

### <sup>1</sup>H-NMR analysis of purified **3f**

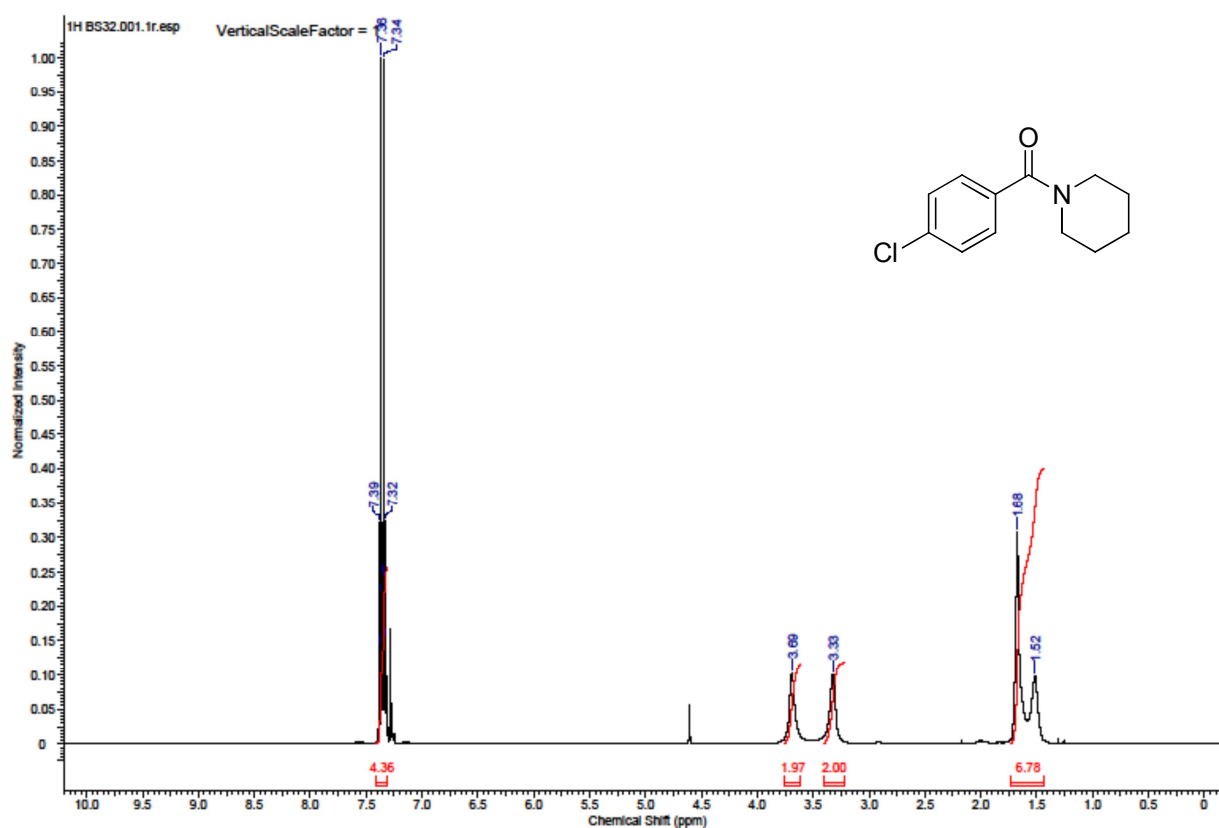

**Figure S21.** <sup>1</sup>H-NMR spectrum (400 MHz, CDCl<sub>3</sub>) of compound **3f**.

### (4-Methoxyphenyl)(piperidin-1-yl)methanone

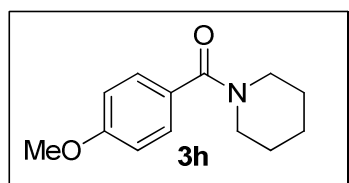

Purification with silica gel chromatography (eluent EtOAc 5:5 cyclohexane) led to desired amide **3h**<sup>11</sup> (yellow oil) in 22 % yield.

### HPLC analysis of purified **3h**

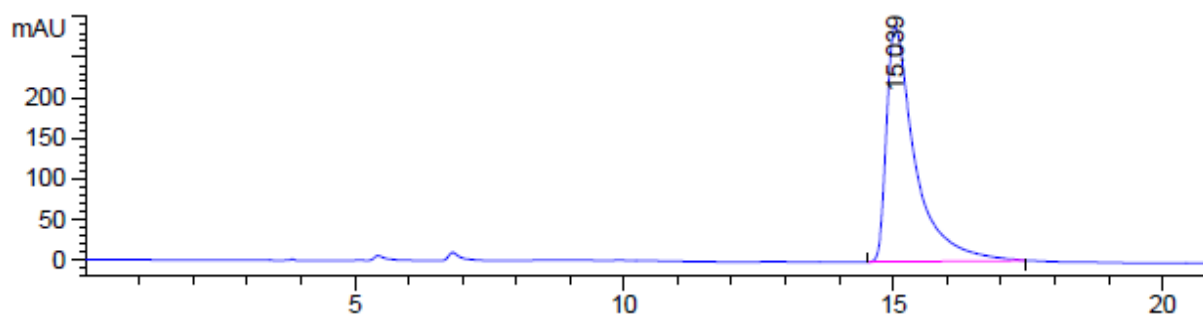

**Figure S22.** HPLC trace. HPLC conditions: CHIRALPAK® IA column; flow rate 1.0 mL/min; UV 254 nm; eluent= hexane/iPrOH 90:10.

### <sup>1</sup>H-NMR analysis of purified **3h**

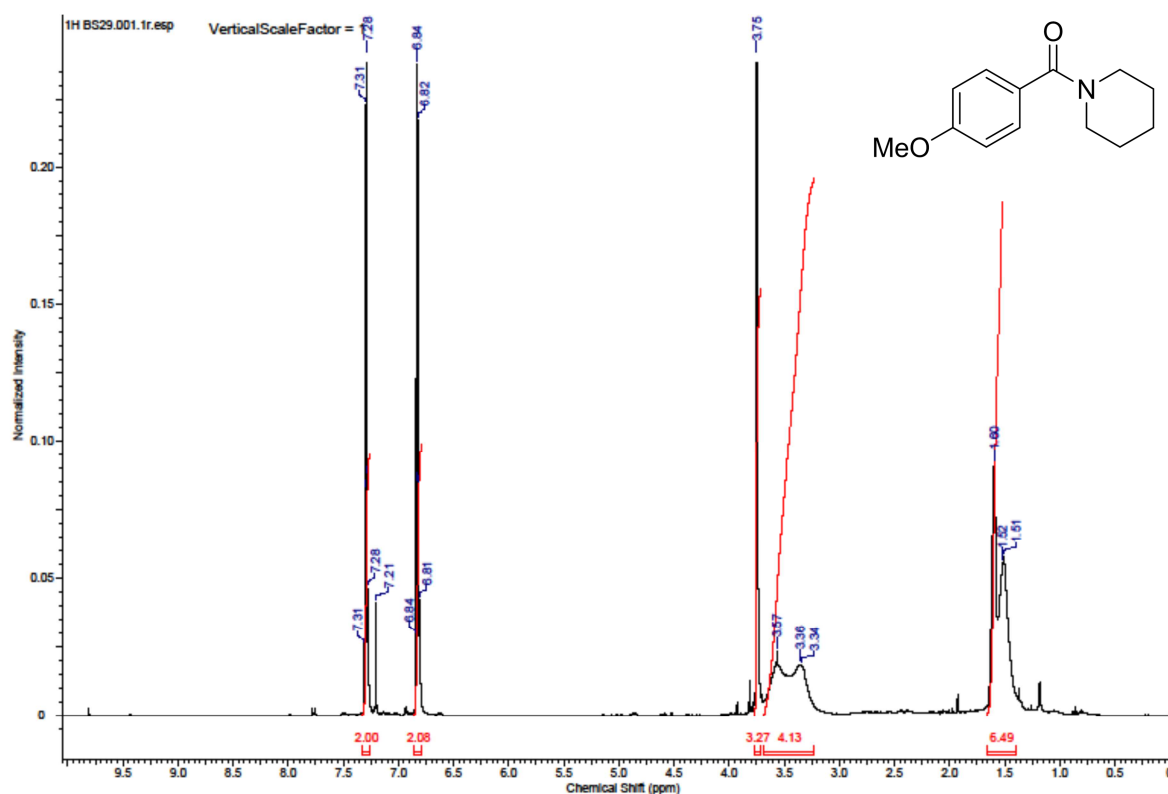

**Figure S23.** <sup>1</sup>H-NMR spectrum (400 MHz, CDCl<sub>3</sub>) of compound **3h**.



### (3-Chlorophenyl)(piperidin-1-yl)methanone

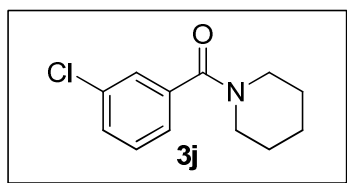

Purification with silica gel chromatography (eluent EtOAc) led to desired amide **3j**<sup>12</sup> (yellow oil) in 41 % yield.

### HPLC analysis of purified **3j**

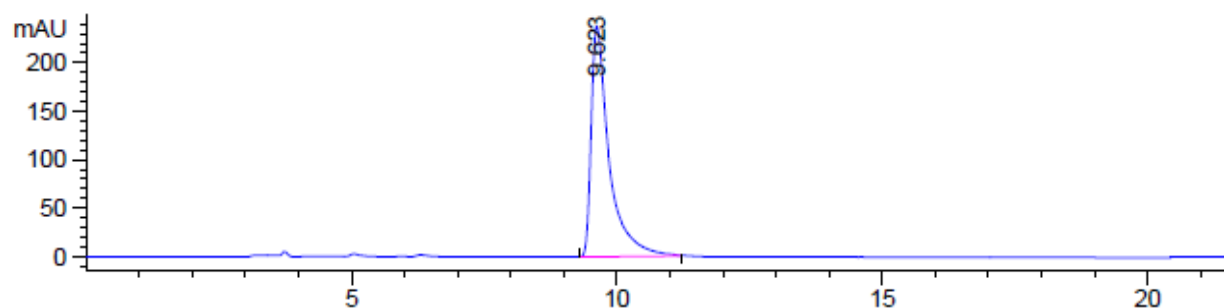

**Figure S24.** HPLC trace. HPLC conditions: CHIRALPAK® IA column; flow rate 1.0 mL/min; UV 254 nm; eluent= hexane/iPrOH 90:10.

### <sup>1</sup>H-NMR analysis of purified **3j**

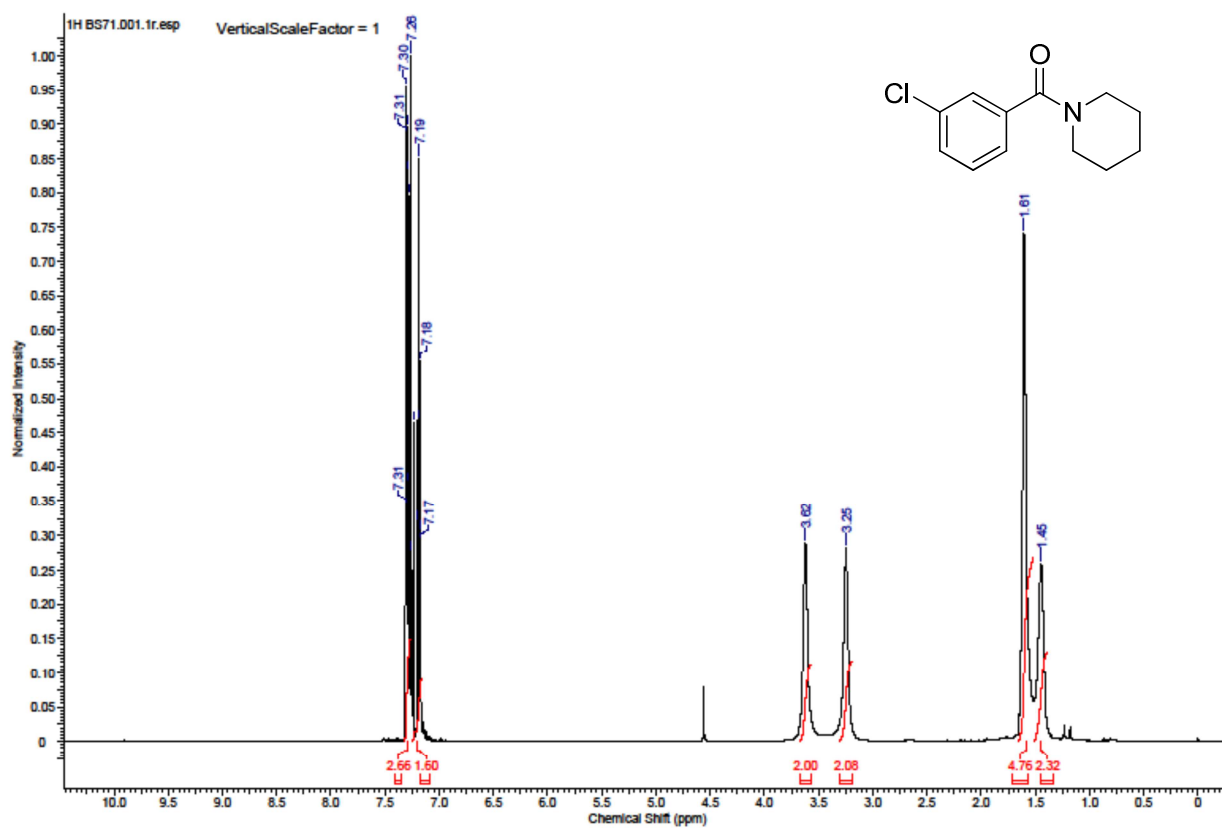

**Figure S25.** <sup>1</sup>H-NMR spectrum (400 MHz, CDCl<sub>3</sub>) of compound **3j**.

## Naphthalen-2-yl(piperidin-1-yl)methanone

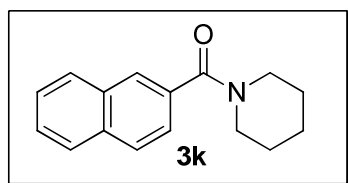

Purification with silica gel chromatography (eluent EtOAc) led to desired amide **3k**<sup>11</sup> (white solid) in 35 % yield.

### HPLC analysis of purified **3k**

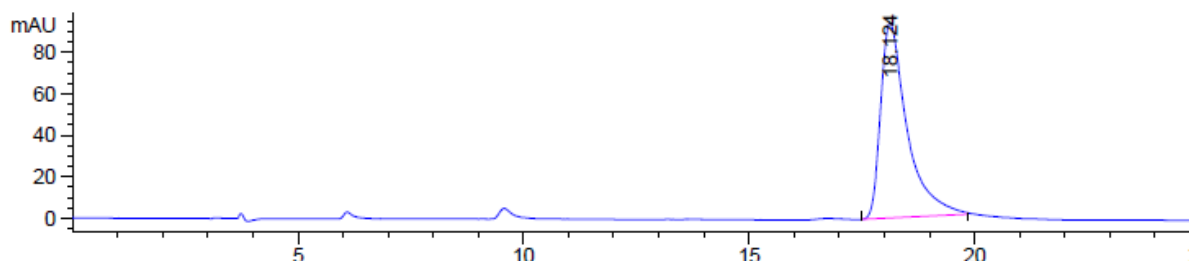

**Figure S26.** HPLC trace. HPLC conditions: CHIRALPAK<sup>®</sup> IA column; flow rate 1.0 mL/min; UV 254 nm; eluent= hexane/iPrOH 90:10.

### <sup>1</sup>H-NMR analysis of purified **3k**

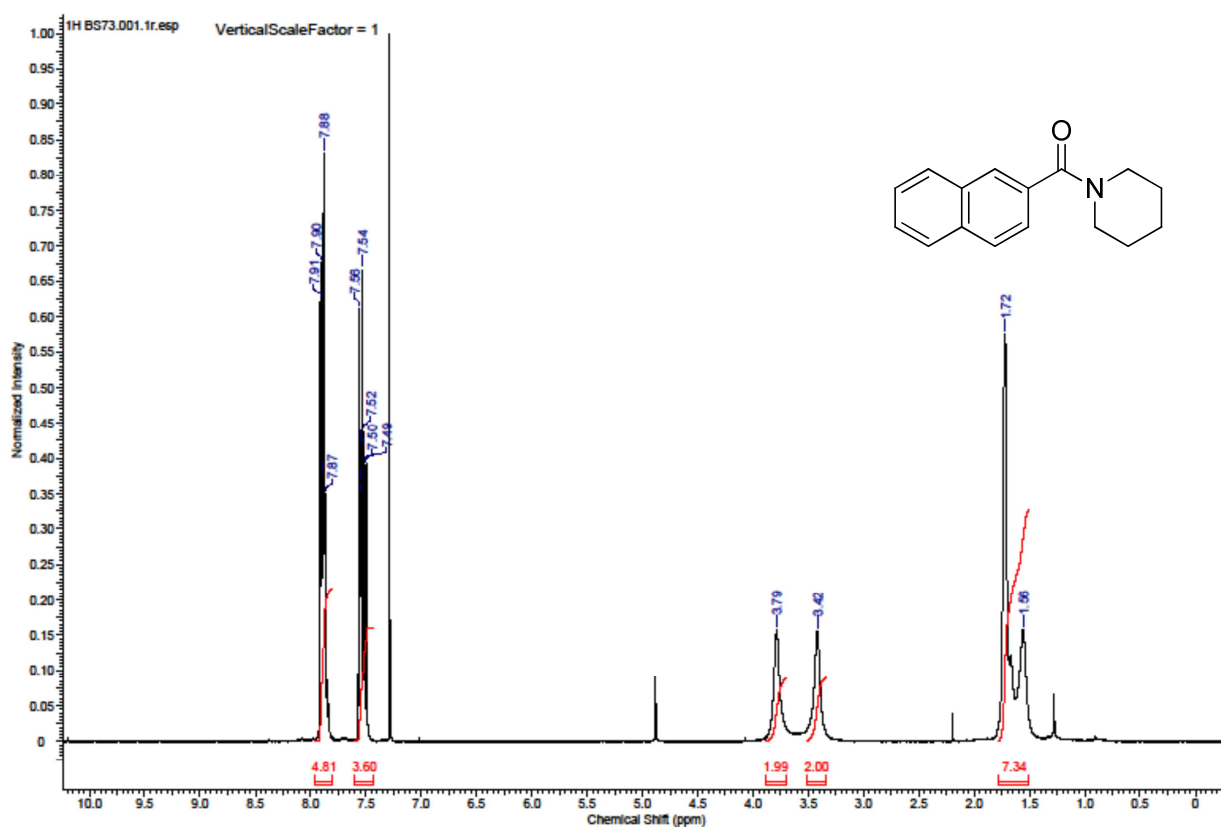

**Figure S27.** <sup>1</sup>H-NMR spectrum (400 MHz, CDCl<sub>3</sub>) of compound **3k**.

#### 4-Methylpiperazin-1-yl)[4-(trifluoromethyl)phenyl]methanone

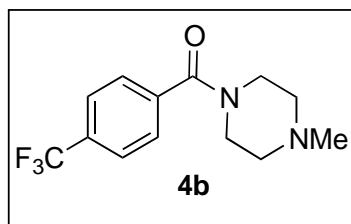

Purification with silica gel chromatography (eluent EtOAc 8:2 MeOH) led to desired amide **4b** (colourless oil) in 23 % yield.).  $^1\text{H}$  NMR, 800 MHz,  $\text{CDCl}_3$   $\delta$  ppm: 7.71 (d,  $J = 8.2$  Hz, 2H), 7.54 (d,  $J = 8.2$  Hz, 2H), 3.85 (bs, 2H), 3.43 (bs, 2H), 2.55 (bs, 2H), 2.39 (bs, 2H), 2.36 (s, 3H);  $^{13}\text{C}$  NMR, 200 MHz,  $\text{CDCl}_3$   $\delta$  ppm: 168.8, 139.3, 131.8, 127.5, 125.6, 125.1, 124.3, 123.0, 55.1, 54.6, 47.4, 45.9, 42.0, 29.7.

#### $^1\text{H}$ -NMR analysis of purified **4b**

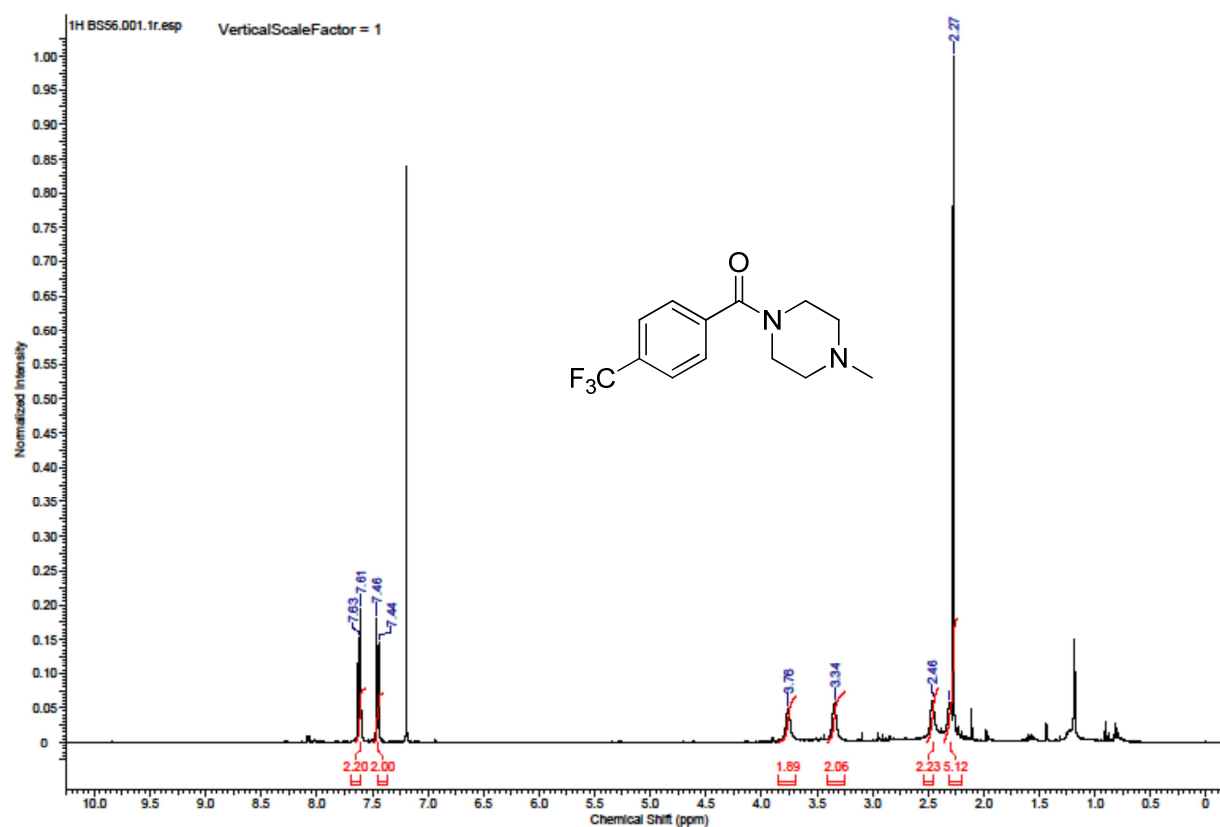

Figure S28.  $^1\text{H}$ -NMR spectrum (800 MHz,  $\text{CDCl}_3$ ) of compound **4b**.

#### 4. Cascade 2 - GOase M<sub>3.5</sub>- *E.coli* XDH catalysed oxidation of benzyl alcohols to acids

##### 4.1 Screening of *E. coli* XDH towards a diverse set of selected aldehyde substrates using NBT

The screening of *E. coli* xanthine dehydrogenase was accomplished using a 96-well, clear, flat-bottomed polystyrene microtitre plate in a final volume of 200  $\mu$ L in potassium phosphate buffer (50 mM, pH 7.6) containing per well: 1 mM of the respective substrate, 2.5 mM NBT, 20  $\mu$ L XDH solution (1.1 mg/mL stock solution). The activity of *E. coli* XDH towards the compounds tested was assessed by eye based on the intensity of colour development in a defined time-frame and in relation to the activity obtained for the natural substrate xanthine, assuming xanthine = 100 %.

**Table S3:** Activity of *E. coli* xanthine dehydrogenase towards a diverse set of aldehyde substrates using the NBT assay. Activity as good as with natural substrate xanthine: +++; good activity: ++; moderate to low activity: +; no activity: -.

| Substrate                     | Structure                                                                           | Relative activity compared to natural substrate xanthine |
|-------------------------------|-------------------------------------------------------------------------------------|----------------------------------------------------------|
| Xanthine                      | 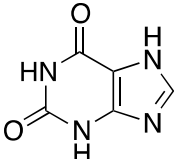   | +++                                                      |
| Benzaldehyde                  |   | +++                                                      |
| Isophthalaldehyde             |  | +                                                        |
| Terephthalaldehyde            |  | +                                                        |
| Benzene-1,3,5-tricarbaldehyde |  | -                                                        |
| Phthaldialdehyde              |  | -                                                        |

|                          |                                                                                     |     |
|--------------------------|-------------------------------------------------------------------------------------|-----|
| 4-Bromobenzaldehyde      | 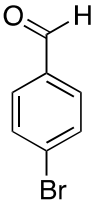   | +   |
| 2-Bromobenzaldehyde      |    | ++  |
| 2-Chlorobenzaldehyde     |    | +++ |
| 3-Chlorobenzaldehyde     |    | ++  |
| 4-Chlorobenzaldehyde     |   | +   |
| 2,4-Dichlorobenzaldehyde |  | -   |
| 3,5-Dichlorobenzaldehyde |  | ++  |
| 2,6-Dichlorobenzaldehyde |  | ++  |
| 2-Fluorobenzaldehyde     |  | ++  |
| 3-Fluorobenzaldehyde     |  | ++  |

|                                |                                                                                     |     |
|--------------------------------|-------------------------------------------------------------------------------------|-----|
| 2-Trifluoromethylbenzaldehyde  | 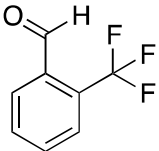   | -   |
| 4-Trifluoromethylbenzaldehyde  |    | -   |
| 4-Trifluoromethoxybenzaldehyde |    | -   |
| 3-Fluoro-4-methoxybenzaldehyde |   | -   |
| 4-Tolualdehyde                 |  | ++  |
| 2-Tolualdehyde                 |  | +   |
| 4-Methoxybenzaldehyde          |  | +   |
| 2-Methoxybenzaldehyde          |  | ++  |
| 3-Methoxybenzaldehyde          |  | +++ |

|                                  |                                                                                     |     |
|----------------------------------|-------------------------------------------------------------------------------------|-----|
| 2,4-Dimethoxybenzaldehyde        | 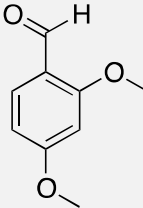   | -   |
| 2,6-Dimethoxybenzaldehyde        |    | -   |
| 3,4-Dimethoxybenzaldehyde        |    | -   |
| 3,4,5-Trimethoxybenzaldehyde     |    | -   |
| 2,3,4-Trimethoxybenzaldehyde     |   | -   |
| Vanillin                         |  | ++  |
| 3-Hydroxy-4-methoxy-benzaldehyde |  | -   |
| 2-Hydroxy-5-methoxy-benzaldehyde |  | +   |
| 3-Hydroxybenzaldehyde            |  | +++ |

|                              |                                                                                     |     |
|------------------------------|-------------------------------------------------------------------------------------|-----|
| 4-Hydroxybenzaldehyde        | 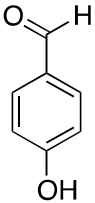   | ++  |
| 3,4-Dihydroxybenzaldehyde    |    | -   |
| 2,4,6-Trihydroxybenzaldehyde |    | -   |
| 4-Nitrobenzaldehyde          |   | +++ |
| 2-Nitrobenzaldehyde          |  | -   |
| 3-Nitrobenzaldehyde          |  | -   |
| 4-Dimethoxyaminobenzaldehyde |  | -   |
| 4-Methylthiobenzaldehyde     |  | -   |
| Pyridine-2-carboxaldehyde    |  | -   |



|                               |                                                                                     |   |
|-------------------------------|-------------------------------------------------------------------------------------|---|
| 3-Pyridinecarboxaldehyde      | 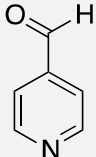   | + |
| Quinoline                     |    | - |
| 2-Napthaldehyde               |    | - |
| 3-Phenylbenzaldehyde          |    | - |
| 2-Phenylpropionaldehyde       |   | - |
| 3-Phenylbutaraldehyde         |  | - |
| <i>trans</i> -Cinnamaldehyde  |  | - |
| 4-Pentenal                    |  | - |
| Valeraldehyde                 |  | - |
| <i>trans</i> -2-Hexenal       |  | - |
| Glutaric dialdehyde           |  | - |
| DL-Glyceraldehyde             |  | - |
| Glyceraldehyde dimethylacetal |  | - |

|                                |                                                                                    |    |
|--------------------------------|------------------------------------------------------------------------------------|----|
| Dimethoxyacetaldehyde          | 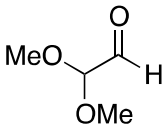  | -  |
| 2-Cyclohexen-1-one             |   | -  |
| 1-Cyclohexene-1-carboxaldehyde |   | -  |
| 2-Thiophencarboxaldehyde       |   | ++ |
| Benzyl O-tosyl oxime           |  | -  |

#### 4.2. General method for bio-bio-catalytic cascade reaction for synthesis of acids **5** from alcohols **1** in a one-pot one-step approach

To a 1-mL-Eppendorf tube was added 69  $\mu\text{L}$  of 50 mM NaPi buffer pH 7.6, 75  $\mu\text{L}$  catalase (1 mg/mL), 3  $\mu\text{L}$  of substrate (100 mM stock in MeCN), 50  $\mu\text{L}$  of *E. coli* XDH (1.1 mg/mL) and 103  $\mu\text{L}$  of GOase M<sub>3-5</sub> (3.7 mg/mL). The reaction was left in an incubator at 37 °C, shaken periodically and left overnight. 100  $\mu\text{L}$  of the reaction mixture was acidified with 20  $\mu\text{L}$  of 2 M HCl, centrifuged for 1 min at 13000 rpm and analysed by RP-HPLC.

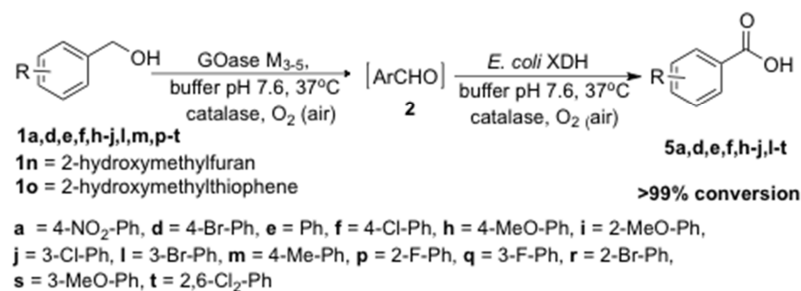

**Table S4:** Galactose oxidase M<sub>3-5</sub>- *E. coli* xanthine dehydrogenase cascade reactions for formation of acids from alcohols in a one-pot one-step approach. Substrates, HPLC-retention times of alcohols, aldehydes and acid and percentage of conversions after 16 h based on HPLC peak areas ( $\lambda = 254$  nm).

| Entry | Substrate | Retention time alcohol [min] | Retention time aldehyde [min] | Retention time acid [min] | Conversion Alc:Alid:Acid [10 mM] | HPLC conditions |
|-------|-----------|------------------------------|-------------------------------|---------------------------|----------------------------------|-----------------|
| 1     |           | 6.4                          | 14.0                          | 10.06                     | 0:0:100                          | A               |
| 2     |           | 5.4                          | 10.94                         | 8.9                       | 0:0:100                          | A               |
| 3     |           | 3.05                         | 5.98                          | 4.08                      | 0:0:100                          | B               |
| 4     |           | 4.7                          | 4.4                           | 2.1                       | 0:100:0                          | A               |
| 5     |           | 4.4                          | 9.02                          | 6.5                       | 0:0:100                          | B               |

|    |                                                                                     |      |     |      |         |   |
|----|-------------------------------------------------------------------------------------|------|-----|------|---------|---|
| 6  | 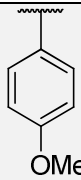   | 2.5  | 5.2 | 3.4  | 0:0:100 | A |
| 7  |    | 2.9  | 5.7 | 2.77 | 0:0:100 | A |
| 8  |    | 5.1  | 5.9 | -    | 0:0:100 | C |
| 9  |    | 2.73 | 5.4 | 2.37 | 0:0:100 | E |
| 10 |    | 3.1  | 5.3 | 4.6  | 0:0:100 | A |
| 11 |    | 3.1  | 4.5 | 4.9  | 0:0:100 | D |
| 12 |   | 2.82 | 5.4 | 4.5  | 0:0:100 | A |
| 13 |  | 3.1  | 6.0 | 4.6  | 0:0:100 | A |
| 14 |  | 3.8  | 7.7 | 5.1  | 0:0:100 | B |
| 15 |  | 4.0  | 8.9 | 3.5  | 0:0:100 | B |
| 16 |  | 4.0  | 8.9 | 3.5  | 0:0:100 | A |

HPLC conditions: ThermoFisherHypurity C-18 column, flow rate 1.0 mL/min, UV 254 nm, Method A: 25% MeCN: 75% water + 0.1% TFA; Method B: 25% MeCN: 75% water + 0.1% TFA; Method C: 1% MeCN : 99% water + 0.1% TFA; Method D: 15% MeCN : 85% water + 0.1% TFA; Method E: 40% MeCN: 60% water + 0.1% TFA.

### 4.3. Optimisation of the bio-biocatalytic cascade for synthesis of 3-methoxybenzoic acid **5s** from 3-methoxybenzyl alcohol **1s** in a one-pot one-step approach

In a 1-mL-Eppendorf was added 50 mM NaPi buffer pH 7.6, catalase (stock 1 mg/mL), 3-methoxybenzyl alcohol (10-100 mM), 50  $\mu$ L of *E. coli* XDH (1.1 mg/mL) and 103  $\mu$ L of GOase M<sub>3-5</sub> (3.7 mg/mL). The reaction was left in a shaking incubator at 36 °C. The reaction was periodically opened to air, closed and shaken to oxygenate the buffer and put back into the incubator. After the indicated time 50  $\mu$ L of the reaction mixture was acidified with 20  $\mu$ L of 2 M HCl, centrifuged and analysed by RP-HPLC. Conversion reported are based on relative response factors determined *via* NMR-HPLC correlations (cf. Figures S29-32).

**Table S5:** Optimisation of the galactose oxidase M<sub>3-5</sub>- *E. coli* XDH cascade reaction for formation of 3-methoxybenzoic acid **5s** from 3-methoxybenzyl alcohol **1s** in a one-pot one-step approach. Substrates, HPLC-retention times of alcohols, aldehydes and acid and percentage of conversions after 16 h based on HPLC peak areas ( $\lambda$  = 254 nm). 10 - 100mM scale.

| Entry | Concentration<br>3-methoxybenzyl<br>alcohol [mM] | Additive | $\mu$ L of catalase added<br>[1.1 mg/mL stock] | Reaction<br>time [h] | Yield [%]                          |
|-------|--------------------------------------------------|----------|------------------------------------------------|----------------------|------------------------------------|
| 1     | 10                                               | -        | 75                                             | 1                    | 100 <sup>a</sup>                   |
| 2     | 20                                               | -        | 75                                             | 2                    | 100 <sup>a</sup>                   |
| 3     | 40                                               | -        | 75                                             | 16                   | 82 <sup>a</sup>                    |
| 4     | 40                                               | 5% IPA   | 75                                             | 16                   | 69 <sup>a</sup>                    |
| 5     | 40                                               | 15% IPA  | 75                                             | 16                   | 21 <sup>a</sup>                    |
| 6     | 40                                               | -        | 100                                            | 5                    | 94 <sup>a</sup> (81 <sup>b</sup> ) |
| 7     | 100                                              | -        | 100                                            | 48                   | 57 <sup>a</sup> (50 <sup>b</sup> ) |

<sup>a</sup>Yields calculated from peak areas of HPLC analysis using a Thermofisher Hypurity C-18 column with mobile phase 25:75 MeCN:H<sub>2</sub>O (0.1% TFA). Yields were adjusted according to an NMR analysed 1:1:1 mix of the aldehyde:acid:alcohol. <sup>b</sup>Isolated yields in parenthesis.

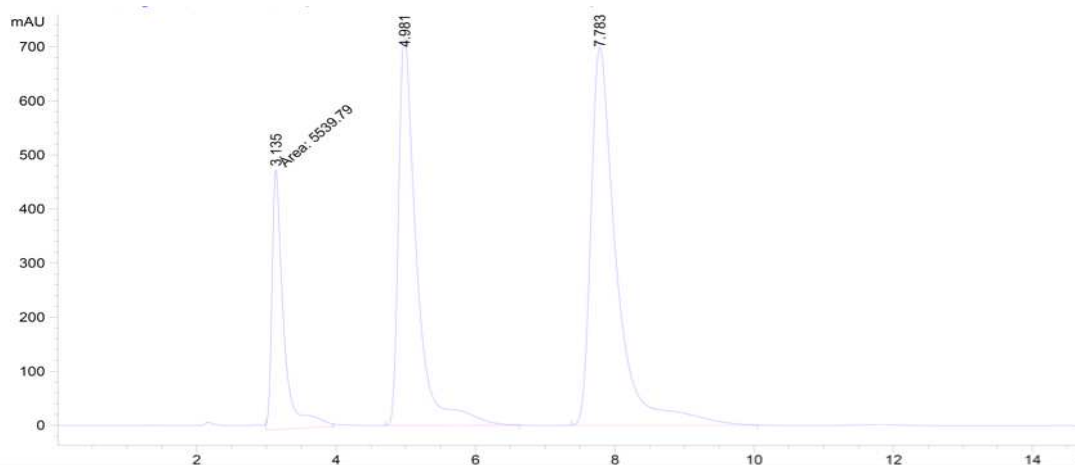

**Figure S29.** HPLC trace of a 1:1:1 mixture of 3-methoxybenzyl alcohol (3.14 min), 3-methoxybenzoic acid (4.98 min) and 3-methoxybenzaldehyde (7.78 min). HPLC conditions: CHIRALPAK® IA column; flow rate 1.0 mL/min; UV 254 nm; eluent= hexane/iPrOH 90:10.

| Peak | Retention<br>time [min] | Area [%] |
|------|-------------------------|----------|
| 1    | 3.135                   | 15.265   |
| 2    | 4.981                   | 35.77    |
| 3    | 7.783                   | 48.96    |

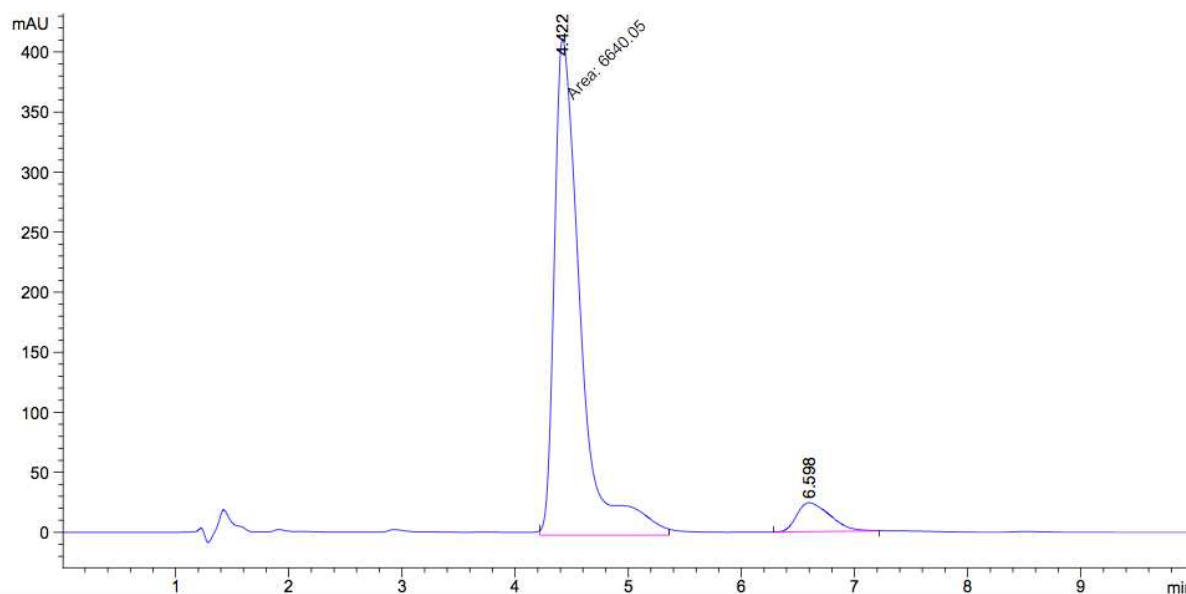

**Figure S30.** HPLC trace of a reaction assay with a 40 mM starting concentration of 3-methoxybenzyl alcohol. HPLC conditions: CHIRALPAK<sup>®</sup> IA column; flow rate 1.0 mL/min; UV 254 nm; eluent= hexane/iPrOH 90:10.

| Peak | Retention time [min] | Area [%] |
|------|----------------------|----------|
| 1    | 4.422                | 93.11    |
| 2    | 6.598                | 6.88     |

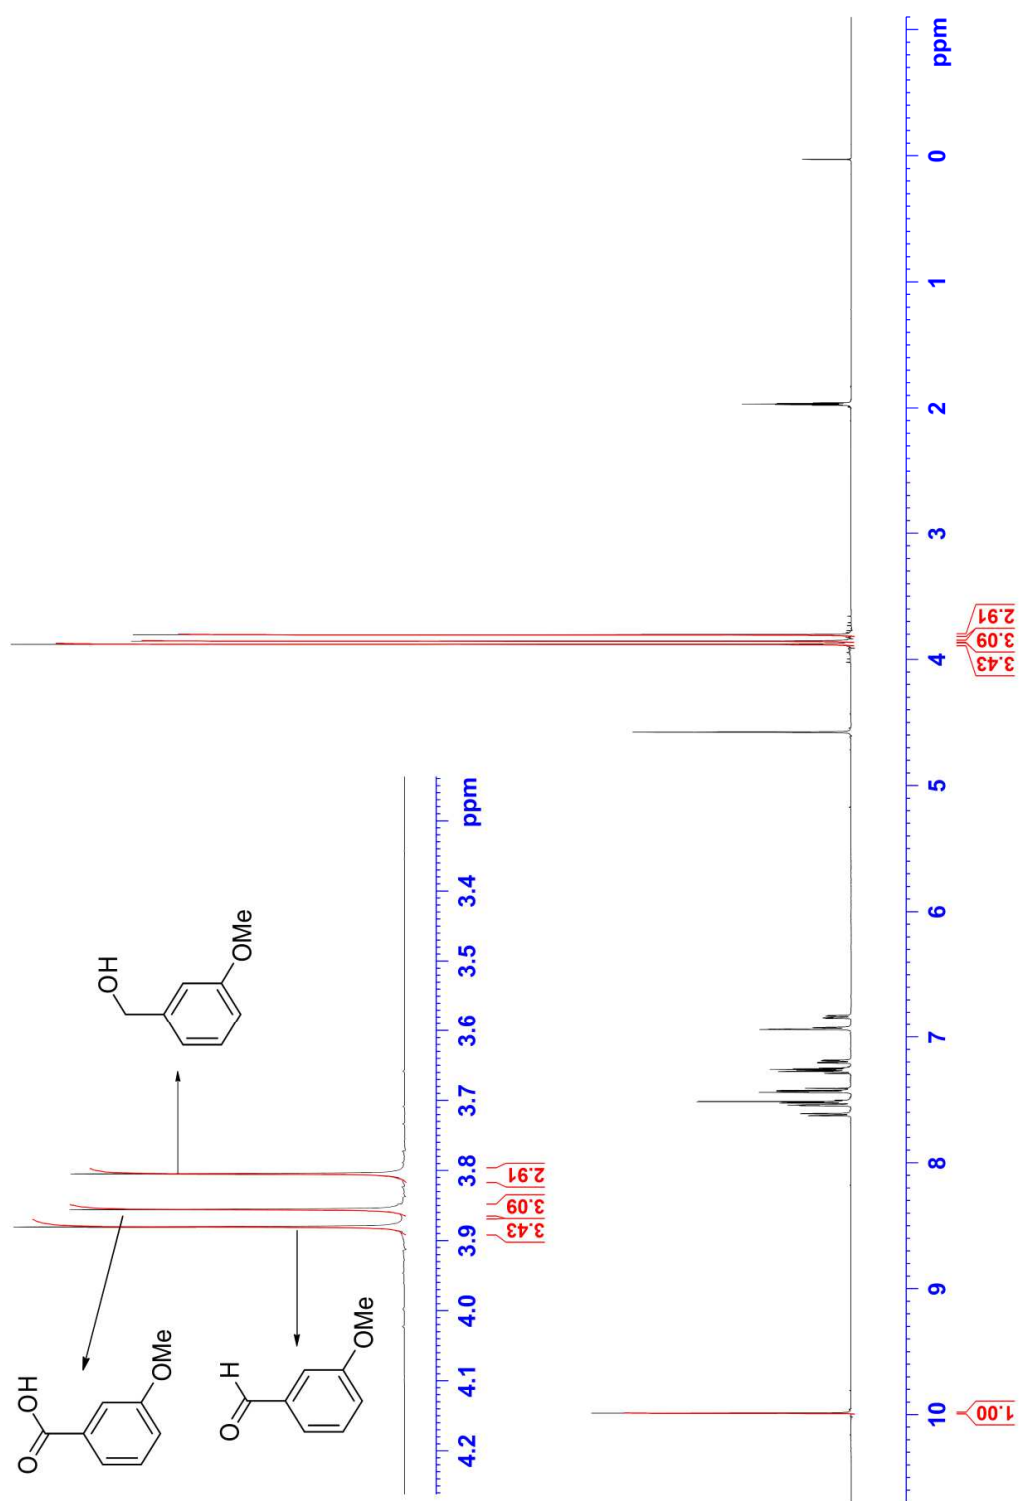

**Figure S31.**  $^1\text{H}$  NMR spectrum (500 MHz) of a 1:1:1 mixture of 3-methoxybenzyl alcohol (3.8 ppm), 3-methoxybenzoic acid (3.86 ppm) and 3-methoxybenzaldehyde (3.89 ppm).

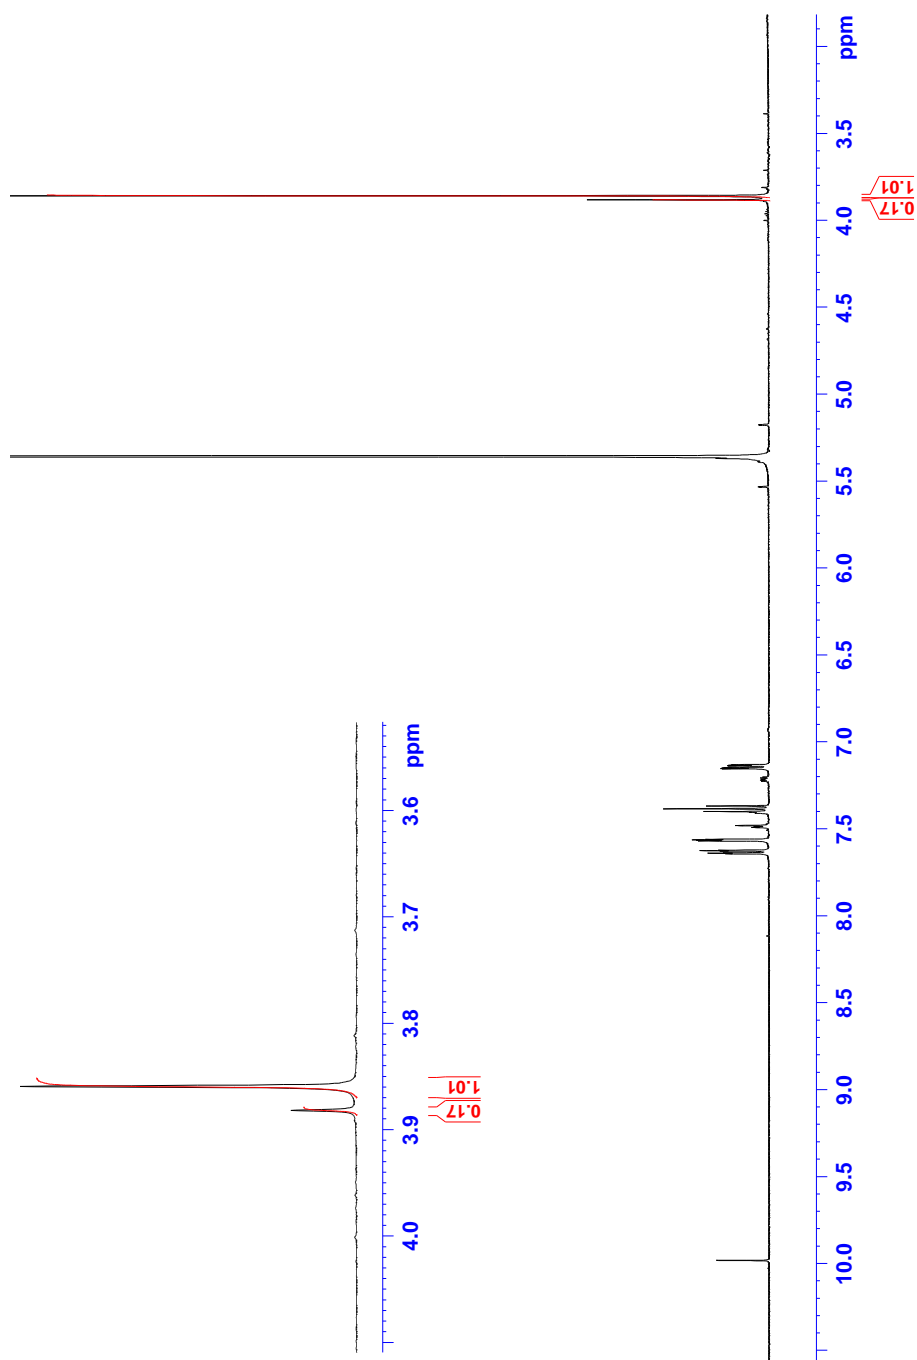

**Figure S32.**  $^1\text{H}$  NMR spectrum (500 MHz) of a reaction assay with a 40 mM starting concentration of 3-methoxybenzyl alcohol to give 3-methoxybenzoic acid (3.86 ppm).



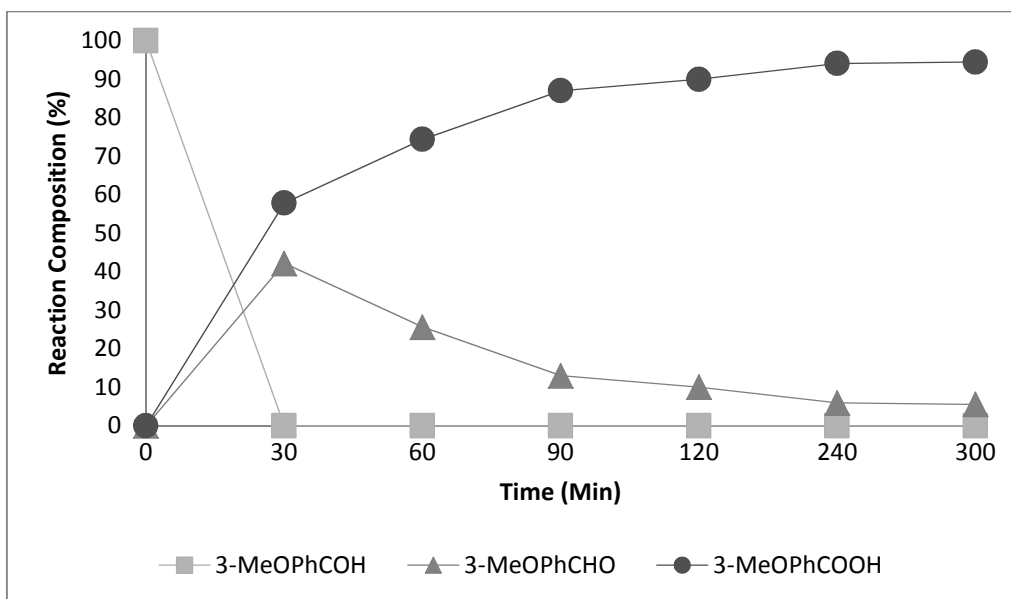

**Figure S33.** Time course of a reaction with a 40 mM starting concentration of 3-methoxybenzyl alcohol **1s** yielding 3-methoxybenzoic acid **5s** in a GOase  $M_{3-5}$  - *E. coli* XDH-cascade.

## 5. Cascade 3

### 5.1 Synthesis of tetrahydroisoquinolines

6-Nitro-1,2,3,4-tetrahydroisoquinoline **6b** was synthesized according to the literature.<sup>13</sup>

#### Synthesis of 2-methyl-1,2,3,4-tetrahydroisoquinoline (**6c**)

3,4-Dihydroisoquinoline **7a** (200 mg, 1.52 mmol) was dissolved in 2 mL of DCM. Methyl iodide (114  $\mu$ L, 1.82 mmol) was added and the reaction was stirred at rt overnight. Solvent was removed under reduced pressure, and the yellow solid was dissolved in 5 mL of MeOH.  $\text{NaBH}_4$  (6.08 mmol, 227 mg) was carefully added, and the reaction was stirred at rt for 4 h.  $\text{H}_2\text{O}$  (5 mL) was added, MeOH was evaporated under reduced pressure and the aqueous solution was extracted with 4 mL of DCM. The solution was dried over  $\text{MgSO}_4$ , filtrated and evaporated under reduced pressure to afford 2-methyl-1,2,3,4-tetrahydroisoquinoline **6c** as a colourless oil (quantitative yield).  $^1\text{H}$  NMR, 400 MHz,  $\text{CDCl}_3$   $\delta$  ppm: 7.16-7.13 (m, 3H), 7.06-7.04 (m, 1H), 3.62 (s, 2H), 2.96 (t,  $J = 5.9$  Hz, 2H), 2.72 (t,  $J = 5.9$  Hz, 2H), 2.49 (s, 3H).  $^{13}\text{C}$  NMR, 100 MHz,  $\text{CDCl}_3$   $\delta$  ppm: 134.7, 133.8, 128.7, 126.4, 126.2, 125.6, 58.0, 52.9, 46.1, 29.2.

### <sup>1</sup>H-NMR analysis of purified 6c

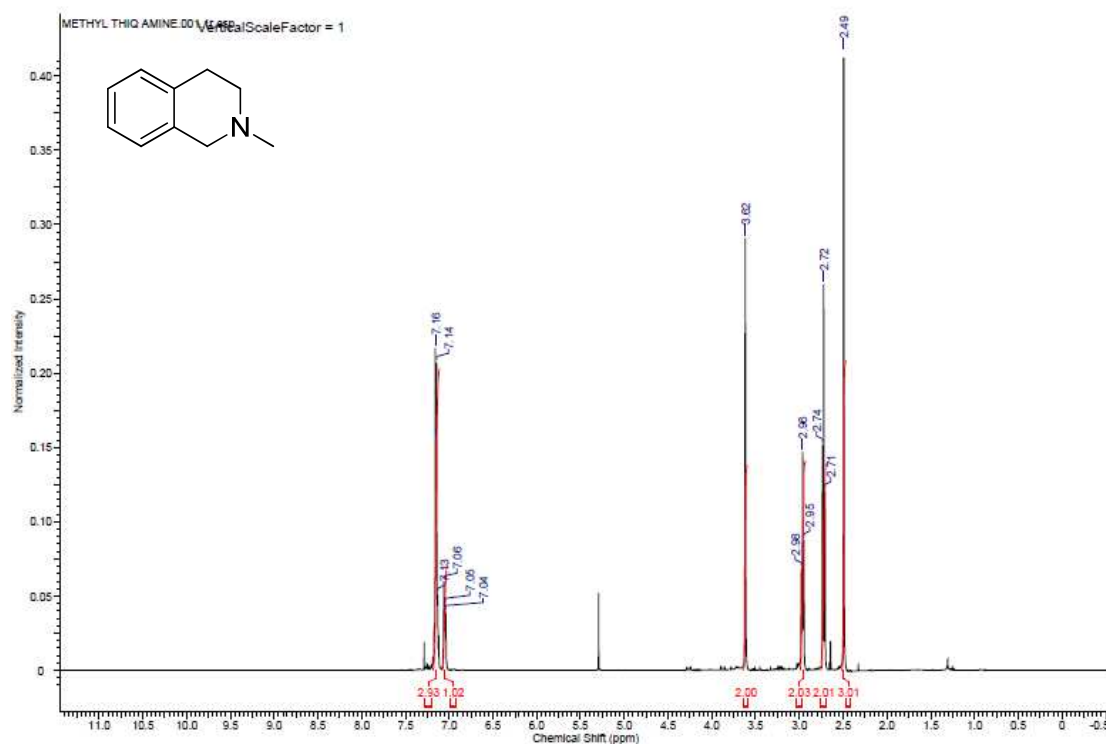

Figure S34. <sup>1</sup>H-NMR spectrum (400 MHz, CDCl<sub>3</sub>) of compound 6c.

### <sup>13</sup>C-NMR analysis of purified compound 6c

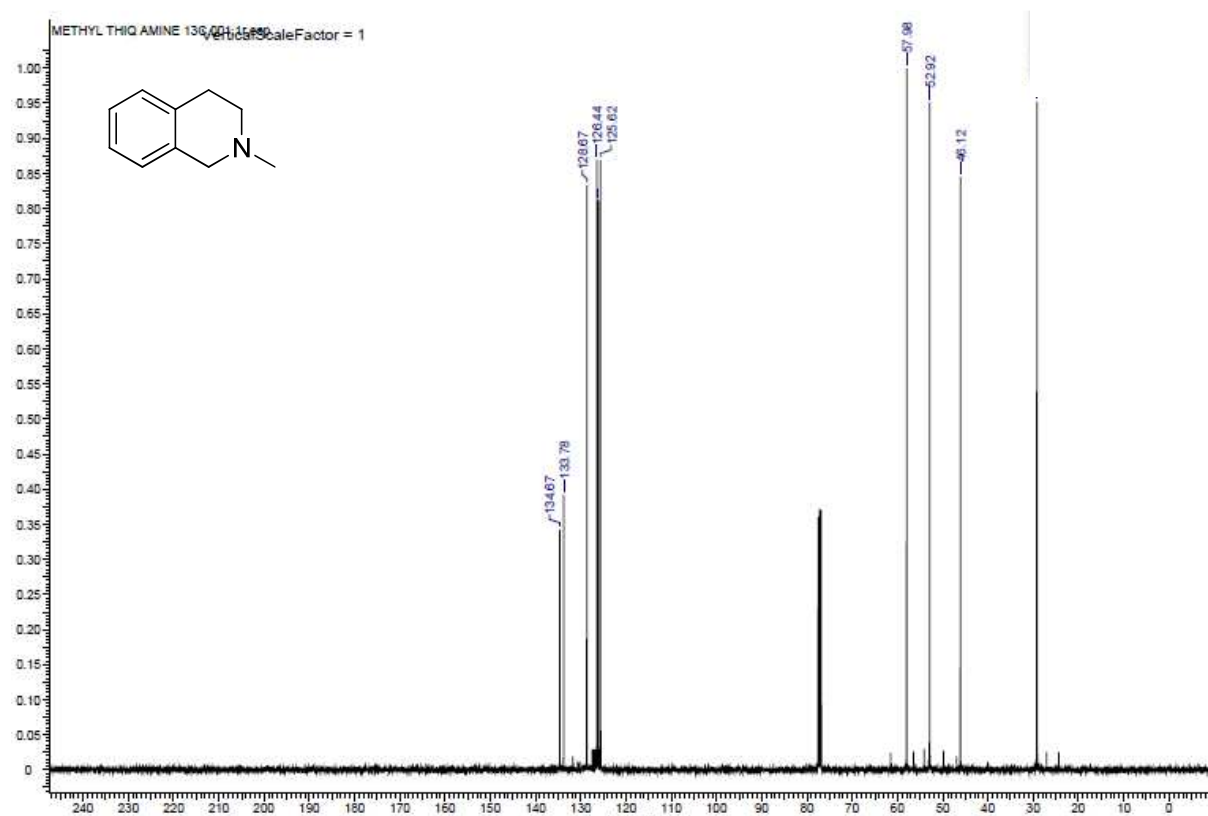

Figure S35. <sup>13</sup>C-NMR spectrum (100 MHz, CDCl<sub>3</sub>) of compound 6c.

## 5.2. Liquid phase screening of MAO-N D9 for oxidation of tetrahydroisoquinolines<sup>14</sup>

The assay was conducted using a 96-well, clear, flat-bottomed polystyrene plate. To each well was added: 50  $\mu$ L HRP solution (0.2 mg/mL solution HRP in KPi buffer 0.1 M), 50  $\mu$ L dye (prepared by pre-mixing 15  $\mu$ L of a 20 mg/mL solution of TBHBA in DMSO and 50  $\mu$ L of a 100 mg/mL solution of 4-AAP in H<sub>2</sub>O, and diluting this solution with 5 mL of KPi buffer 0.1 M), 50  $\mu$ L of a 10 mM solution of substrate in 0.1 M KPi buffer, 50  $\mu$ L of 0.2 mg/mL solution of pure enzyme in 0.1 M KPi buffer. The blank assay was run in parallel using 50  $\mu$ L of 0.1 M KPi buffer instead of a 10 mM solution of substrate in 0.1 M KPi buffer. The plate was read immediately using a Tecan Infinite M200 Pro Plate reader. The formation of the red dye was monitored at 510 nm, taking the linear and early part of the graphs ( $V_{\max}$ , where there is no limiting substrate). The rates for MAO-N D9 are relative to THIQ, assuming THIQ = 100 %.

**Table S6:** Relative rates for oxidation of substrates **6a-c** using MAO-N D9.

| Entry | Substrate                                                                           | MAO-N D9<br>Relative oxidation rate [%] |
|-------|-------------------------------------------------------------------------------------|-----------------------------------------|
| 1     | 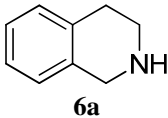   | 100                                     |
| 2     |   | 74                                      |
| 3     |  | 102                                     |

## 5.3. Optimisation of Cu(I)-catalysed imine oxidation: screening of H<sub>2</sub>O<sub>2</sub> amount

3,4-Dihydroisoquinoline **7a** was chosen as model for the development and the optimization of the H<sub>2</sub>O<sub>2</sub>/CuI oxidation reaction.

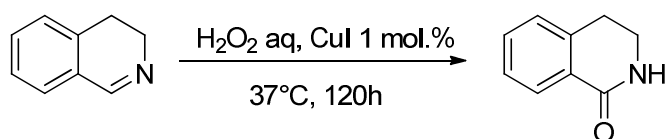

**Table S7:** Optimisation of peroxide concentration for Cu(I) –catalysed oxidation of **7a**.

| Entry                         | 1     | 2     | 3     | 4      |
|-------------------------------|-------|-------|-------|--------|
| H <sub>2</sub> O <sub>2</sub> | 1 eq. | 2 eq. | 5 eq. | 10 eq. |
| Conversion [%] <sup>a</sup>   | 3     | 9     | 62    | 69     |

<sup>a</sup> Conversion to lactam, determined *via* HPLC. HPLC conditions: CHIRALPAK<sup>®</sup> IA column; flow rate 1.0 mL/min; UV 254 nm; eluent= hexane/iPrOH 90:10.

## 5.4. One-pot-two-step cascade reactions for the synthesis of lactams - General procedure C (Table 2 of paper “Conditions A”)

### 5.4.1. Analytical scale method- Bio-chemo catalytic cascade reactions for synthesis of lactams **8** from cyclic amines **6**

In a 15-mL-Falcon tube, cyclic amine (0.04 mmol) dissolved in 0.05 mL of DMF, 0.01 mL of a 40 mM solution of CuI in MeCN (0.0004 mmol, 1 mol %), 0.039 mL of a 35 % sol. H<sub>2</sub>O<sub>2</sub> in H<sub>2</sub>O (0.4 mmol) and pure MAO-N D9 (0.4 mg/mL final concentration) were dissolved in a solution of MOPS Buffer (0.1 M, pH = 7.8) obtaining a final volume of 1 mL. The tube was placed in a shaking incubator and shaken at 37 °C and 250 rpm. The reaction was monitored by HPLC and work up was performed when the conversion was considered maximum. HPLC samples were prepared as follows: aqueous sodium thiosulfate solution (20 µL, saturated) was added to a 100 µL sample of the reaction mixture in an Eppendorf tube, followed by 1 mL of DCM. After vigorous mixing by means of a vortex mixer the sample was centrifuged at 13200 rpm for 1 minute. The organic phase was separated, dried with MgSO<sub>4</sub> and analysed by HPLC. When the intermediate was an iminium, the reaction mixture was allowed to react with 4 eq. of BH<sub>3</sub>·NH<sub>3</sub> for 12 hours prior to injection in the HPLC (to allow unreacted iminium to be reduced to amine). Relative response factors were determined *via* NMR-HPLC correlations (cf. Figures S40, S41 and S60) for the conversions to lactams **8a** and **8c**. Compound **8b** was isolated and analysed *via* NMR.

#### 3,4-Dihydroisoquinolin-1(2H)-one (**8a**)

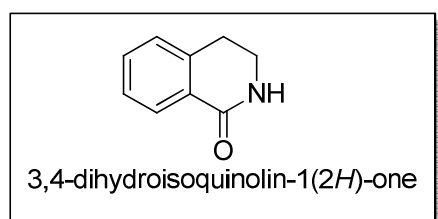

The reaction was performed following general procedure C, using 0.4 mg/mL pure MAO-N D9 enzyme, 10 eq. of 35 % sol. H<sub>2</sub>O<sub>2</sub> in H<sub>2</sub>O and 1 mol% CuI, 24 h reaction time.

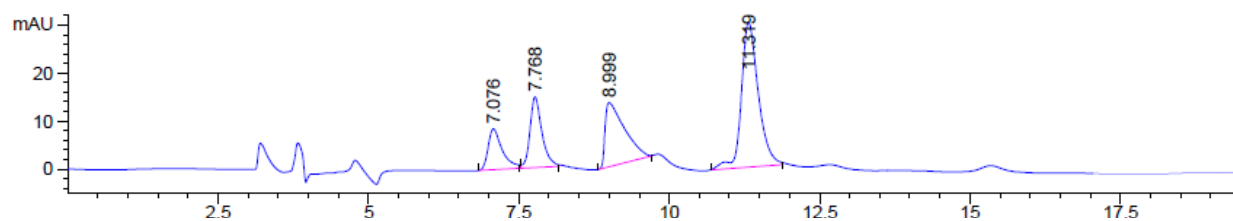

**Figure S36.** HPLC trace. HPLC conditions: CHIRALPAK<sup>®</sup> IA column; flow rate 1.0 mL/min; UV 254 nm; eluent = hexane/iPrOH 90:10 + 0.1% DEA.

| Peak            | Retention time [min] | Area [%] |
|-----------------|----------------------|----------|
| 1 ( <b>7a</b> ) | 7.076                | 11.22    |
| 2               | 7.768                | 16.55    |
| 3               | 8.999                | 24.17    |
| 4 ( <b>8a</b> ) | 11.319               | 48.05    |

### 3,4-Dihydroisoquinolin-1(2H)-one (8a)

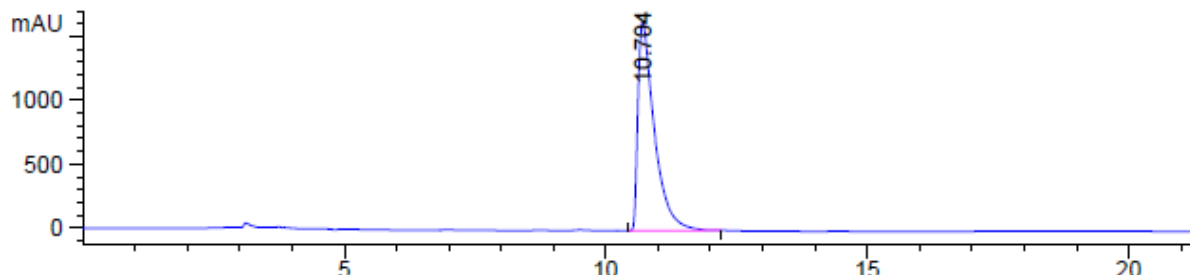

**Figure S37.** HPLC trace. HPLC conditions: CHIRALPAK<sup>®</sup> IA column; flow rate 1.0 mL/min; UV 254 nm; eluent = hexane/iPrOH 90:10 + 0.1% DEA.

### 3,4-Dihydroisoquinoline (7a)

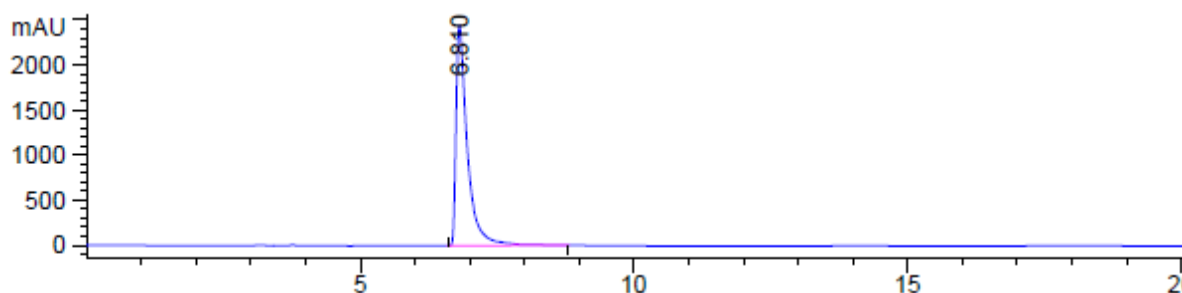

**Figure S38.** HPLC trace. HPLC conditions: CHIRALPAK<sup>®</sup> IA column; flow rate 1.0 mL/min; UV 254 nm; eluent = hexane/iPrOH 90:10 + 0.1% DEA.

### Tetrahydroisoquinoline (6a)

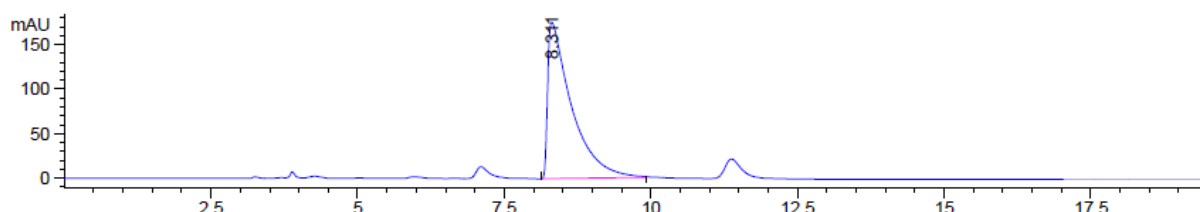

**Figure S39.** HPLC trace. HPLC conditions: CHIRALPAK<sup>®</sup> IA column; flow rate 1.0 mL/min; UV 254 nm; eluent = hexane/iPrOH 90:10 + 0.1% DEA.

### 1:2 Mixture of lactam 8a and imine 7a (NMR)

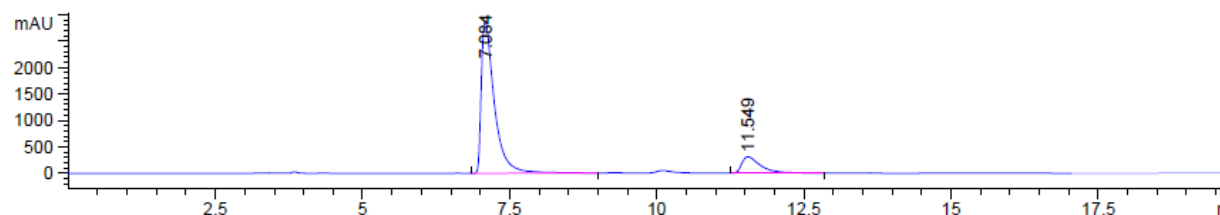

**Figure S40.** HPLC trace. HPLC conditions: CHIRALPAK<sup>®</sup> IA column; flow rate 1.0 mL/min; UV 254 nm; eluent = hexane/iPrOH 90:10 + 0.1% DEA.

| Peak          | Retention time [min] | Area [%] |
|---------------|----------------------|----------|
| 1 (imine 7a)  | 7.084                | 86.61    |
| 2 (lactam 8a) | 11.549               | 13.38    |

Response Factor for imine 7a = 3.3 x response for lactam 8a.

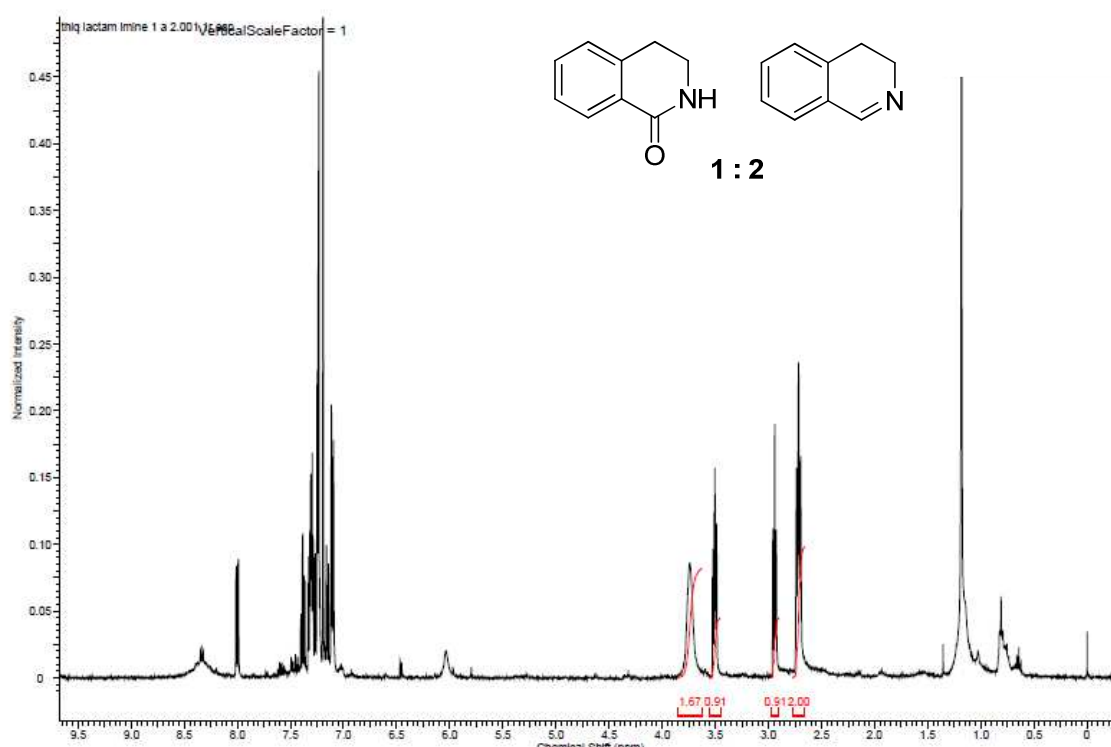

Figure S41.  $^1\text{H}$ -NMR spectrum (400 MHz,  $\text{CDCl}_3$ ) of a 1:2 mixture of compounds **8a** and **7a**.

## 2-Methyl-6-nitro-3,4-dihydroisoquinolin-1(2H)-one **8b**

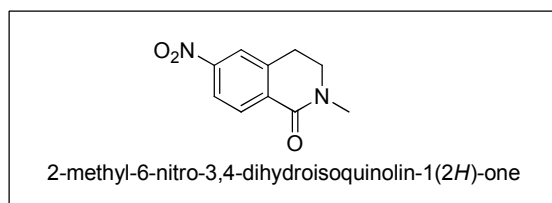

The reaction was performed following general procedure C, using 1 mg/mL pure MAO-N D9 enzyme, 20 eq. of 35 % sol.  $\text{H}_2\text{O}_2$  in  $\text{H}_2\text{O}$  and 2 mol%  $\text{CuI}$ , 48 h reaction time.

### HPLC before addition of $\text{BH}_3\text{NH}_3$

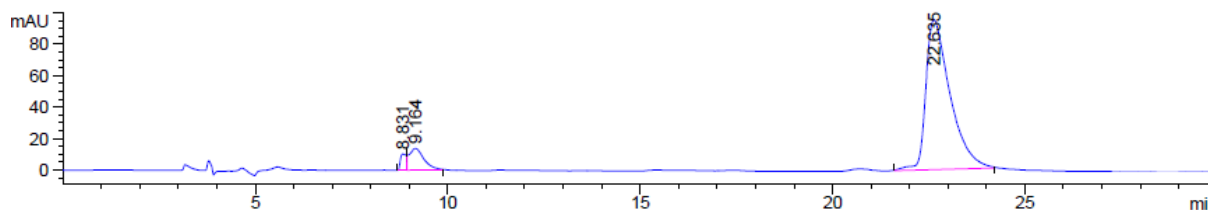

Figure S42. HPLC trace. HPLC conditions: CHIRALPAK<sup>®</sup> IA column; flow rate 1.0 mL/min; UV 254 nm; eluent = hexane/iPrOH 90:10 + 0.1% DEA.

| Peak | Retention time [min] | Area [%] |
|------|----------------------|----------|
| 1    | 8.831                | 2.35     |
| 2    | 9.164                | 7.90     |
| 3    | 22.635               | 89.74    |

### HPLC after addition of BH<sub>3</sub>NH<sub>3</sub>

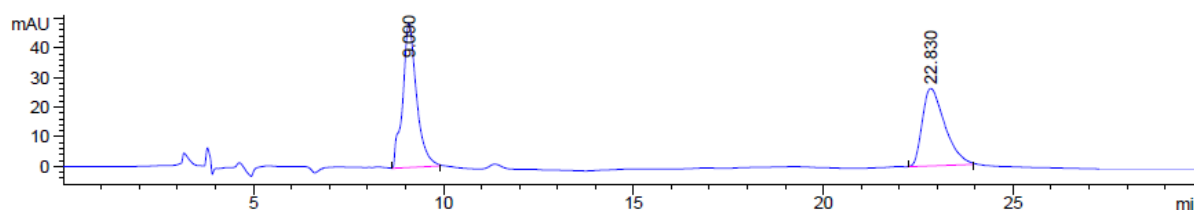

**Figure S43.** HPLC trace. HPLC conditions: CHIRALPAK<sup>®</sup> IA column; flow rate 1.0 mL/min; UV 254 nm; eluent = hexane/iPrOH 90:10 + 0.1% DEA.

| Peak | Retention time [min] | Area [%] |
|------|----------------------|----------|
| 1    | 9.09                 | 53.41    |
| 2    | 22.830               | 46.58    |

### 2-Methyl-3,4-dihydroisoquinolin-1(2H)-one (8c)

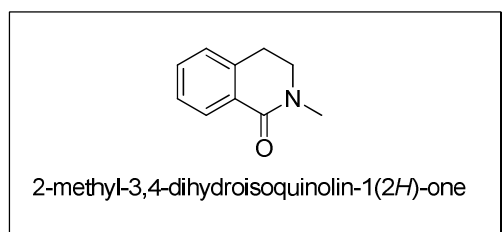

The reaction was performed following general procedure C, using 1 mg/mL pure MAO-N D9 enzyme, 20 eq. of 35 % sol. H<sub>2</sub>O<sub>2</sub> in H<sub>2</sub>O and 2 mol% CuI, 48 h reaction time.

### HPLC before addition of BH<sub>3</sub>NH<sub>3</sub>

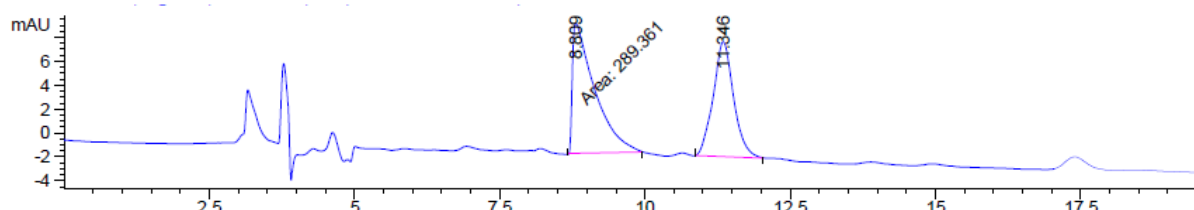

**Figure S44.** HPLC trace. HPLC conditions: CHIRALPAK<sup>®</sup> IA column; flow rate 1.0 mL/min; UV 254 nm; eluent = hexane/iPrOH 90:10 + 0.1% DEA.

| Peak | Retention time [min] | Area [%] |
|------|----------------------|----------|
| 1    | 8.809                | 55.18    |
| 2    | 11.346               | 44.82    |

### HPLC after addition of BH<sub>3</sub>NH<sub>3</sub>

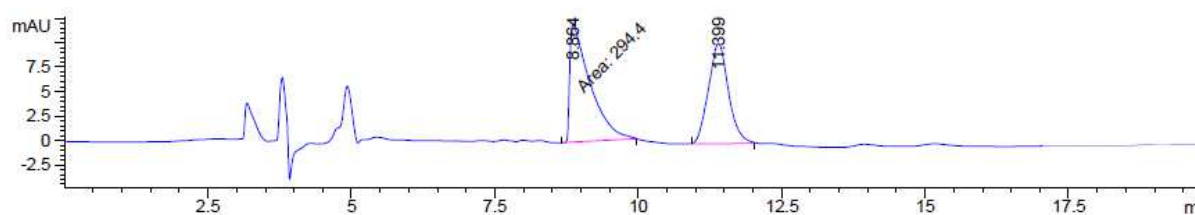

**Figure S45.** HPLC trace. HPLC conditions: CHIRALPAK<sup>®</sup> IA column; flow rate 1.0 mL/min; UV 254 nm; eluent = hexane/iPrOH 90:10 + 0.1% DEA.

| Peak | Retention time [min] | Area [%] |
|------|----------------------|----------|
| 1    | 8.864                | 54.15    |
| 2    | 11.399               | 45.85    |

### 5.4.2. Preparative method - Bio-chemo catalytic cascade reactions for synthesis of lactams **8** from cyclic amines **6**

In a 50-mL-Falcon tube, cyclic amine (0.2 mmol) dissolved in 0.1 mL of DMF, 0.05 mL of a 40 mM solution of CuI in MeCN (0.002 mmol, 1 mol%), 0.195 mL of a 35 % sol. H<sub>2</sub>O<sub>2</sub> in H<sub>2</sub>O (2 mmol) and pure MAO-N D9 (0.4 mg/mL final concentration) were dissolved in a solution of MOPS Buffer (0.1 M, pH = 7.8) obtaining a final volume of 5 mL. The tube was placed in a shaking incubator and shaken at 37 °C and 250 rpm. The reaction was monitored by HPLC and work up was performed when the conversion was considered maximum. HPLC samples were prepared as follows: aqueous thiosulfate solution (20 µL, saturated) was added to a 100 µL sample of the reaction mixture in an Eppendorf tube, followed by 1 mL of DCM. After vigorous mixing by means of a vortex mixer the sample was centrifuged at 13200 rpm for 1 minute. The organic phase was separated, dried with MgSO<sub>4</sub> and analysed by HPLC. Work up was performed in the following way: aqueous thiosulfate solution (1 mL, saturated) and DCM (5 mL) were added. The organic phase was separated, dried over MgSO<sub>4</sub> and analysed by HPLC. The reaction was then submitted to silica gel column chromatography.

#### 3,4-Dihydroisoquinolin-1(2H)-one (**8a**)

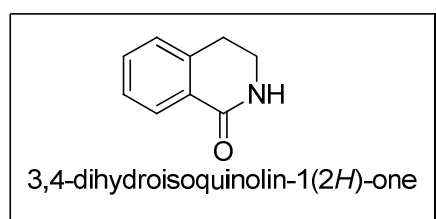

The reaction was performed following general procedure C, using 0.4 mg/mL pure MAO-N D9 enzyme, 10 eq. of 35 % sol. H<sub>2</sub>O<sub>2</sub> in H<sub>2</sub>O and 1 mol% CuI, and 24 h reaction time. After work-up, purification with silica gel column chromatography using ethyl acetate as eluent gave 3,4-dihydroisoquinolin-1(2H)-one as a white solid. NMR data for compound **8a** are identical to those reported in the literature.<sup>15</sup>



## <sup>1</sup>H-NMR analysis of purified 8a

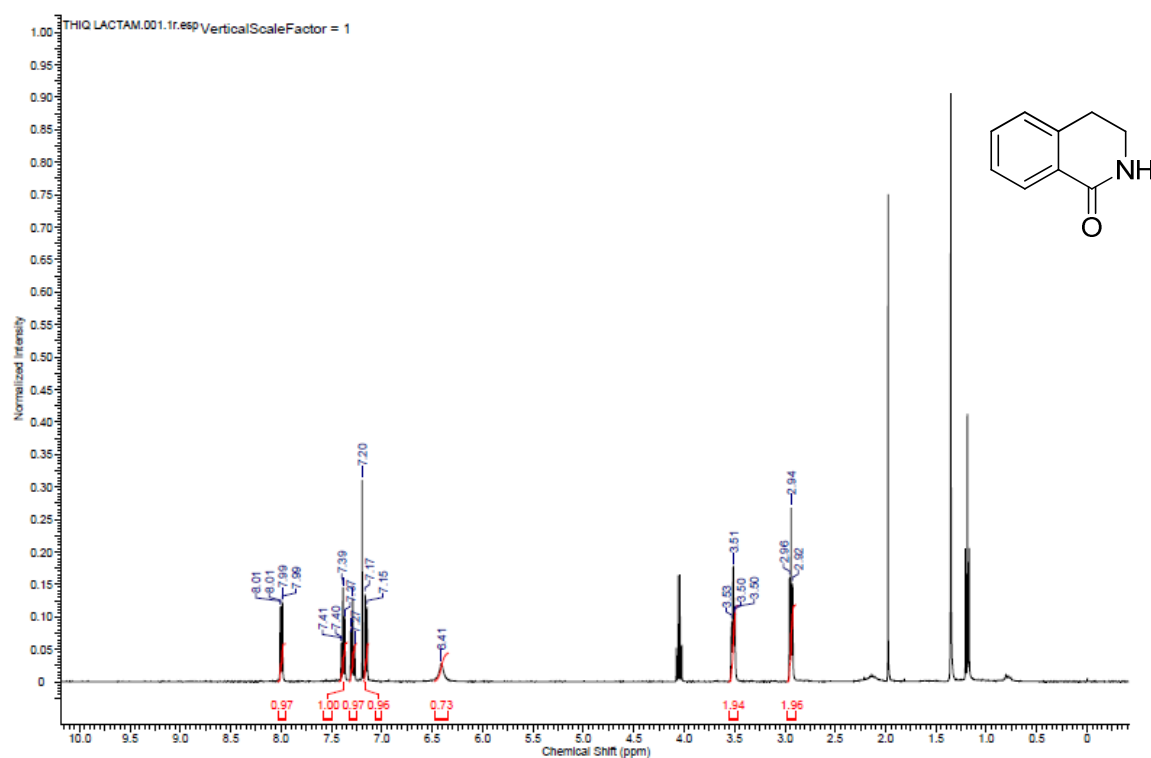

Figure S46. <sup>1</sup>H-NMR spectrum (400 MHz, CDCl<sub>3</sub>) of compound 8a.

## 2-Methyl-6-nitro-3,4-dihydroisoquinolin-1(2H)-one (8c)

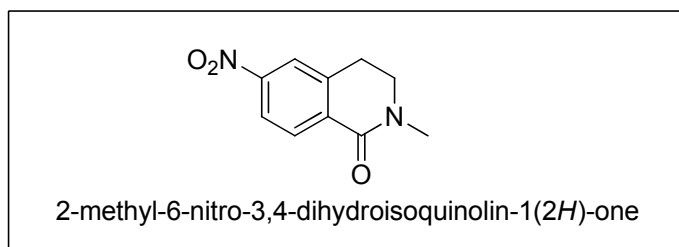

The reaction was performed following general procedure C, using 1 mg/mL pure MAO-N D9 enzyme, 20 eq. of 35 % sol. H<sub>2</sub>O<sub>2</sub> in H<sub>2</sub>O and 2 mol% CuI, 48 h reaction time. After work-up, purification with silica gel column chromatography using ethyl acetate as eluent gave 2-methyl-6-nitro-3,4 dihydroisoquinolin-1(2H)-one as a yellow crystals. Yield: 40 %.

<sup>1</sup>H NMR, 400 MHz, CDCl<sub>3</sub> δ ppm: 8.19-8.16 (m, 1H), 8.11-8.08 (m, 1H), 8.00-7.99 (m, 1H), 3.58 (t, *J* = 6.7 Hz, 2H), 3.13 (s, 3H), 3.07 (t, *J* = 6.7 Hz, 3H). <sup>13</sup>C NMR, 100 MHz, CDCl<sub>3</sub> δ ppm: 162.7, 149.5, 139.4, 134.5, 129.6, 122.12, 122.07, 47.7, 35.4, 29.8. TOF-Ms (*m/z*) = 207.8 [M+H]<sup>+</sup>.

### <sup>1</sup>H-NMR analysis of purified 8c

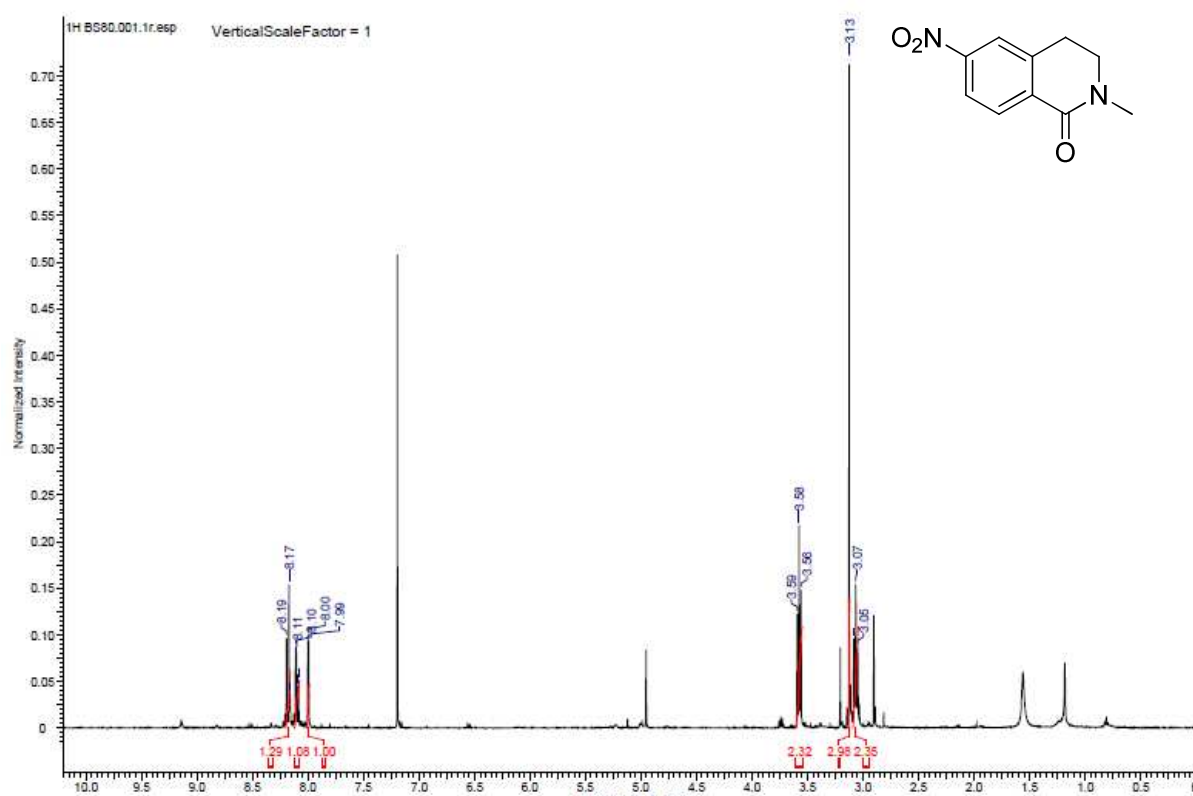

**Figure S47.**  $^1\text{H}$ -NMR spectrum (400 MHz,  $\text{CDCl}_3$ ) of compound **8c**.

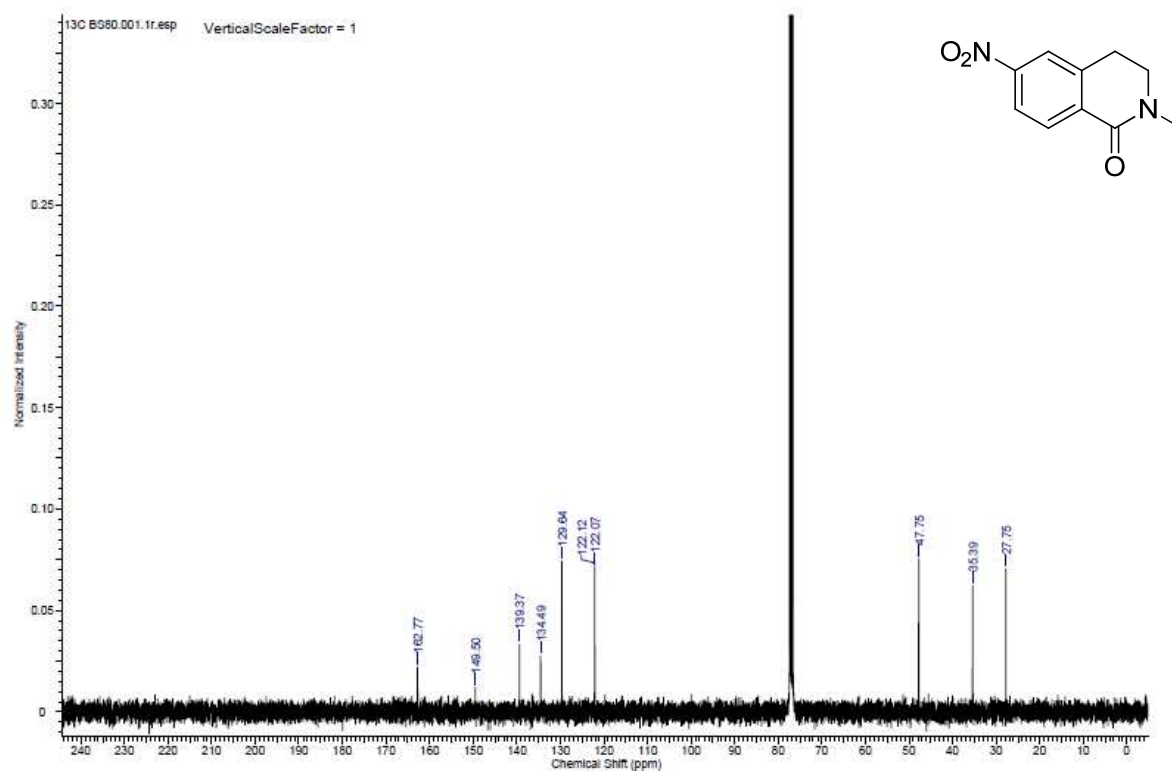

**Figure S48.**  $^{13}\text{C}$ -NMR spectrum (100 MHz,  $\text{CDCl}_3$ ) of compound **8c**.

### 5.4.3. Analytical scale method - Bio-biocatalytic cascade reactions for synthesis of lactams **8** from cyclic amines **6** (Main paper Table 3, “Conditions B-D”)

#### 3,4-Dihydroisoquinolin-1(2*H*)-one (**8a**)

##### Conditions B - MAO-N D9, XDH E232V, DCPIP, K<sub>3</sub>Fe(CN)<sub>6</sub>

MAO-N D9 (30  $\mu$ L of 10 mg/mL), THIQ (30  $\mu$ L of 10 mM solution in KPi buffer, pH 7.6), DCPIP (30  $\mu$ L of 1 mM), K<sub>3</sub>Fe(CN)<sub>6</sub> (30  $\mu$ L of 10 mM) and recombinant *R. capsulatus* XDH E232V (20  $\mu$ L of 25 mg/mL in Tris buffer pH 7.6) was added to KPi buffer (100 mM, pH 7.6) (160  $\mu$ L). The solution was shaken at 25 °C for 135 min. An equal volume of DCM was added, the reaction shaken and the DCM layer separated for HPLC analysis. Using the 3.3 conversion factor (vide infra) the conversion to lactam **8a** was 91 %.

##### HPLC analysis of a reaction according to conditions B

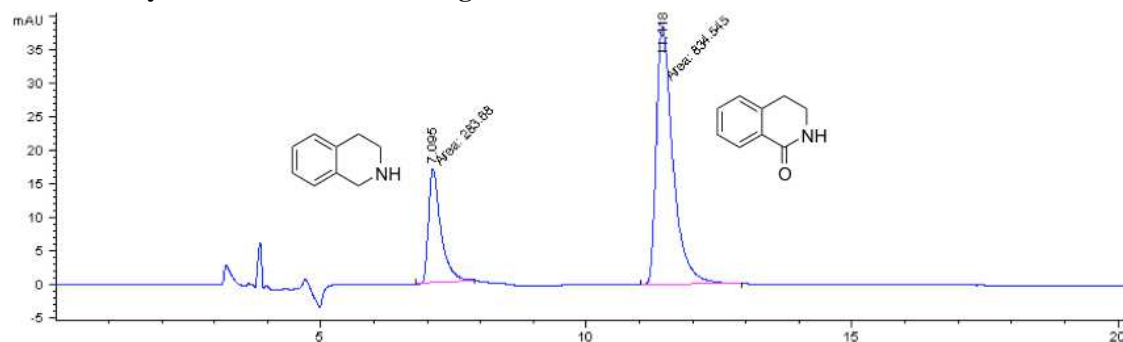

**Figure S49.** HPLC trace. HPLC conditions: CHIRALPAK® IA column; flow rate 1.0 mL/min; UV 254 nm; eluent= hexane/iPrOH 90:10.

| Peak                  | Retention time [min] | Area [%] |
|-----------------------|----------------------|----------|
| 1 (amine <b>6a</b> )  | 7.095                | 25.38    |
| 2 (lactam <b>8a</b> ) | 11.418               | 74.62    |

After applying response factor conversion to lactam **8a** = 91 %.

##### Conditions C - MAO-N D9, XDH E232V, DCPIP, laccase

MAO-N D9 (30  $\mu$ L of 11 mg/mL), THIQ (3  $\mu$ L of 100mM solution in DMF), DCPIP (30  $\mu$ L of 1 mM), *T. versicolor* laccase (30  $\mu$ L of 6 mg/mL) and XDH E232V (10  $\mu$ L of 33 mg/mL in Tris buffer pH 7.6) was added to KPi buffer (100 mM, pH7.6) (297  $\mu$ L). The solution was shaken at 22 °C for 120 min. An equal volume of DCM was added, the reaction shaken and the DCM layer separated for HPLC analysis. Using the 3.3 conversion factor (vide infra) the conversion to lactam **8a** was 54 %.

##### HPLC analysis of a reaction according to condition C

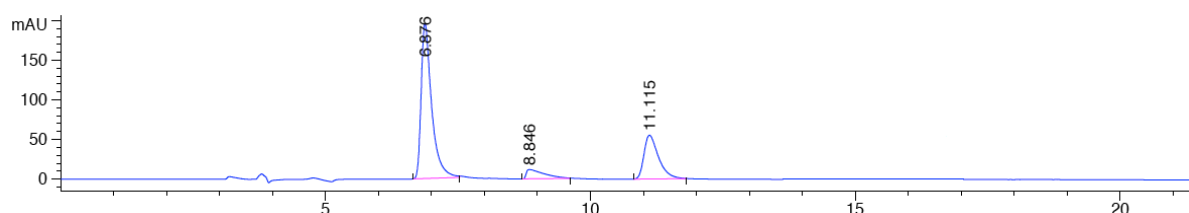

**Figure S50.** HPLC trace. HPLC conditions: CHIRALPAK® IA column; flow rate 1.0 mL/min; UV 254 nm; eluent= hexane/iPrOH 90:10.

| Peak | Retention time [min] | Area [%] |
|------|----------------------|----------|
| 1    | 6.876                | 66.92    |
| 2    | 8.846                | 6.88     |
| 3    | 11.115               | 26.2     |

After applying response factor conversion to lactam **8a** = 54 %.

#### Conditions D - MAO-N D9, *E. coli* XDH, catalase

MAO-N D9 (30  $\mu$ L of 11 mg/mL), THIQ (3  $\mu$ L of 1 M solution in DMF), catalase (100  $\mu$ L of 1 mg/mL), *E. coli* XDH (100  $\mu$ L, 1.1 mg/ml) and KPi buffer (67  $\mu$ L, 50 mM, pH 7.6) were shaken for 7 h at 37 °C. The reaction was extracted with an equal amount of dichloromethane and analysed via HPLC.

#### HPLC analysis of a reaction according to condition D

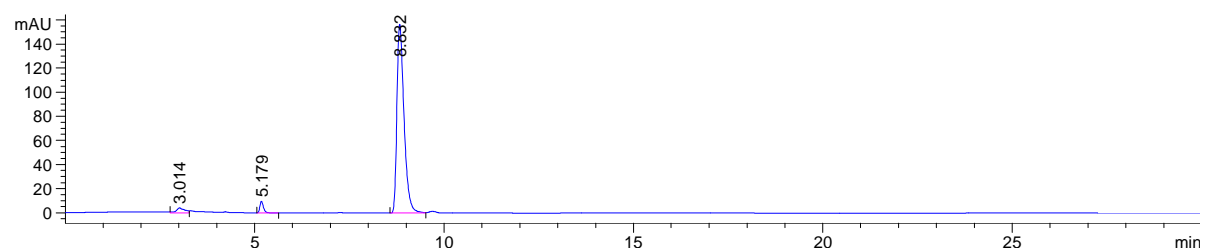

**Figure S51.** HPLC trace. HPLC conditions: CHIRALCEL<sup>®</sup> OJ-H column; flow rate 1.0 mL/min; UV 254 nm; eluent= hexane/iPrOH 90:10.

| Peak | Retention time [min] | Area [%] |
|------|----------------------|----------|
| 1    | 3.014                | 2.81     |
| 2    | 5.179                | 2.86     |
| 3    | 8.832                | 94.33    |

CHIRALCEL<sup>®</sup> OJ-H column the response factor was 1:1 which is a conversion = 94%.

#### HPLC analysis of an authentic standard of tetrahydroisoquinoline (6a)

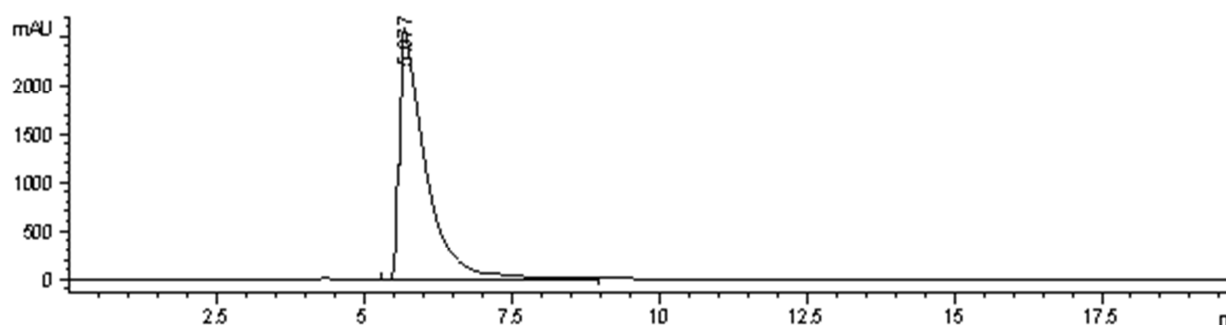

**Figure S52.** HPLC trace. HPLC conditions: CHIRALCEL<sup>®</sup> OJ-H column; flow rate 1.0 mL/min; UV 254 nm; eluent= hexane/iPrOH 90:10.

### HPLC analysis of an authentic standard of 3,4-dihydroisoquinolin-1(2H)-one (8a)

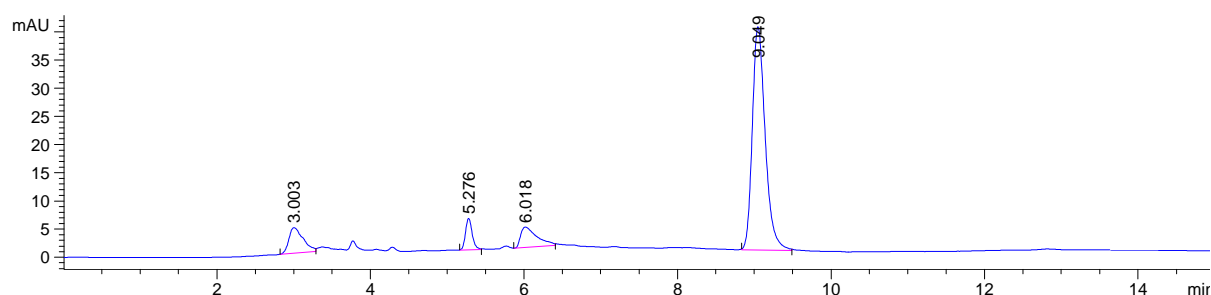

**Figure S53.** HPLC trace. HPLC conditions: CHIRALCEL<sup>®</sup> OJ-H column; flow rate 1.0 mL/min; UV 254 nm; eluent= hexane/iPrOH 90:10.

### 2-Methyl-3,4-dihydroisoquinolin-1(2H)-one (8c)

#### Conditions D

MAO-N D9 (30  $\mu$ L), catalase (100  $\mu$ L, 2 mg/mL of buffer pH7.6), N-Me THIQ (3  $\mu$ L, 1 M in DMF) and KPi buffer (67  $\mu$ L, 50 mM, pH 7.6) were added to an Eppendorf tube. The reaction was run at two pHs, pH 7.6 and pH~8.0. For the later, the solution was basified to pH 8 using dibasic potassium phosphate buffer (5  $\mu$ L, 50 mM) and *E. coli* XDH (100  $\mu$ L, 1.1 mg/ml) was added. After incubating for 16 h at 37  $^{\circ}$ C with shaking, a spatula of ammonia-borane complex was added and shaken for a further 3 h prior to extraction using DCM and centrifugation

### HPLC analysis of an authentic standard of 2-methyl-1,2,3,4-tetrahydroisoquinoline 6c

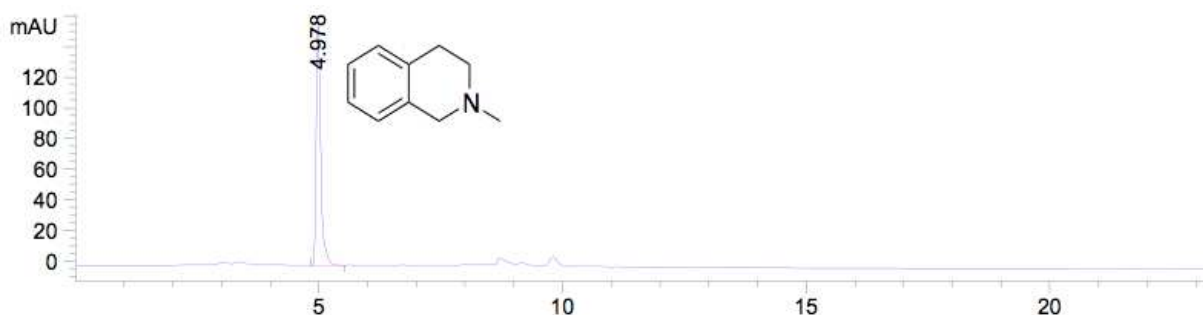

**Figure S54.** HPLC trace. HPLC conditions: CHIRALCEL<sup>®</sup> OJ-H column; flow rate 1.0 mL/min; UV 254 nm; eluent= hexane/iPrOH 90:10.

### HPLC analysis of an authentic standard of 2-methyl-3,4-dihydroisoquinolin-1(2H)-one 8c

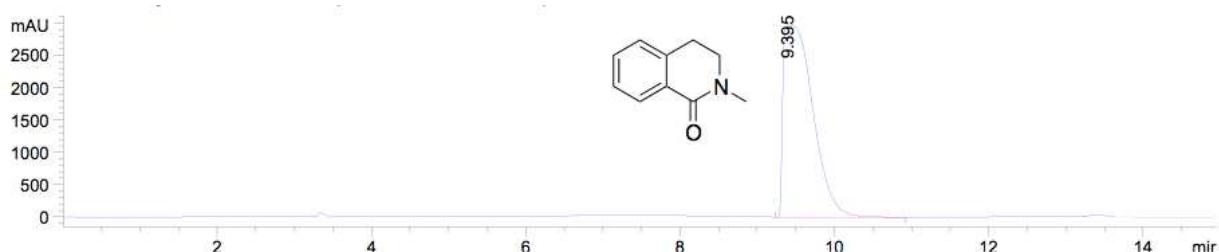

**Figure S55.** HPLC trace. HPLC conditions: CHIRALCEL<sup>®</sup> OJ-H column; flow rate 1.0 mL/min; UV 254 nm; eluent= hexane/iPrOH 90:10.

**HPLC analysis of a reaction according to conditions D MAO-N D9/*E. coli* XDH cascade (10 mM, 50 mM KPi, pH ~8) to give 2-methyl-3,4-dihydroisoquinolin-1(2*H*)-one **8c****

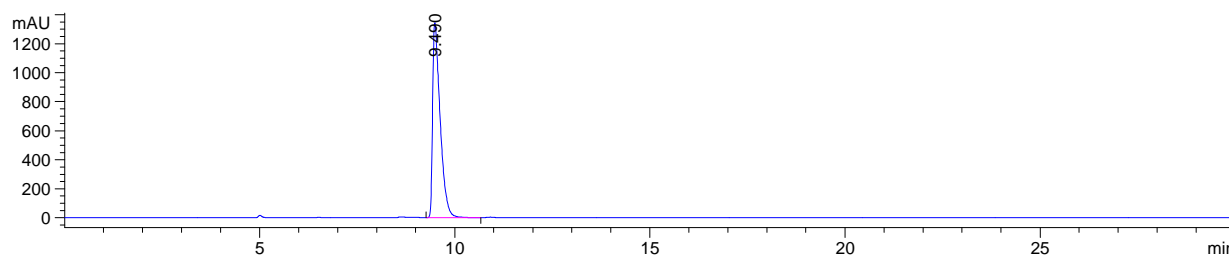

**Figure S56.** HPLC trace. HPLC conditions: CHIRALCEL® OJ-H column; flow rate 1.0 mL/min; UV 254 nm; eluent= hexane/iPrOH 90:10.

**HPLC analysis of a reaction according to conditions D MAO-N D9/ *E. coli* XDH cascade (10 mM, 50 mM KPi, pH 7.6) giving incomplete conversion to **8c****

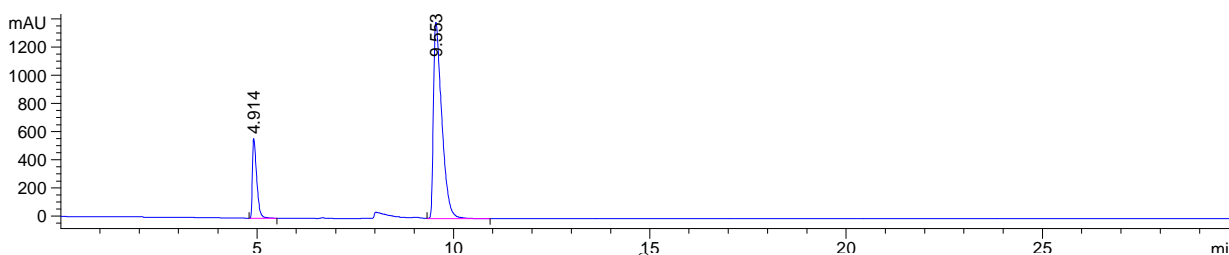

**Figure S57.** HPLC trace. HPLC conditions: CHIRALCEL® OJ-H column; flow rate 1.0 mL/min; UV 254 nm; eluent= hexane/iPrOH 90:10.

| Peak                  | Retention time [min] | Area [%] |
|-----------------------|----------------------|----------|
| 1(amine <b>6c</b> )   | 4.914                | 17.15    |
| 2 (lactam <b>8c</b> ) | 9.553                | 82.84    |

After applying HPLC response factor (see Fig. S60), the conversion to lactam **8c** in Fig. S57 is 36 %.

### 5.5 Synthesis of 2-methyl-3,4-dihydroisoquinolin-1(2*H*)-one **8c**<sup>16</sup>

3,4-Dihydroisoquinoline (100 mg, 0.76 mmol) was dissolved in acetone (10 mL) and an excess of iodomethane (60  $\mu$ L) was added. The mixture was left to stir overnight at room temperature, after which the solvent was evaporated *in vacuo* to give 2-methyl-3,4-dihydroisoquinolinium iodide a yellow solid (157 mg, 75 %). NMR <sup>1</sup>H (400 MHz, CDCl<sub>3</sub>)  $\delta$  10.03 (1 H, s, CH), 8.05-8.04 (1 H, d, *J* = 4 Hz, aromatic), 7.72-7.68 (1 H, t, *J* = 8 Hz, aromatic), 7.47-7.43 (1 H, t, *J* = 8 Hz, aromatic), 7.37-7.35 (1 H, d, *J* = 8 Hz, aromatic), 4.14-4.10 (2 H, t, *J* = 8 Hz, CH<sub>2</sub>), 4.02 (3 H, s, CH<sub>3</sub>), 3.42-3.38 (2 H, t, *J* = 8 Hz, CH<sub>2</sub>). <sup>13</sup>C (100 MHz, CDCl<sub>3</sub>)  $\delta$  166.59, 137.98, 135.59, 134.40, 128.62, 128.27, 124.52, 50.97, 48.72, 25.37. *m/z* 148 ([M+H]<sup>+</sup>, 30). 2-Methyl-3,4-dihydroisoquinolinium iodide (100 mg, 0.4 mmol) was dissolved in DMSO (3.7 mL), to which concentrated hydrochloric acid (0.53 mL) was added. The solution was left to stir for an hour at room temperature and was worked up with distilled water and diethyl ether before being purified by column chromatography (2 % methanol/dichloromethane) to give a residue (14.8 mg, 25 %). NMR <sup>1</sup>H (400 MHz, CDCl<sub>3</sub>)  $\delta$  8.09-7.16 (4H, m, Ar-*H*), 3.58-3.55 (4H, dt, *J* = 4, 8 Hz, CH<sub>2</sub>), 3.15 (3H, s, CH<sub>3</sub>). <sup>13</sup>C (100 MHz, CDCl<sub>3</sub>)  $\delta$  164.81, 137.94, 131.50, 129.38, 128.14, 127.00, 126.84, 48.14, 35.17, 27.92 *m/z* 162 ([M+H]<sup>+</sup>, 100).

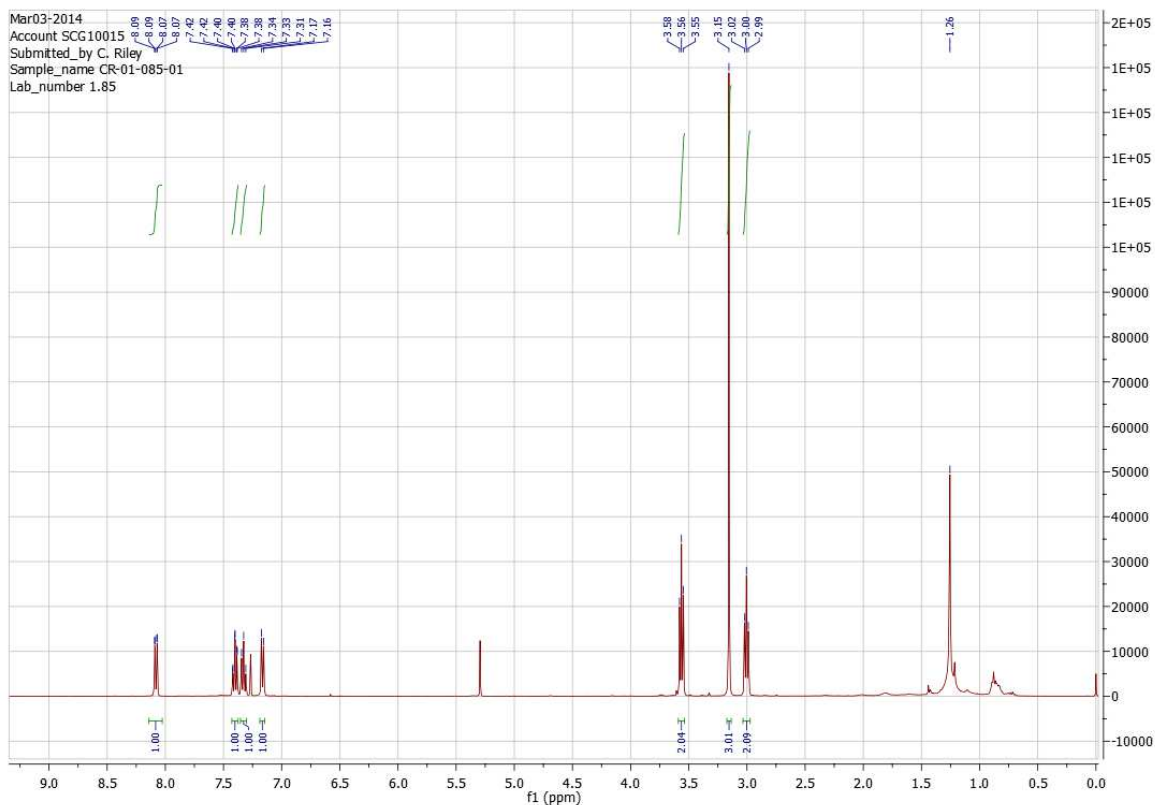

**Figure S58.**  $^1\text{H}$ -NMR spectrum (400 MHz,  $\text{CDCl}_3$ ) of compound **8c**.

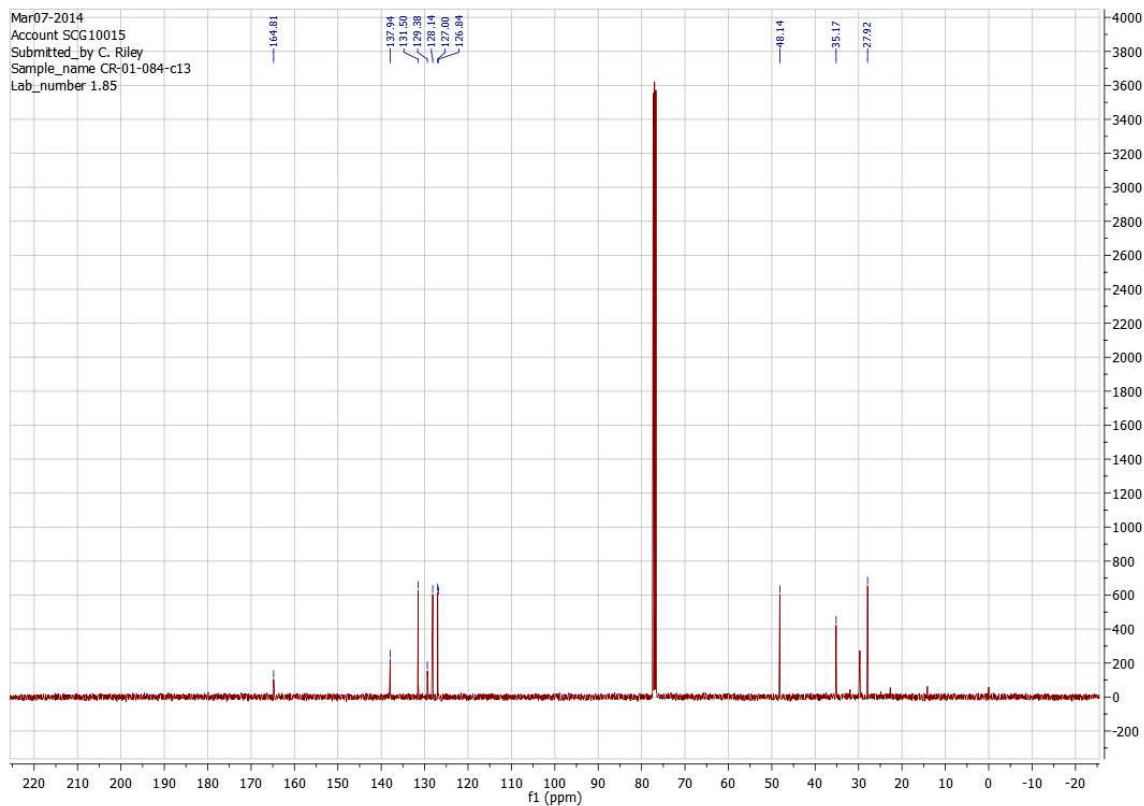

**Figure S59.**  $^{13}\text{C}$ -NMR spectrum (100 MHz,  $\text{CDCl}_3$ ) of compound **8c**.

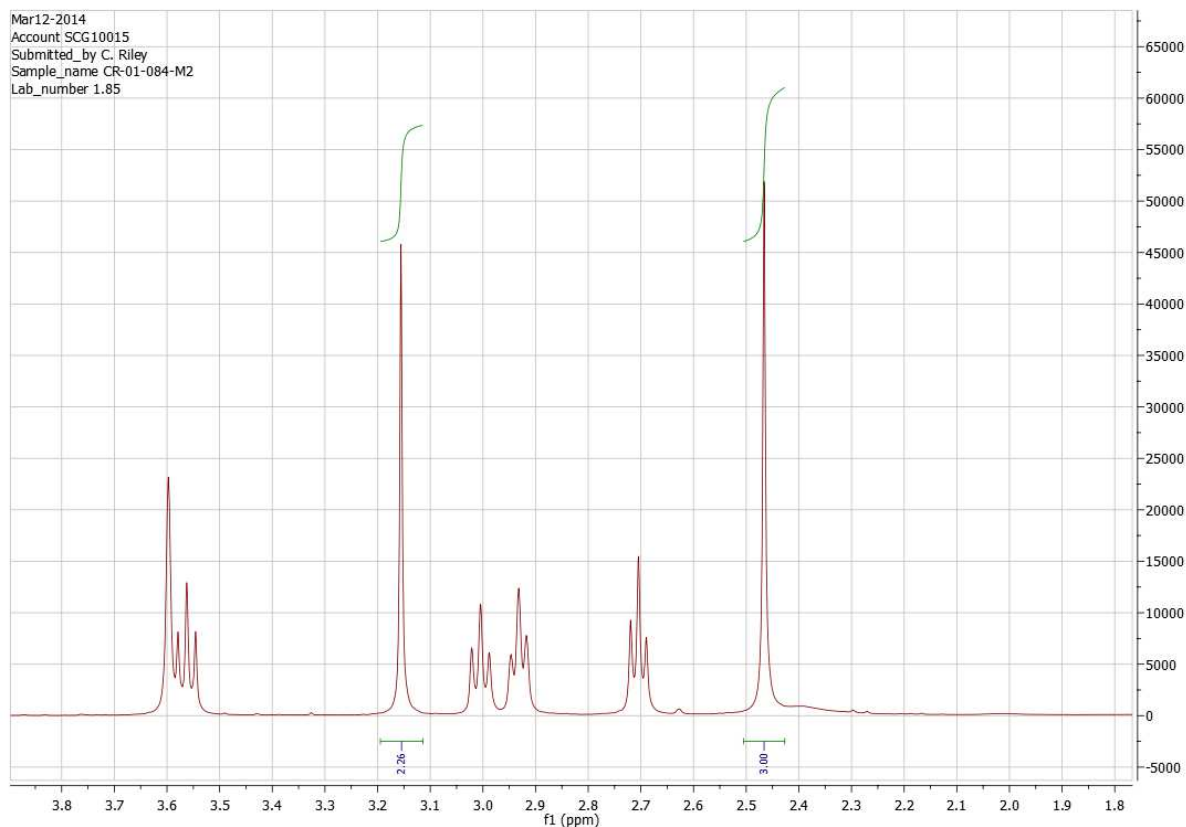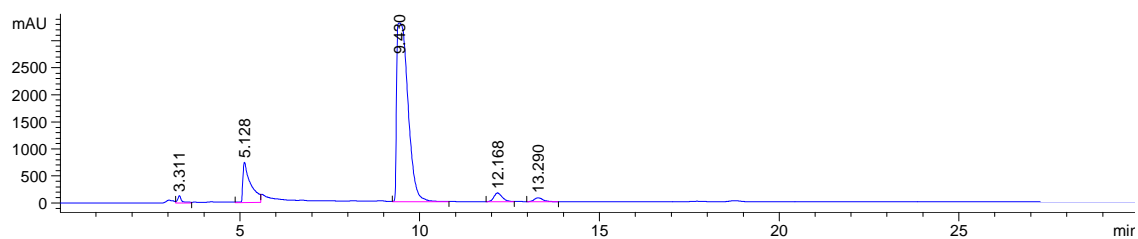

| Peak          | Retention time [min] | Area [%] |
|---------------|----------------------|----------|
| 1(amine 6c)   | 5.128                | 12.78    |
| 2 (lactam 8c) | 9.430                | 81.83    |

Response factor amine = lactam/8.5

**Figure S60.** Calibration of HPLC response for *ca.* 1:1 of **6c:8c** (-OCH<sub>3</sub> singlets) by NMR. HPLC conditions: CHIRALCEL<sup>®</sup> OJ-H column; flow rate 1.0 mL/min; UV 254 nm; eluent= hexane/iPrOH 90:10.



## 5.6. Screening of electron acceptors for xanthine dehydrogenases for conversion of 7a to 8a

**Table S8:** Screening of electron acceptors for *R. capsulatus* XDH E232V and use of *E. coli* xanthine dehydrogenase for conversion of **7a** to **8a**<sup>[a]</sup> based on HPLC peak areas at  $\lambda = 254$  nm.

| Entry | Conditions                                                 | Time [min] | Conversion of 7a to 8a [%] |
|-------|------------------------------------------------------------|------------|----------------------------|
| 1     | 1 eq. DCPIP                                                | 90         | 22                         |
| 2     | 15 mol% DCPIP/aeration                                     | 90         | 28                         |
| 3     | 15 mol% DCPIP, SOD, aeration                               | 90         | 24                         |
| 4     | PMS                                                        | 120        | 0                          |
| 5     | 10 mol% PMS, 10mol% DCPIP                                  | 120        | 36                         |
| 6     | 1 eq. K <sub>3</sub> Fe(CN) <sub>6</sub>                   | 120        | 21                         |
| 7     | <b>10 mol% DCPIP, 1eq. K<sub>3</sub>Fe(CN)<sub>6</sub></b> | <b>45</b>  | <b>65</b>                  |
| 8     | <b>10 mol% DCPIP, <i>T. versicolor</i> laccase</b>         | <b>240</b> | <b>67</b>                  |
| 9     | <i>E. coli</i> XDH                                         | <b>120</b> | <b>100</b> <sup>[b]</sup>  |

<sup>[a]</sup> Conditions: DHIQ **7a** (1 mM) in buffer (100 mM, KPi, pH 7.6), XDH E232V (20  $\mu$ L, 112  $\mu$ M), reaction volume 200  $\mu$ L; [b] NaPi buffer (50 mM, pH 7.4), 2 h, 20 °C. HPLC conditions: CHIRALPAK<sup>®</sup> IA column; flow rate 1.0 mL/min; UV 254 nm; eluent= hexane/iPrOH 90:10.

---

## 6. References

1. Palmer, T., Santini, C.-L., Iobbi-Nivol, C., Eaves, D. J., Boxer, D. H., & Giordano, G. *Mol. Microbiol.* **1996**, *20*, 875–884.
2. *E.coli* xanthine dehydrogenase is sold as xanthine oxidase, microbial by Sigma-Aldrich. However, since the enzyme accepts  $\text{NAD}^+$  as a cofactor it is not an oxidase and therefore we refer to it as xanthine dehydrogenase.
3. Rowles, I., Malone, K. J., Etchells, L. L., Willies, S. C., & Turner, N. J. *ChemCatChem*, **2012**, *4*, 1259–1261.
4. Escalettes, F. & Turner, N. J. *ChemBioChem*, **2008**, *9*, 857–860.
5. Deacon, S.E. & McPherson, J. *ChemBioChem.*, 2011, *12*, 593-601.
6. Leimkühler, S. *The Journal of Biological Chemistry*, **2004**, *279*, 40437–40444.
7. Schumann, S., Terao, M., Garattini, E., Saggu, M., Lendzian, F., Hildebrandt, P., and Leimkühler, S. *PLoS ONE*, **2009**, *4*, e5348.
8. Ekoue-Kovi, K. & Wolf, C. *Org. Lett.*, **2007**, *9*, 3429–3432.
9. Wang, W., Xu, Y., Mo, F., Ji, G., Qiu, D., Feng, J., Ye, Y., Zhang, S., Zhang, Y. and Wang, J. *J. Am. Chem. Soc.*, **2013**, *135*, 10330–10333.
10. Dohle, W., Lindsay, D. M. & Knochel, P. *Org. Lett.*, **2001**, *3*, 2871-2873.
11. Das, S., Addis, D., Zhou, S., Junge, K. & Beller, M. *J. Am. Chem. Soc.*, **2010**, *132*, 1770–1771.
12. Pop, I. E., De Prez, P. B. & Tartar, A. L. *J. Org. Chem.* **1997**, *62*, 2594-2603.
13. S. Durand-Henchoz, R. C. Moreau, *Bull. Soc. Chim. Fr.* **1966**, 3413-16.
14. Holt, A., Palcic, M.M. *Nat. Protoc.* **2006**, *1*, 2498-2505.
15. Dohi, T., Takenaga, N., Goto, A., Fujioka, H., Kita, Y. *J Org Chem.* **2008**, *73*, 7365-8.
16. Ruchirawat, S., Chunkamnerdkarn, M., Thianpatanagul, S., *Tetrahedron Lett.*, **1984**, *25*, 3479-3480.
